# Supplementary material
Source: PubMed Central journal article supplement (PMC4793641)

## Appendix 1. Completed PRISMA reporting guideline checklist for the present review

| Section/topic             | #  | Checklist item                                                                                                                                                                                                                                                                                              | Reported on page # |
|---------------------------|----|-------------------------------------------------------------------------------------------------------------------------------------------------------------------------------------------------------------------------------------------------------------------------------------------------------------|--------------------|
| <b>TITLE</b>              |    |                                                                                                                                                                                                                                                                                                             |                    |
| Title                     | 1  | Identify the report as a systematic review, meta-analysis, or both.                                                                                                                                                                                                                                         | 1                  |
| <b>ABSTRACT</b>           |    |                                                                                                                                                                                                                                                                                                             |                    |
| Structured summary        | 2  | Provide a structured summary including, as applicable: background; objectives; data sources; study eligibility criteria, participants, and interventions; study appraisal and synthesis methods; results; limitations; conclusions and implications of key findings; systematic review registration number. | 3-4                |
| <b>INTRODUCTION</b>       |    |                                                                                                                                                                                                                                                                                                             |                    |
| Rationale                 | 3  | Describe the rationale for the review in the context of what is already known.                                                                                                                                                                                                                              | 6                  |
| Objectives                | 4  | Provide an explicit statement of questions being addressed with reference to participants, interventions, comparisons, outcomes, and study design (PICOS).                                                                                                                                                  | 6                  |
| <b>METHODS</b>            |    |                                                                                                                                                                                                                                                                                                             |                    |
| Protocol and registration | 5  | Indicate if a review protocol exists, if and where it can be accessed (e.g., Web address), and, if available, provide registration information including registration number.                                                                                                                               | 7                  |
| Eligibility criteria      | 6  | Specify study characteristics (e.g., PICOS, length of follow-up) and report characteristics (e.g., years considered, language, publication status) used as criteria for eligibility, giving rationale.                                                                                                      | 7-8                |
| Information sources       | 7  | Describe all information sources (e.g., databases with dates of coverage, contact with study authors to identify additional studies) in the search and date last searched.                                                                                                                                  | 7-8                |
| Search                    | 8  | Present full electronic search strategy for at least one database, including any limits used, such that it could be repeated.                                                                                                                                                                               | Appendix 3         |
| Study selection           | 9  | State the process for selecting studies (i.e., screening, eligibility, included in systematic review, and, if applicable, included in the meta-analysis).                                                                                                                                                   | 7-8                |
| Data collection process   | 10 | Describe method of data extraction from reports (e.g., piloted forms, independently, in duplicate) and any processes for obtaining and confirming data from investigators.                                                                                                                                  | 8-9                |
| Data items                | 11 | List and define all variables for which data were sought (e.g., PICOS, funding sources) and any assumptions and simplifications made.                                                                                                                                                                       | 9-10, Tables 1-9,  |

|                                    |    |                                                                                                                                                                                                                        |                                                                  |
|------------------------------------|----|------------------------------------------------------------------------------------------------------------------------------------------------------------------------------------------------------------------------|------------------------------------------------------------------|
|                                    |    |                                                                                                                                                                                                                        | Figures 4-4-14                                                   |
| Risk of bias in individual studies | 12 | Describe methods used for assessing risk of bias of individual studies (including specification of whether this was done at the study or outcome level), and how this information is to be used in any data synthesis. | 9, Tables 3-4                                                    |
| Summary measures                   | 13 | State the principal summary measures (e.g., risk ratio, difference in means).                                                                                                                                          | 10                                                               |
| Synthesis of results               | 14 | Describe the methods of handling data and combining results of studies, if done, including measures of consistency (e.g., $I^2$ ) for each meta-analysis.                                                              | 9-10                                                             |
| Risk of bias across studies        | 15 | Specify any assessment of risk of bias that may affect the cumulative evidence (e.g., publication bias, selective reporting within studies).                                                                           | This item is not applicable as per reasoning provided on page 9. |
| Additional analyses                | 16 | Describe methods of additional analyses (e.g., sensitivity or subgroup analyses, meta-regression), if done, indicating which were pre-specified.                                                                       | Not applicable/not done. Statement provided on page 13.          |
| <b>RESULTS</b>                     |    |                                                                                                                                                                                                                        |                                                                  |
| Study selection                    | 17 | Give numbers of studies screened, assessed for eligibility, and included in the review, with reasons for exclusions at each stage, ideally with a flow diagram.                                                        | 10-11, Figures 2-3                                               |
| Study characteristics              | 18 | For each study, present characteristics for which data were extracted (e.g., study size, PICOS, follow-up period) and provide the citations.                                                                           | 11-13, Tables 1,2,5,6                                            |
| Risk of bias within studies        | 19 | Present data on risk of bias of each study and, if available, any outcome level assessment (see item 12).                                                                                                              | 12-13, Tables 3-4                                                |

|                               |    |                                                                                                                                                                                                          |                                              |
|-------------------------------|----|----------------------------------------------------------------------------------------------------------------------------------------------------------------------------------------------------------|----------------------------------------------|
| Results of individual studies | 20 | For all outcomes considered (benefits or harms), present, for each study: (a) simple summary data for each intervention group (b) effect estimates and confidence intervals, ideally with a forest plot. | 13-15, Figures 4-14, Tables 7-9, Appendix 7. |
| Synthesis of results          | 21 | Present results of each meta-analysis done, including confidence intervals and measures of consistency.                                                                                                  | 13-15, Figures 4-14, Tables 7-8, Appendix 7. |
| Risk of bias across studies   | 22 | Present results of any assessment of risk of bias across studies (see Item 15).                                                                                                                          | Not applicable                               |
| Additional analysis           | 23 | Give results of additional analyses, if done (e.g., sensitivity or subgroup analyses, meta-regression [see Item 16]).                                                                                    | Not applicable                               |
| <b>DISCUSSION</b>             |    |                                                                                                                                                                                                          |                                              |
| Summary of evidence           | 24 | Summarize the main findings including the strength of evidence for each main outcome; consider their relevance to key groups (e.g., healthcare providers, users, and policy makers).                     | 15-20                                        |
| Limitations                   | 25 | Discuss limitations at study and outcome level (e.g., risk of bias), and at review-level (e.g., incomplete retrieval of identified research, reporting bias).                                            | 16-20                                        |
| Conclusions                   | 26 | Provide a general interpretation of the results in the context of other evidence, and implications for future research.                                                                                  | 21                                           |
| <b>FUNDING</b>                |    |                                                                                                                                                                                                          |                                              |
| Funding                       | 27 | Describe sources of funding for the systematic review and other support (e.g., supply of data); role of funders for the systematic review.                                                               | 22-23                                        |

## **Appendix 2. Methods modifications from the protocol**

A systematic review of evaluations of the CONSORT guideline has been recently published.<sup>16,17</sup> As such, during the screening process for this review, we decided to exclude CONSORT evaluations and focus our efforts on other reporting guidelines and refer readers to the published CONSORT assessment. We originally planned to include checklist items for which variations in use could be possible (e.g., various parties ‘blinded’ for the CONSORT statement), but decided against this as we would not have been consistent with our decision to exclude checklist items that were split into two or more separate items in evaluations.

For assessing validity of the evaluations we made some changes from the protocol. We clarified the wording of items regarding comprehensive search strategies and balanced numbers of studies across journals (i.e, are studies within a given arm of a comparison close to evenly distributed across journals such that data are presumed not to be influenced by a ‘clustering’ effect?). We changed the item of whether confounding was accounted for in the evaluation to that of the sampling period because, in general, authors were not assessing according to journal endorsement and we had to rework their data to facilitate our comparisons of interest. Similarly, since authors were not evaluating with respect to journal endorsement, we did not feel it relevant to assess whether the authors’ intended set of data was completely reported.

## **Appendix 3. Search strategies**

### **SEARCH FOR EVALUATIONS - ACRONYM SEARCHING (MEDLINE, EMBASE, COCHRANE METHODOLOGY REGISTER)**

Guidelines searched: MOOSE, STARD, CONSORT, STRICTA, RedHot, STARE-HI, MIMIX, MISFISHIE, MIAPE, MIAPEMS, STREGA, STROBE, ORION, SQUIRE, QUOROM, PRISMA, GRIPS, REHBaR, GRRAS, Guide4DBS-PD, GPP2, and Utstein style (representing various guidelines). Refer to search strategies below.

### **SEARCH FOR EVALUATIONS - FORWARD-CITE SEARCHING (SCOPUS)**

All other reporting guidelines with acronyms that had other meaning or other guidelines without acronyms were forward cite searched for evaluations in Scopus.

## **SEARCH STRATEGIES**

### **Ovid MEDLINE(R) In-Process & Other Non-Indexed Citations, Ovid MEDLINE(R), Embase**

---

#### **Main search**

- 1 "Meta-analysis Of Observational Studies in Epidemiology".ti,ab.
- 2 MOOSE.ti,ab.
- 3 limit 2 to animal
- 4 2 not 3
- 5 1 or 4
- 6 ((standard\$1 adj2 "reporting of diagnostic accuracy") or STARD).ti,ab.
- 7 ("Consolidated Standards of Reporting Trials" or CONSORT).ti,ab.
- 8 ("Standards for Reporting Interventions in Controlled Trials of Acupuncture" or STRICTA).ti,ab.
- 9 ("Reporting data on homeopathic treatments" or RedHot).ti,ab.

- 10 ("Statement on reporting of evaluation studies in Health Informatics" or "STARE-HI").ti,ab.
- 11 ("Minimum Information Required for Reporting a Molecular Interaction Experiment" or MIMIX).ti,ab.
- 12 ("Minimum Information Specification for In Situ Hybridization" or MISFISHIE).ti,ab.
- 13 ("Minimum Information about a Proteomics Experiment" or MIAPE or MIAPEMS or MIAPE-MS).ti,ab.
- 14 ("Strengthening the Reporting of Genetic Association Studies" or STREGA).ti,ab.
- 15 ("Strengthening the Reporting of Observational Studies in Epidemiology" or STROBE).ti,ab.
- 16 ("Outbreak Reports and Intervention Studies of Nosocomial Infection" or ORION).ti,ab.
- 17 ("Standards for Quality Improvement Reporting Excellence" or SQUIRE).ti,ab.
- 18 ("Quality of Reporting of Meta-Analyses" or "Quality of Reporting of Metaanalyses" or "Quality of Reporting of Metanalyses" or (QUORUM adj5 (reporting or meta-analy\* or metaanaly\* or metanaly\* or systematic review\* or statement\* or guideline\* or checklist\* or criteria\* or flowchart\* or flow chart\* or flow diagram\*))).ti,ab.
- 19 ("Preferred Reporting Items for Systematic Reviews and Metaanalyses" or PRISMA).ti,ab.
- 20 ("Strengthening the reporting of genetic risk prediction studies" or GRIPS).ti,ab.
- 21 ("Reporting Experiments in Homeopathic Basic Research" or REHBaR).ti,ab.
- 22 ("Guidelines for Reporting Reliability and Agreement Studies" or GRRAS).ti,ab.
- 23 ("Standard guidelines for publication of deep brain stimulation studies" or "Guide4DBS-PD").ti,ab.
- 24 (good publication practice\$1 or GPP2).ti,ab.
- 25 "Utstein style".ti,ab.
- 26 or/5-25
- 27 limit 26 to (comment or editorial or guideline or letter) [Limit not valid in Embase; records were retained]
- 28 26 not 27
- 29 limit 28 to yr="1990-Current"
- 30 29 use prmz

- 31 "Meta-analysis Of Observational Studies in Epidemiology".ti,ab.
- 32 MOOSE.ti,ab.
- 33 limit 32 to animal
- 34 32 not 33
- 35 31 or 34
- 36 ((standard\$1 adj2 "reporting of diagnostic accuracy") or STARD).ti,ab.
- 37 ("Consolidated Standards of Reporting Trials" or CONSORT).ti,ab.
- 38 ("Standards for Reporting Interventions in Controlled Trials of Acupuncture" or STRICTA).ti,ab.
- 39 ("Reporting data on homeopathic treatments" or RedHot).ti,ab.
- 40 ("Statement on reporting of evaluation studies in Health Informatics" or "STARE-HI").ti,ab.
- 41 ("Minimum Information Required for Reporting a Molecular Interaction Experiment" or MIMIX).ti,ab.
- 42 ("Minimum Information Specification for In Situ Hybridization" or MISFISHIE).ti,ab.
- 43 ("Minimum Information about a Proteomics Experiment" or MIAPE or MIAPEMS or MIAPE-MS).ti,ab.
- 44 ("Strengthening the Reporting of Genetic Association Studies" or STREGA).ti,ab.
- 45 ("Strengthening the Reporting of Observational Studies in Epidemiology" or STROBE).ti,ab.
- 46 ("Outbreak Reports and Intervention Studies of Nosocomial Infection" or ORION).ti,ab.
- 47 ("Standards for Quality Improvement Reporting Excellence" or SQUIRE).ti,ab.
- 48 ("Quality of Reporting of Meta-Analyses" or "Quality of Reporting of Metaanalyses" or "Quality of Reporting of Metanalyses" or (QUORUM adj5 (reporting or meta-analy\* or metaanaly\* or metanaly\* or systematic review\* or statement\* or guideline\* or checklist\* or criteria\* or flowchart\* or flow chart\* or flow diagram\*))).ti,ab.
- 49 ("Preferred Reporting Items for Systematic Reviews and Metaanalyses" or PRISMA).ti,ab.
- 50 ("Strengthening the reporting of genetic risk prediction studies" or GRIPS).ti,ab.
- 51 ("Reporting Experiments in Homeopathic Basic Research" or REHBaR).ti,ab.
- 52 ("Guidelines for Reporting Reliability and Agreement Studies" or GRRAS).ti,ab.

53 ("Standard guidelines for publication of deep brain stimulation studies" or "Guide4DBS-  
PD").ti,ab.

54 (good publication practice\$1 or GPP2).ti,ab.

55 "Utstein style".ti,ab.

56 or/35-55

57 limit 56 to (editorial or letter)

58 56 not 57

59 limit 58 to yr="1990-Current"

60 59 use emez

61 30 or 60

62 limit 61 to yr="2000-Current"

63 remove duplicates from 62

64 limit 61 to yr="1990-1999"

65 remove duplicates from 64

66 63 or 65

67 66 use prmz **MEDLINE RESULTS**

68 limit 67 to yr="2010-current"

69 limit 67 to yr="2007-2009"

70 limit 67 to yr="2001-2006"

71 limit 67 to yr="1995-2000"

72 limit 67 to yr="1990-1994"

73 or/68-72

74 66 use emez **EMBASE RESULTS**

75 limit 74 to yr="2005-current"

76 limit 74 to yr="1990-2004"

#### **Addendum search**

---



- 1 quorum.ti,ab.
- 2 "strobe-me".ti,ab.
- 3 ("Biospecimen reporting for improved study quality" or BRISQ).ti,ab.
- 4 or/1-3
- 5 limit 4 to (comment or editorial or guideline or letter) [Limit not valid in Embase; records were retained]
- 6 4 not 5
- 7 limit 6 to yr="1990-Current"
- 8 7 use prmz
- 9 quorum.ti,ab.
- 10 "strobe-me".ti,ab.
- 11 ("Biospecimen reporting for improved study quality" or BRISQ).ti,ab.
- 12 or/9-11
- 13 limit 12 to (comment or editorial or guideline or letter) [Limit not valid in Embase; records were retained]
- 14 12 not 13
- 15 limit 14 to yr="1990-Current"
- 16 15 use emez
- 17 8 or 16
- 18 remove duplicates from 17
- 19 18 use prmz **MEDLINE RESULTS**
- 20 18 use emez **EMBASE RESULTS**

\*\*\*\*\*

## **COCHRANE METHODOLOGY REGISTER**

### **Main search**

- #1 "Meta-analysis Of Observational Studies in Epidemiology" OR  
MOOSE:ti,ab,kw
- #2 ((standard\* NEAR/2 "reporting of diagnostic accuracy") or  
STARD):ti,ab,kw
- #3 ("Consolidated Standards of Reporting Trials" or CONSORT):ti,ab,kw
- #4 ("Standards for Reporting Interventions in Controlled Trials of  
Acupuncture" or STRICTA):ti,ab,kw
- #5 ("Reporting data on homeopathic treatments" or RedHot):ti,ab,kw
- #6 ("Statement on reporting of evaluation studies in Health Informatics" or  
"STARE-HI"):ti,ab,kw
- #7 ("Minimum Information Required for Reporting a Molecular Interaction  
Experiment" or MIMIX):ti,ab,kw
- #8 ("Minimum Information Specification for In Situ Hybridization" or  
MISFISHIE):ti,ab,kw
- #9 ("Minimum Information about a Proteomics Experiment" or MIAPE or  
MIAPEMS or MIAPE-MS):ti,ab,kw
- #10 ("Strengthening the Reporting of Genetic Association Studies" or  
STREGA):ti,ab,kw
- #11 ("Outbreak Reports and Intervention Studies of Nosocomial Infection" or  
ORION):ti,ab,kw
- #12 ("Standards for Quality Improvement Reporting Excellence" or  
SQUIRE):ti,ab,kw
- #13 ("Quality of Reporting of Meta-Analyses" or "Quality of Reporting of  
Metaanalyses" or "Quality of Reporting of Metanalyses"):ti,ab,kw

- #14 (QUORUM NEAR/5 (reporting or meta-analy\* or metaanaly\* or metanaly\* or systematic review\* or statement\* or guideline\* or checklist\* or criteria\* or flowchart\* or (flow NEXT chart\*) or (flow NEXT diagram\*))) :ti,ab,kw
- #15 ("Preferred Reporting Items for Systematic Reviews and Metaanalyses" or PRISMA) :ti,ab,kw
- #16 ("Strengthening the reporting of genetic risk prediction studies" or GRIPS) :ti,ab,kw
- #17 ("Reporting Experiments in Homeopathic Basic Research" or REHBaR) :ti,ab,kw
- #18 ("Guidelines for Reporting Reliability and Agreement Studies" or GRRAS) :ti,ab,kw
- #19 ("Standard guidelines for publication of deep brain stimulation studies" or "Guide4DBS-PD") :ti,ab,kw
- #20 ("good publication" NEXT practice\*) or GPP2) :ti,ab,kw
- #21 "Utstein style" :ti,ab,kw
- #22 ("Strengthening the Reporting of Observational Studies in Epidemiology" or STROBE) :ti,ab,kw
- #23 (#1 OR #2 OR #3 OR #4 OR #5 OR #6 OR #7 OR #8 OR #9 OR #10 OR #11 OR #12 OR #13 OR #14 OR #15 OR #16 OR #17 OR #18 OR #19 OR #20 OR #21 OR #22)

### **Addendum search**

- #1 (quorum or "strobe-me" or "Biospecimen reporting for improved study

quality" or BRISQ):ti,ab,kw

#2 (#1), from 1990 to 2012

#### **Appendix 4. Citations of articles written in languages other than English or French that are potentially relevant to this review.**

These articles were excluded because of language and may not meet other inclusion criteria or may also be excluded for other reasons.

##### **Level 1 screening**

Schulte-Lobbert F-J. Erratum: Möglichkeiten der Arzneimittelherstellung in der Apotheke (PZ PRISMA 4, 42-45 (1997)). PZ Prisma 1997;4(2):124.

Lauterbach KW. Ökonomische und ethische Aspekte der Entwicklung von Behandlungsleitlinien. Z Arztl Fortbild Qualitätssich 1997;91(3):277-82.

Cortés A, Flor E, Duque G. Análisis de costos de la atención médica hospitalaria. Experiencia en una clínica privada de nivel II-III. Colomb Med 2002;33(2):45-51.

Mirassou Y, Ja-Moreno D, Santiveri CM, Santoro J, Jas-Arnanz M, Padmanabhan S, et al. <sup>1</sup>H, <sup>13</sup>C and <sup>15</sup>N backbone and side chain resonance assignments of the C-terminal domain of CdnL from *Myxococcus xanthus*. Biomol NMR Assignments 2009;3(1):9-12.

Rosén M, Axelsson S, Lindblom J. Släng inte ut observations-studier med badvattnet: Bedömeras kvalitet i stället. Lakartidningen 2008;105(45):3191-4.

Link H, Kolb HJ, Ebell W, Hossfeld DK, Zander A, Niethammer D, et al. Die Transplantation hämatopoetischer Stammzellen Teil I: Definitionen, prinzipielle Anwendungsmöglichkeiten, Komplikationen. Med Klin 1997;92(8):480-91+505.

Salomonsson B, Sandell R, Werbart A, Rydelius PA. Psykoanalytisk behandling vid störningar i mor-barnrelationen. Lakartidningen 2011;108(18):984-7.

García López F, Gutiérrez Bezón S, Galende Domínguez I, Avendaño Solá C. [Assessment of quality of clinical trials: Rationale, usefulness and drawbacks]. Med Clin (Barc ) 1999;112(SUPPL. 1):35-42.

Ziegler A, König IR. Reporting standards: German translation of CONSORT 2010, PRISMA and STARD. Dtsch Med Wochenschr 2011;136(8):357-8.

Carrasco G, Lorenzo S, Santillán M. Revista de Calidad Asistencial style manual. Mandatory guide for new authors. Rev Calidad Asist 2011;26(2):132-41.

Eklöf H, Bergqvist D, Hägg A, Gottsäter A, Kahan T, Dimény E, et al. Experter eniga om indikationer för behandling av njurartärstenos. Lakartidningen 2010;107(36):2102-4.

Gottsäter A, Alhadad A, Lindblad B. Fibromuskulär dysplasi - Angiopati som oftast drabbar njurartärerna. Lakartidningen 2009;106(44):2830-5.

Van Der Zaag ES, Prins MH, Jacobs MJHM. Behandeling van claudicatio intermittens; prospectief gerandomiseerd onderzoek in de BAESIC-trial. Ned Tijdschr Geneeskd 1996;140(14):787-8.

Tegnell A, Gerle M, von Knorring AL, Andersson G. Nationella riktlinjerna stA • r pA • solid grund. Lakartidningen 2010;107(45):2825.

## **Level 2 screening**

### Reference List

Cobos-Carbo A, Augustovski F. CONSORT 2010 Declaration: updated guideline for reporting parallel group randomised trials. Med Clin (Barc) 2011 Jul 23;137(5):213-5.

Li CJ, Lu J, Su NC, Li S, Shi ZD. Preferred reporting items for systematic reviews and meta-analysis for reporting quality of Chinese meta-analysis on stomatology. Chung Hua Kou Chiang Hsueh Tsa Chih 2011 May;46(5):257-62.

Sun YN, Lei FF, Cao YL, Fu MK. Evidence-based quality assessment of 10-year orthodontic clinical trials in 4 major dental journals. Chung Hua Kou Chiang Hsueh Tsa Chih 2010 Feb;45(2):105-8.

Oliveira MR, Gomes AC, Toscano CM. QUADAS and STARD: evaluating the quality of diagnostic accuracy studies. Rev Saude Publica 2011 Apr;45(2):416-22.

Urrutia G, Bonfill X. PRISMA declaration: a proposal to improve the publication of systematic reviews and meta-analyses. Med Clin (Barc) 2010 Oct 9;135(11):507-11.

Zheng H, Liang FR, Li Y. Features of acupuncture randomised controlled trials published in the top four journals. Zhongguo zhenjiu 2010 Aug;30(8):679-82.

Gomez SN, Hernandez-Aguado I, Lumbreras B. Observacional study: evaluation of the diagnostic research methodology in Spain after STARD publication. Med Clin (Barc) 2009 Sep 5;133(8):302-10.

Song W, Mo DF, Lan BQ, Gao YS. A report of 463 in-hospital cardiopulmonary resuscitation based on the "Utstein Style". Zhongguo Wei Zhong Bing Ji Jiu Yi Xue 2008 Dec;20(12):713-6.

Zhang Y, Zhang RM, Chang J. Quality assessment of the report of randomized controlled trials on treatment of liver carcinoma with traditional Chinese medicine. Zhongguo Zhong Xi Yi Jie He Za Zhi 2008 Jul;28(7):588-90.

Schmucker C, Blumle A, Antes G, Lagreze W. Randomized controlled and controlled clinical trials in German-language ophthalmological journals. *Ophthalmologie* 2008 Mar;105(3):255-61.

Vavken P, Culen G, Dorotka R. Clinical applicability of evidence-based orthopedics--a cross-sectional study of the quality of orthopedic evidence. *Z Orthop Unfall* 2008 Jan;146(1):21-5.

Stagelund S, Lippert FK. Documentation of in-hospital cardiac arrest. *Ugeskr Laeger* 2008 Jan 28;170(5):348-51.

Garcia-Alamino JM, Parera A, Olle G, Bonfill X. Clinical trials published in *Revista Espanola de Anestesiologia y Reanimacion*: characteristics and quality of design. *Rev Esp Anestesiol Reanim* 2007 Jun;54(6):333-9.

Liu JP, Xia Y. Quality appraisal of systematic reviews or meta-analysis on traditional Chinese medicine published in Chinese journals. *Zhongguo Zhong Xi Yi Jie He Za Zhi* 2007 Apr;27(4):306-11.

Kim S, Oh HB, Cha CH, Choi SE, An HY, Lee KJ. Quality Evaluation of the Performance Study of Diagnostic Tests Using STARD Checklist and Meta-Analysis for the Pooled Sensitivity and Specificity of Third Generation Anti-HCV EIA Tests. *Korean J Lab Med* 2006 Aug;26(4):307-15.

Urrutia G, Tort S, Bonfill X, QUOROM group. Meta-analyses (QUOROM). *Med Clin (Barc)* 2005 Dec 1;125 Suppl 1:32-7.

Altman DG, Moher D. Developing guidelines for reporting healthcare research: scientific rationale and procedures. *Med Clin (Barc)* 2005 Dec 1;125 Suppl 1:8-13.

Lumbreras B, Jarrin I, Hernandez A, I. Evaluation of the research methodology in genetic, molecular and proteomic tests. *Gac Sanit* 2006 Sep;20(5):368-73.

Diener MK, Blumle A, Szakallas V, Antes G, Seiler CM. Randomized and nonrandomized controlled clinical trials in a German surgical journal. *Chirurg* 2006 Sep;77(9):837-43.

Surkont G, Wlzlak E, Kowalski A, Zdziennicki A, Suzin J. Efficacy of burch colposuspension in the stress urinary incontinence treatment evaluated with the use of consort diagram. *Ginekol Pol* 2006 Jun;77(6):463-7.

Li TQ, Wang G, Wang L. Problems and strategies in clinical trials of traditional Chinese medicine. *Zhongguo Zhong Xi Yi Jie He Za Zhi* 2006 Apr;26(4):298-302.

Rangel Mayoral JF, Luis FJ, Liso Rubio FJ. Current research status in pharmaceutical care. *Farm* 2005 Sep;HOSP.. 29(5):335-42.

Moher D, Schulz KF, Altman DG, CONSORT. The CONSORT statement: Revised Recommendations For Improving the Quality of Reports of Parallel-Group Randomized Trials. *Zhongguo Zhong Xi Yi Jie He Za Zhi* 2005 Jul;25(7):658-61.

Manriquez MJ, Valdivia CG, Rada GG, Letelier S LM. Critical assessment of randomized controlled trials published in biomedical Chilean journals. *Rev Med Chil* 2005 Apr;133(4):439-46.

Dainesi SM, Aligieri P. How the "CONSORT" recommendations can ensure the quality of clinical trial reports. *Rev Assoc Med Bras* 2005 Mar;51(2):66, 2005-66, 2Apr.

Gotzsche PC, CONSORT g. Better reporting of harms in randomized trials: an extension of the CONSORT statement. *Ugeskr Laeger* 2005 Apr 4;167(14):1520-2.

Lindstedt G, Eliasson M. New guidelines for better documentation of survey methodology and results. *Lakartidningen* 2005 Mar 7;102(10):748, 750, 752-48, 750, 753.

Moher D, Schulz KF, Altman DG, CONSORT Group. CONSORT statement. Revised findings on quality improvement based on reports from randomized studies in parallel design. *Schmerz* 2005 Apr;19(2):156-62.

Alfaro V. Clinical trials, good publication practice and legal regulations. *Med Clin (Barc)* 2004 Jun 19;123(3):100-3.

Liu XM, Zhang MM, Du L. Quality of methodology and reporting of randomized controlled trials of acupuncture for obesity. *Chung Kuo I Hsueh Ko Hsueh Yuan Hsueh Pao* 2004 Apr;26(2):192-4.

Hasford J. Publication of clinical studies. CONSORT statement. *Med Monatsschr Pharm* 2002 Dec;25(12):430-1.

Strippoli GF, Manno C, Schena FP. Randomized controlled trials: a controversial past and a future of regulation and rejection. *Giornale italiano di nefrologia* 2002 Jan;19(1):4-12.

Garcia Lopez FJ, Gutierrez BS, Galende D, I, Avendano SC. The evaluation of the quality of clinical trials: the rationale, usefulness and drawbacks. *Med Clin (Barc)* 1999;112 Suppl 1:35-42, 1999.:42.

Sterz F, Domanovits H, Janata K, Kurkciyan I, Dufek V, Madl C, et al. "Utstein style" documentation of resuscitation--initial experiences. *Wien Klin Wochenschr Suppl* 1992;194:13-4, 1992.:4.

Collazo CE. Randomized controlled trials of acupuncture (1997-2007): An assessment of reporting quality with a CONSORT- and STRICTA-based instrument. *Revista Internacional de Acupuntura* 2011 Apr;5(2):74-5.

Tackmann R, Schuetz G, Hamm B, Dewey M. [Quality of the reporting of diagnostic accuracy studies: STARD (Standards for the Reporting of Diagnostic accuracy studies)]. *Rofo* 2010 Aug;182(8):655-9.



Zhu H-D, Teng G-J, Guo J-H, Zhu G-Y. Self-expandable esophageal stent loaded with 125I seeds for the treatment of esophageal cancer: Quality assessment of related chinese literature. *J Intervent Radiol* 2011 Jun 30;20(6):455-8.

Hu W, Xu L, Qian X. Quality assessment of randomized controlled trials on treatment of sjogren's syndrome with traditional chinese medicine. *Chin J Evid -Based Med* 2011;11(8):978-82.

Lewandowski K. The relations between therapy results and accepted evaluation criteria of progression free survival and event free survival - Analysis on the basis of tyrosine kinase inhibitors use in patients with chronic myeloid leukemia. *Hematologia* 2011;2(2):99-104.

Rodrigo CP. QUOROM-PRISMA: A systematic review of the literature and meta-analysis. *Rev Esp Nutr Comunitaria* 2010 Apr;16(2):116-7.

Gonzalez De DJ. Checklist in systematic reviews and meta-analysis: The PRISMA statement, beyond the QUOROM. *FMC Formacion Med Continuada Aten Prim* 2011 Mar;18(3):164-6.

Ziegler A, Antes G, Konig IR. Preferred reporting items of systematic review and meta-analyses: The PRISMA statement. *Dtsch Med Wochenschr* 2011;136(8):e9-e15.

Ziegler A, Konig IR. Reporting guidelines: An application of CONSORT 2010. *Dtsch Med Wochenschr* 2011;136(8):e2-e8.

Pittler MH, Blumle A, Meerpohl JJ, Antes G. CONSORT 2010 statement: Updated guidelines for reporting parallel group randomised trials. *Dtsch Med Wochenschr* 2011;136(8):e20-e23.

Wang J, Liu Q, Weng C-G, Wang Y, Li L, Lei X, et al. Quality assessment for chinese systematic reviews/meta-analyses in public health. *Chin J Evid -Based Med* 2010;10(12):1367-74.

Wang Y, Zhang C, Zha Q-L, Jiang M, Lv A-P. Quality assessment of randomized controlled trials involving danhong injection for angina of coronary heart disease. *Chin J Evid -Based Med* 2011;11(2):161-7.

Bossuyt PM, Reitsma JB, Bruns DE, Gatsonis CA, Glasziou PP, Irwig LM, et al. Erratum: Towards complete and accurate reporting of studies of diagnostic accuracy: The STARD initiative. *Dtsch Med Wochenschr* 2011;136(15):e24.

Moher D, Liberati A, Tetzlaff J, Altman DG. Erratum: Preferred reporting items of systematic review and meta-analyses: The PRISMA statement. *Dtsch Med Wochenschr* 2011;136(15):e25.

Schulz KF, Altman DG, Moher D. Erratum: CONSORT 2010 statement: Updated guidelines for reporting parallel group randomised trials. *Dtsch Med Wochenschr* 2011;136(15):e26.

Liu Y-T, Liang W-X. Reporting quality assessment of noninferiority and equivalence randomized controlled trials related to Traditional Chinese Medicine. *Chin J Evid -Based Med* 2011;11(3):336-40.

MacPherson H, Altman DG, Hammerschlag R, White A, Moher D. Revised Standards for Reporting Interventions in Clinical Trials of Acupuncture (STRICTA): Extending the CONSORT statement. *Chin J Evid -Based Med* 2010;10(10):1228-39.

Min J, Mao B, Liu A-R. Quality assessment of randomized controlled trials related to traditional Chinese medicine published in the Chinese Journal of evidence-based medicine. *Chin J Evid -Based Med* 2010;10(3):362-6.

Fuchs S, Fricke F-U, Pirk O. Cancer incidence in insulin treated patients with diabetes mellitus - Evaluation of the publication of Hemkens et al. according to the STROBE quality-criteria. *Perfusion* 2010 Jan;23(1):4-10.

Zhang X-L, Jia W-N, Hu Q-B, Li J, Xiong X-R, Shen n, et al. Assessment of reporting quality of randomized controlled trials in seven journals using the CONSORT statement. *Chin J Evid -Based Med* 2010;10(4):501-4.

Song W, Lei D-R, Yuan T-T, Zou X-Y. Quality analysis of clinical trials on butylphthalide for cerebral ischemic stroke. *Chin J Evid -Based Med* 2010;10(4):483-7.

Argimon-Pallas JM. Improvement of clinical trial publications: The CONSORT initiative. *FMC Formacion Med Continuada Aten Prim* 2005 Dec;12(10):711-2.

Li Y, Du, Liu X. To improve the quality of clinical trials by promote clinical trial registration and good publication practice. *Chin J Evid -Based Med* 2010;10(1):1-2.

Boutron I, Moher D, Altman DG, Schulz KF, Ravaud P. Extending the CONSORT statement to randomized trials of nonpharmacologic treatment: Explanation and elaboration. *J Chin Integr Med* 2009 Jul;7(7):690-9.

Moher D, Liberati A, Tetzlaff J, Altman DG, Altman D, Antes G, et al. Preferred reporting items for systematic reviews and meta-analyses: The PRISMA statement (Chinese edition). *J Chin Integr Med* 2009 Sep;7(9):889-96.

Boutron I, Moher D, Altman DG, Schulz KF, Ravaud P. Extending the CONSORT statement to randomized trials of nonpharmacologic treatment; explanation and elaboration. *J Chin Integr Med* 2009 May;7(5):491-4.

Wang X-D, Li M-M, Deng L, Li L. Reporting quality of randomized controlled trials on laparoscopic surgery for treating colorectal disease in three SCI indexed journals. *Chin J Evid -Based Med* 2009;9(9):1033-6.

Zwarentein M, Treweek S, Gagnier JJ, Altman DG, Tunis S, Haynes B, et al. Improving the reporting of pragmatic trials: An extension of the CONSORT statement. *J Chin Integr Med* 2009 Apr;7(4):392-7.

Tsutani K. What is CONSORT statement? Japanese Journal of Clinical Pharmacology and Therapeutics 2009 May;40(3):105-10.

Xu Q, Sun Q. Evaluation of the paper titled "application of tumor type M2 pyruvate kinase in diagnosis of lung cancer" based on the stard statement. Chin J Evid -Based Med 2009;9(1):113-8.

Zhang X-G, Yang F, Wu T-X, Shi Z-D, Yi X-Z. Evidence of cochrane systematic reviews on the treatment of temporomandibular disorders. Chin J Evid -Based Med 2008;8(12):1130-2.

Moher D, Dagenais S. CONSORT serial 1: How to explain the methodological rationale of randomized controlled trial on traditional Chinese medicine? Chin J Evid -Based Med 2008;8(3):152-4.

Chen J, Suo J, Zeng X-M, Liu Z-C. Quality evaluation of randomized controlled trials involving traditional Chinese medicine for cholelithiasis. Chin J Evid -Based Med 2008;8(5):370-4.

Battegay M. Commentary on the STROBE statement. A checklist for observational studies improves transparency. Internist 2008 Jun;49(6):694.

Kong Z-X, Zhong Z-H, Jiang Z-M. Improving quality of randomized trials of nonpharmacologic treatments by extended CONSORT statement. Chin J Clin Nutr 2008 Apr;16(2):114-7.

Antes G, von EE. Strobe statement: How should an observational study be reported? Dtsch Arztebl 2008 Jan 7;105(1-2):A18.

Mao B, Wang G, Fan T, Chen X-D, Liu J, Wang L, et al. Assessing the quality of reporting of randomized controlled trials in traditional Chinese medicine. Chin J Evid -Based Med 2007 Dec;7(12):880-7.

Shen J, Tang X, Zou K. Quality assessment of the reporting of randomized controlled trials of traditional chinese medicine for chronic fatigue syndrome. Chin J Evid -Based Med 2007 May;7(5):385-91.

Fan T, Wang G, Wang L, Xiong Z-Y, Mao B. Quality assessment of clinical studies on compound salvia pellet (CSP) for angina pectoris. Chin J Evid -Based Med 2007 Jun;7(6):461-71.

Liu Y-L, Yang K-H, Wu T-X, Zhang P-Z, Tian J-H, Ma B, et al. Quality evaluation of randomize controlled trials involving microwave therapy for cervical erosion. Chin J Evid -Based Med 2006 Oct;6(10):768-74.

Zhang X-L, Li J, Zhang M-M, Yuan W-M. Assessing the reporting quality of randomized controlled trials on acupuncture for acute ischemic stroke using the CONSORT statement and STRICTA. Chin J Evid -Based Med 2006 Aug;6(8):586-90.

Mao B, Wang G, Cheng X-D, Fan T, Liu J, Wang L, et al. Quality assessment of the reporting of randomized controlled trials published in the Chinese Journal of Integrated Traditional and Western Medicine with the Revised CONSORT Statement. *Chin J Evid - Based Med* 2006 Apr;6(4):297-304.

Chang J, Li T-Q, Wan M-H, Zhang Y. Quality assessment for randomized controlled trials published in four acts of Traditional Chinese Medicine. *Chin J Evid -Based Med* 2006 Mar;6(3):171-8.

Guidelines on good publication practice: the committee on publication ethics (COPE) report 2003. *Pro-fono : revista de atualizacao cientifica* 2005 May;17(2):264-70.

Li Y-P, Li J, Liu X-M. Establishing collaboration of dissemination of CONSORT statement in China to improve the quality of reporting of randomized clinical trials. *Chin J Evid -Based Med* 2005 Aug;5(8):591-2.

De BK, Tomp D. Skf/prisma symposium. *Pharm Weekbl* 2005 Aug 26;140(34):1058.

Bossuyt PM, Reitsma JB, Bruns DE, Gatsonis CA, Glasziou PP, Irwig LM, et al. The STARD initiative for reporting of studies of diagnostic accuracy: Explanation and comments. *Riv Med Labor* 2003 Apr;4(2):80-93.

Bossuyt PM, Reitsma JB, Bruns DE, Gatsonis CA, Glasziou PP, Irwig LM, et al. The STARD initiative for complete and accurate reporting of studies of diagnostic accuracy. *Riv Med Labor* 2003 Apr;4(2):74-9.

Streitberger K, Schneider A, Unnebrink K. Quality standards for randomised controlled acupuncture trials. *Dtsch Z Akupunkt* 2003;46(4):40-4.

Wiebrecht A. Recommendations of the standards for reporting interventions in controlled trials of acupuncture (STRICTA). *Dtsch Z Akupunkt* 2003;46(1):42-5.

Dick WF, Baskett P, Grande C, Deloos H, Kloeck W, Lackner C, et al. Recommendations for uniform documentation according to trauma severity - The Utstein style. An international initiative of the International Trauma Anaesthesia and Critical Care Society (ITACCS) - Part 3. *Notarzt* 2001;17(3):98-100.

Dick WF, Baskett P, Grande C, Deloos H, Kloeck W, Lackner C, et al. Recommendations for uniform documentation according to trauma severity - The Utstein style. An international initiative of the International Trauma Anaesthesia and Critical Care Society (ITACCS). Part 2. *Notarzt* 2001;17(2):27-30.

Dick WF, Baskett P, Grande C, Deloos H, Kloeck W, Lackner C, et al. Recommendations for uniform documentation according to trauma severity - The Utstein style. An international initiative of the International Trauma Anaesthesia and Critical Care Society (ITACCS). *Anaesthesist* 2000;49(4):255-68.

Kobberling J. The CONSORT statement. *Med Klin* 1997;92(11):675-9.

Prisma (mianserin). *Munch Med Wochenschr* 1991;133(43):75.

MacPherson H, White A, Cummings M, Jobst K, Rose K, Niemtzow R, et al. Standards for reporting interventions in controlled trials of acupuncture: the STRICTA recommendations. *Chinese Journal of Evidence Based Medicine* 2003;3(3):231-4.

Esteban Calvo C, Ibez Ruiz C, Salgueiro V, Manso R. Impact of the spanish pharmacovigilance system recommendations on the publication of cases of adverse drug reactions. *Aten Primaria* 2008;40(11):555-8.

Ishida H. Systematic reviews for diagnostic test accuracy. *Jpn J Clin Chem* 2001;30(4):253-64.

Yang LJ, Zhen JC, Wu JH. Methodological advances of the overseas pharmaco-economic evaluation. *Chin Pharm J (China)* 2010;45(24):1978-80.

Russo P. Pharmaco-economic evaluations in the Italian regulatory context: A qualitative analysis of pricing and reimbursement dossiers. *Pharmacocon Ital Res Artic* 2008;10(2):59-75.

Hartmann M, Kath R. Quality of health economic studies in oncology and hematology. *Gesundh okon Qual manage* 2005;10(5):310-3.

Pedersen KM. Pharmaco-economics - Survey and status. *Ugeskr Laeger* 2003;165(16):1670-4.

Høydosebehandling med stamcellestøtte og statsrådstøtte. *Tidsskrift for den Norske laegeforening* 1996;116(21):2537-9.

Moher D, Schulz KF, Altman DG. The CONSORT statement: Revised recommendations for quality improvement of reports on randomized studies in parallel-design. *Schmerz* 2005;19(2):156-62.

Sendi PP, Bucher HC, Steurer J. Critical evaluation of a cost-effectiveness analysis. *Praxis* 1998;87(49):1695-702.

Persson U. Riktlinjer för ekonomisk utvärdering av läkemedel: är det något för Sverige. *Lakartidningen* 1997;(24):2289-92.

Gómez De La Cámara A, Magán Tapia P, Pérez Rivas F, Pastor Rodríguez-Moñino A. What do prognostic studies estimate? Survey of methods in published prognostic research. *Med Clin (Barc)* 2010;135(10):456-61.

María Eugenia Burgos D, Carlos Manterola D. Assessment of diagnostic test studies. *Rev Chil Cir* 2010;62(3):301-8.

Manterola C, Grande L. Methodological quality of articles on therapeutic procedures published in *Cirugía Española*. Evaluation of the period 2005-2008. *Cir Esp* 2010;87(4):244-50.

Vallvé C, Artés M, Cobo E. Non-randomized evaluation studies (TREND). *Med Clin (Barc)* 2005;125(SUPPL. 1):38-42.

Bühringer G, Watzl H. Publishing addiction science: International developments and their consequences for SUCHT. *Sucht* 2005;51(5):262-4.

Alfaro V. New proposals for improving the publication of clinical trials [3]. *Med Clin (Barc)* 2004;123(17):677.

Can MF, +ûzta+! M, Ya!°ci G, rk E, Yildiz R, Peker Y, et al. Quality of randomized controlled trial abstracts presented at the turkish national surgical congresses held in the last decade: An audit based on the CONSORT guidelines. *Turk J Surg* 2011;27(2):67-73.

Moreno A, ùlvarez-Sala JL, ln A, De Marino MA, çne E, ja-Alonso F, et al. Guidelines for the development and evolution of therapeutic guides: Recommendations for design and elaboration. *Med Clin (Barc)* 2007;128(3):100-10.

Quiñones D, Llorca J, Prieto-Salceda D, Delgado R. Quality of clinical trials published in Spain on asthma in comparison to trials in English language journals. *Arch Bronconeumol* 2002;38(12):574-9.

Petrak F, Hardt J, Nickel R, Egle UT. Checklist for evaluating scientific quality-controlled psychotherapeutic intervention studies (CPI). *Psychotherapeut* 1999;44(6):390-3.

Mihan L, Windeler J. Methodological quality of controlled studies in 'Medizinische Klinik': Analysis of work published between 1979 and 1996. *Med Klin* 1999;94(1):1-8.

Begg C, Cho C, Eastwood S, Horton R, Moher D, Olki I, et al. Improving the quality of reporting of randomized controlled trials. The CONSORT statement. *Med Klin* 1997;92(11):675-9.

Döpfmer S, Guggenmoos-Holzmann I. Meta-analysis. *Dtsch Med Wochenschr* 1997;122(18):589-93.

Costa LOP, Maher CG, Moseley AM, Sherrington C, Herbert RD, Elkins MR. Endorsement of trial registration and the CONSORT statement by the Revista Brasileira de Fisioterapia. *Rev Bras Fisioterapia* 2010;14(3):v-vi.

Moher D, Liberati A. Reporting systematic reviews and meta-analyses: Asking authors, peer reviewers, editors and funders to do better. *Med Clin (Barc)* 2010;135(11):505-6.

Iijima H, Osumi T, Koshimizu T. Development and analyses of evaluation criteria for meta-analysis - Relationship between renin-angiotensin system inhibitor and diabetes mellitus. *Yakugaku Zasshi* 2010;130(9):1215-23.

Koschack J. Neither holy grail nor devils work: A critical appraisal of meta-analysis. *Dtsch Med Wochenschr* 2009;134(48):2465-8.

Hou ZK, Li JS, Yu XQ, Li B, Zhou HY, Zhang YX. Quality appraisal of systematic reviews and Meta-analysis of pneumonia in China. *Chin Crit Care Med* 2009;21(4):207-10.

Timmer A, Richter B. Systematic review articles concerning treatment and prevention - An introduction to questions and answers. Part 2 - What defines a good review article? *Arzneimitteltherapie* 2008;26(7):252-5.

Wöckel A, Kreienberg R. Potentials for quality assurance by evidence-based guidelines. *Geburtshilfe Frauenheilkd* 2008;68(3):288-90.

Li TQ, Liu XM, Zhang MM, Ma JX, Du L, Zhou YD, et al. Assessment of systematic reviews and meta-analyses on traditional Chinese medicine published in Chinese journals. *Chin J Evid -Based Med* 2007;7(3):180-8.

Sun SQ, Wu XP, Dong SL, Zhu RF, Ming H. Evidence-based retrieval about Meta analysis. *Chin J Clin Rehab* 2006;10(10):158-60.

Preserve klinik Aali • Ymasindan elde edilen An sonuAlar, orta • Yiddetteki RA hastalarinin tedaviden yararlanabileceğini ortaya koydu. *SENDROM* 2011;23(3):16.

MacPherson H. Towards better reporting of interventions in clinical trials of acupuncture. *J Chin Integr Med* 2010;8(9):801-3.

Xiong J, Du YH, Li B, Shi L, Xu YY, Liu Q, et al. Assessment of methodology and report quality of systematic evaluation and meta-analysis of acupuncture-moxibustion in China. *Zhongguo zhenjiu* 2009 Sep;29(9):763-8.

Zhu MM, Zou HD. Appraisal of meta-analysis manuscripts on eye diseases published in Chinese journals with QUOROM statement and MOOSE guidelines. *Chung Hua Yen Ko Tsa Chih* 2011 Aug;47(8):732-7.

#### **Level 4 author/journal contact**

##### Reference List

Li J, Zhang X, Zhang M, Yuan W. Assessing the quality of RCTs on acupuncture for acute ischemic strokes [abstract]. XV Cochrane Colloquium; 2007 Oct 23-27; Sao Paulo, Brazil.

Junhua Z, Hongcai S, Xiumei G, Boli Z, Yaozu X, Hongbo C, et al. Methodology and reporting quality of systematic review/meta-analysis of traditional Chinese medicine. *J Altern Compl Med* 2007;13(8):797-805. (list of journals in non-English/French language)

## Appendix 5. Included reporting guidelines.

Arranged alphabetically by Guideline Focus

| Guideline focus            | Content area                                                                                                            | Reporting guideline and acronym(if applicable)                  | Citation*                                                                                                                                                                                                                                                                                                                                                                                                                                                               |
|----------------------------|-------------------------------------------------------------------------------------------------------------------------|-----------------------------------------------------------------|-------------------------------------------------------------------------------------------------------------------------------------------------------------------------------------------------------------------------------------------------------------------------------------------------------------------------------------------------------------------------------------------------------------------------------------------------------------------------|
| Animal studies, any design | Any area of bioscience research using laboratory animals                                                                | ARRIVE (Animal Research: Reporting In Vivo Experiments)         | Kilkenny, C., Browne, W. J., Cuthill, I. C., Emerson, M., and Altman, D. G.. Improving bioscience research reporting: the ARRIVE guidelines for reporting animal research. <i>PLoS Biology</i> . 2010; 8 (6): e1000412.<br><br><i>Also published in:</i><br><i>Journal of Pharmacology &amp; Pharmacotherapeutics</i> . 2010; 1 (2): 94-9.<br><i>British Journal of Pharmacology</i> . 2010; 160 (7): 1577-9.<br><i>Journal of Gene Medicine</i> . 2010; 12 (7): 561-3. |
| Animal trials              | Animal studies                                                                                                          | Gold standard publication checklist (GSPC)                      | Hooijmans, C. R., Leenaars, M., and Ritskes-Hoitinga, M.. A gold standard publication checklist to improve the quality of animal studies, to fully integrate the Three Rs, and to make systematic reviews more feasible. <i>ATLA Alternatives to Laboratory Animals</i> . 2010; 38:167-182.                                                                                                                                                                             |
| Basic science              | Homeopathy                                                                                                              | Reporting experiments in homeopathic basic research (REHBaR)    | Stock-Schroer, B., Albrecht, H., Betti, L., Endler, P. C., Linde, K., Ludtke, R., Musial, F., van Wijk R., Witt, C., and Baumgartner, S.. Reporting experiments in homeopathic basic research (REHBaR)--a detailed guideline for authors. <i>Homeopathy</i> . 2009; 98: 287–298.                                                                                                                                                                                        |
| Case reports               | Drugs and medical products that include herbal and complementary medicines, vaccines, and other biologicals and devices | Guidelines for Submitting Adverse Event Reports for Publication | Kelly, W. N., Arellano, F. M., Barnes, J., Bergman, U., Edwards, I. R., Fernandez, A. M., et al. Guidelines for submitting adverse event reports for publication. <i>Pharmacoepidemiol Drug Saf</i> . 2007; 16: 581e7.<br><br><i>Also published in:</i><br><i>Drug Safety</i> . 2007; 30 (5): 367-373.<br><i>Therapie</i> . 2009; 64 (4): 289-294.                                                                                                                      |



| <b>Guideline focus</b>                                   | <b>Content area</b>        | <b>Reporting guideline and acronym(if applicable)</b>                                                                                                                       | <b>Citation*</b>                                                                                                                                                                                                                                                                                                                                                                                                                       |
|----------------------------------------------------------|----------------------------|-----------------------------------------------------------------------------------------------------------------------------------------------------------------------------|----------------------------------------------------------------------------------------------------------------------------------------------------------------------------------------------------------------------------------------------------------------------------------------------------------------------------------------------------------------------------------------------------------------------------------------|
| Comparative effectiveness studies, nonrandomized studies | Secondary data sources     | International Society for Pharmacoeconomics and Outcomes Research (ISPOR) Good Research Practices reporting guidance for nonrandomized studies using secondary data sources | Berger, M. L., Mamdani, M., Atkins, D., and Johnson, M. L.. Good research practices for comparative effectiveness research: defining, reporting and interpreting nonrandomized studies of treatment effects using secondary data sources: the ISPOR Good Research Practices for Retrospective Database Analysis Task Force Report--Part I. International Society for Pharmacoeconomics and Outcomes Research. 2009; 12 (8): 1044–1052. |
| Diagnostic accuracy studies                              | General                    | Standards for Reporting of Diagnostic Accuracy (STARD): <a href="http://www.consort-statement.org">www.consort-statement.org</a>                                            | Bossuyt, P. M., Reitsma, J. B., Bruns, D. E., Gatsonis, C. A., Glasziou, P. P., Irwig, L. M., et al. Towards complete and accurate reporting of studies of diagnostic accuracy: the STARD initiative. Standards for reporting of diagnostic accuracy. Clin Chem. 2003; 49: 1e6.                                                                                                                                                        |
| Diagnostic accuracy studies                              | General                    | Checklist for Publications on Studies of Diagnostic Accuracy of Tests Used in Medical Case-Finding, Diagnosis, Prognosis, Risk Stratification, and Monitoring               | Bruns, D. E., Huth, E. J., Magid, E., and Young, D. S.. Toward a checklist for reporting of studies of diagnostic accuracy of medical tests. Clin Chem. 2000; 46: 893e5.                                                                                                                                                                                                                                                               |
| Diagnostic accuracy studies                              | Preschool vision screening | Uniform Guidelines for Reporting Results of Preschool Vision Screening Studies                                                                                              | Donahue, S. P., Arnold, R. W., and Ruben, J. B., AAPOS Vision Screening Committee. Preschool vision screening: what should we be detecting and how should we report it? Uniform guidelines for reporting results of preschool vision screening studies. J AAPOS. 2003; 7: 314e6.                                                                                                                                                       |
| Diagnostic accuracy studies                              | Paratuberculosis           | Standards for Reporting of Animal Diagnostic Accuracy Studies for paratuberculosis (STRADAS-paraTB)                                                                         | Gardner, I. A., Nielsen, S. S., Whittington, R. J., Collins, M. T., Bakker, D., Harris, B., Sreevatsan, S., Lombard, J. E., Sweeney, R., Smith, D. R., Gavalchin, J., and Eda, S.. Consensus-based reporting standards for diagnostic test accuracy studies for paratuberculosis in ruminants. Preventive Veterinary Medicine. 2011; 101: 18–34.                                                                                       |
| Economic evaluations                                     | General                    | Guidelines for authors and peer reviewers of economic submissions to the BMJ                                                                                                | Drummond, M. F. and Jefferson, T. O.. Guidelines for authors and peer reviewers of economic submissions to the BMJ. The BMJ Economic Evaluation Working Party. BMJ. 1996; 313: 275e83.                                                                                                                                                                                                                                                 |

| <b>Guideline focus</b> | <b>Content area</b>                                             | <b>Reporting guideline and acronym(if applicable)</b>                                                                                | <b>Citation*</b>                                                                                                                                                                                                                                                                                                                            |
|------------------------|-----------------------------------------------------------------|--------------------------------------------------------------------------------------------------------------------------------------|---------------------------------------------------------------------------------------------------------------------------------------------------------------------------------------------------------------------------------------------------------------------------------------------------------------------------------------------|
| Economic evaluations   | Drugs, devices, surgical procedures, or screening interventions | Good Research Practices for Cost-Effectiveness Analysis Alongside Clinical Trials: The ISPOR RCT-CEA Task Force Report               | Ramsey, S., Willke, R., Briggs, A., Brown, R., Buxton, M., Chawla, A., et al. Good research practices for cost-effectiveness analysis alongside clinical trials: the ISPOR RCT-CEA Task Force report. <i>Value Health</i> . 2005; 8: 521e33.                                                                                                |
| Economic evaluations   | Reference case analyses                                         | Checklist for reporting the reference case cost-effectiveness analysis                                                               | Siegel, J. E., Weinstein, M.C., Russell, L.B., and Gold, M.R.. Recommendations for reporting cost-effectiveness analyses. Panel on Cost-Effectiveness in Health and Medicine. <i>JAMA</i> . 1996; 276: 1339e41.<br><br><i>Also published in:</i><br><i>Pediatric AIDS and HIV Infection</i> . 1997; 8 (2): 130-134.                         |
| Economic evaluations   | Fall prevention strategies                                      | Checklist for conducting and reporting economic evaluations of fall prevention strategies                                            | Davis, J. C., Robertson, M. C., Comans, T., and Scuffham, P. A.. Guidelines for conducting and reporting economic evaluation of fall prevention strategies. <i>Osteoporos Int</i> . 2011; 22: 2449–2459.                                                                                                                                    |
| Economic evaluations   | Haemophilia prophylaxis                                         | Recommendations for reporting economic evaluations of haemophilia prophylaxis                                                        | Nicholson, A., Berger, K., Bohn, R., Carcao, M., Fischer, K., Gringeri, A., et al. Recommendations for reporting economic evaluations of haemophilia prophylaxis: a nominal groups consensus statement on behalf of the Economics Expert Working Group of The International Prophylaxis Study Group. <i>Haemophilia</i> . 2008; 14: 127e32. |
| Evaluation research    | Health informatics                                              | Statement on reporting of evaluation studies in Health Informatics (STARE-HI)                                                        | Talmon, J., Ammenwerth, E., Brender, J., De, K. N., Nykanen, P., and Rigby, M.. STARE-HI-Statement on reporting of evaluation studies in health informatics. <i>Int J Med Inf</i> . 2009; 78: 1e9.                                                                                                                                          |
| Evaluation research    | Interactive health communication                                | Evaluation Reporting Template for Interactive Health Communication Application: <a href="http://www.scipich.org">www.scipich.org</a> | Robinson, T. N., Patrick, K., Eng, T. R., and Gustafson D. An evidence-based approach to interactive health communication: a challenge to medicine in the information age. Science Panel on Interactive Communication and Health. <i>JAMA</i> . 1998; 280: 1264e9.                                                                          |

| <b>Guideline focus</b>   | <b>Content area</b>                              | <b>Reporting guideline and acronym(if applicable)</b>                                                                                                                                                 | <b>Citation*</b>                                                                                                                                                                                                                                                                                                                                                                |
|--------------------------|--------------------------------------------------|-------------------------------------------------------------------------------------------------------------------------------------------------------------------------------------------------------|---------------------------------------------------------------------------------------------------------------------------------------------------------------------------------------------------------------------------------------------------------------------------------------------------------------------------------------------------------------------------------|
| General                  | General                                          | Suggested format for research recommendations on the effects of treatments                                                                                                                            | Brown, P., Brunnhuber, K., Chalkidou, K., Chalmers, I., Clarke, M., Fenton, M., et al. How to formulate research recommendations. <i>BMJ</i> . 2006; 333: 804e6.                                                                                                                                                                                                                |
| General                  | Financial conflicts of interest                  | Financial Conflicts of Interest Checklist 2010 for clinical research studies.                                                                                                                         | Rochon, P. A., Hoey, J., Chan, A. W., Ferris, L. E., Lexchin, J., Kalkar, S. R., Sekeres, M., Wu, W., Van Laethem, M., and Gruneir, A.. Financial Conflicts of Interest Checklist 2010 for clinical research studies. <i>Open Medicine</i> . 2010; 4 (1): e69.                                                                                                                  |
| General                  | Communicating research funding source            | Acknowledgement of Funders in Scholarly Journal Articles                                                                                                                                              | Research Information Network. Acknowledgement of funders in scholarly journal articles: guidance for UK research funders, authors and publishers. Available at <a href="http://www.rin.ac.uk/system/files/attachments/sarah/Acknowledgement-funders-guidance.pdf">http://www.rin.ac.uk/system/files/attachments/sarah/Acknowledgement-funders-guidance.pdf</a> . February 2008. |
| General                  | Communicating company sponsored medical research | GPP2 (good publication practice) guidelines                                                                                                                                                           | Graf, C., Battisti, W. P., Bridges, D., Bruce-Winkler, V., Conaty, J. M., Ellison, J. M., Field, E. A., Gurr, J. A., Marx, M. E., Patel, M., Sanes-Miller, C., and Yarker, Y. E.. <i>Research Methods &amp; Reporting</i> . Good publication practice for communicating company sponsored medical research: the GPP2 guidelines. <i>BMJ</i> . 2009; 339: b4330.                 |
| General                  | Metabolic analyses                               | Standardization of Reporting Methods for Metabolic Analyses: A Draft Policy Document from the Standard Metabolic Reporting Structures Group: <a href="http://www.smrsgroup.org">www.smrsgroup.org</a> | Lindon, J. C., Nicholson, J. K., Holmes, E., Keun, H. C., Craig, A., Pearce, J. T., et al. Summary recommendations for standardization and reporting of metabolic analyses. <i>Nat Biotechnol</i> . 2005; 23: 833e8.                                                                                                                                                            |
| General, clinical trials | Bayesian analyses                                | Reporting Of Bayes Used in clinical Studies (ROBUST)                                                                                                                                                  | Sung, L., Hayden, J., Greenberg, M. L., Koren, G., Feldman, B. M., and Tomlinson, G. A.. Seven items were identified for inclusion when reporting a Bayesian analysis of a clinical study. <i>J Clin Epidemiol</i> . 2005; 58: 261e8.                                                                                                                                           |

| <b>Guideline focus</b>   | <b>Content area</b>                       | <b>Reporting guideline and acronym(if applicable)</b>                                                                                   | <b>Citation*</b>                                                                                                                                                                                                                                                                                                                                                                                                                         |
|--------------------------|-------------------------------------------|-----------------------------------------------------------------------------------------------------------------------------------------|------------------------------------------------------------------------------------------------------------------------------------------------------------------------------------------------------------------------------------------------------------------------------------------------------------------------------------------------------------------------------------------------------------------------------------------|
| General, clinical trials | Homeopathic treatments in clinical trials | Reporting data on homeopathic treatments (RedHot): www.redhot-homeopathy.info                                                           | Dean, M. E., Coulter, M. K., Fisher, P., Jobst, K., and Walach, H.. Reporting data on homeopathic treatments (RedHot): a supplement to CONSORT. Homeopathy. 2007; 96: 42e5.                                                                                                                                                                                                                                                              |
| General, clinical trials | Human biospecimens                        | Biospecimen reporting for improved study quality (BRISQ)                                                                                | Moore, H. M., Kelly, A. B., Jewell, S. D., McShane, L. M., Clark, D. P., Greenspan, R., Hayes, D. F., Hainaut, P., Kim, P., Mansfield, E. A., Potapova, O., Riegman, P., Rubinstein, Y., Seijo, E., Somiari, S., Watson, P., Weier, H. U., Zhu, C., and Vaught, J.. Biospecimen reporting for improved study quality (BRISQ). Cancer (Cancer Cytopathol). 2011; 119: 92–101.                                                             |
| General, clinical trials | Neutropenia                               | The design, analysis, and reporting of clinical trials on the empirical antibiotic management of the neutropenic patient                | Immunocompromised Host Society. The design, analysis, and reporting of clinical trials on the empirical antibiotic management of the neutropenic patient. Report of a consensus panel. J Infect Dis. 1990; 161: 397e401.<br><br><i>Alternate authorship list: Pizzo P.A., Armstrong D., Bodey G., De Pauw B., Feld R., Glauser M., Gaya H., Karp J., Klastersky J., Todeschini G., Verhoef J., Wade J., Young L.S., and Remington J.</i> |
| General, clinical trials | Pediatric brain tumors                    | Recommendations of the Brain Tumor Subcommittee for the Reporting of Trials                                                             | Gnekow, A. K.. Recommendations of the Brain Tumor Subcommittee for the reporting of trials. SIOP Brain Tumor Subcommittee. International Society of Pediatric Oncology. Med Pediatr Oncol. 1995; 24: 104e8.                                                                                                                                                                                                                              |
| General, clinical trials | Infantile spasms and West Syndrome        | West Delphi Consensus Statement - A Proposal for Case Definitions and Outcome Measures in Studies of Infantile Spasms and West Syndrome | Lux, A. L. and Osborne, J. P.. A proposal for case definitions and outcome measures in studies of infantile spasms and West syndrome: consensus statement of the West Delphi group. Epilepsia. 2004; 45: 1416e28.                                                                                                                                                                                                                        |
| General, clinical trials | Prostate specific antigen                 | Eligibility and Outcomes Reporting Guidelines for Clinical Trials for Patients in the State of a Rising Prostate-Specific Antigen       | Scher, H. I., Eisenberger, M., D'Amico, A. V., Halabi, S., Small, E. J., Morris, M., et al. Eligibility and outcomes reporting guidelines for clinical trials for patients in the state of a rising prostate-specific antigen: recommendations from the Prostate-Specific Antigen Working Group. J Clin Oncol. 2004; 22: 537e56.                                                                                                         |

| <b>Guideline focus</b>   | <b>Content area</b>                                                         | <b>Reporting guideline and acronym(if applicable)</b>                                                                | <b>Citation*</b>                                                                                                                                                                                                                                                                                                                                                   |
|--------------------------|-----------------------------------------------------------------------------|----------------------------------------------------------------------------------------------------------------------|--------------------------------------------------------------------------------------------------------------------------------------------------------------------------------------------------------------------------------------------------------------------------------------------------------------------------------------------------------------------|
| General, clinical trials | Rheumatoid arthritis                                                        | Reporting Exercise Studies in Low Back Pain                                                                          | Helmhout, P. H., Staal, J. B., Maher, C. G., Petersen, T., Rainville, J., Shaw, W. S., et al. Exercise therapy and low back pain: insights and proposals to improve the design, conduct, and reporting of clinical trials. <i>Spine</i> . 2008; 33: 1782e8.                                                                                                        |
| General, clinical trials | Nuclear magnetic resonance data and chemical shifts in rheumatoid arthritis | EULAR/ACR recommendations on reporting disease activity in clinical trials of patients with rheumatoid arthritis     | Aletaha, D., Landewe, R., Karonitsch, T., Bathon, J., Boers, M., Bombardieri, S., et al. Reporting disease activity in clinical trials of patients with rheumatoid arthritis: EULAR/ACR collaborative recommendations. <i>Ann Rheum Dis</i> . 2008; 67: 1360e4.<br><br><i>Also published in:</i><br><i>Arthritis Care and Research</i> . 2008; 59 (10): 1371-1377. |
| General, clinical trials | Intra-arterial cerebral thrombolysis for acute ischemic stroke              | Trial Design and Reporting standards for intra-arterial cerebral thrombolysis for acute ischemic stroke.             | Higashida, R. T., Furlan, A. J., Roberts, H., Tomsick, T., Connors, B., et al. Trial design and reporting standards for intra-arterial cerebral thrombolysis for acute ischemic stroke. <i>Stroke</i> . 2003; 34: e109e37.                                                                                                                                         |
| General, clinical trials | Endovascular revascularization for chronic ischemia of lower limb arteries  | Uniform reporting standards in studies assessing endovascular treatment for chronic ischaemia of lower limb arteries | Diehm, N., Baumgartner, I., Jaff, M., Do, D. D., Minar, E., Schmidli, J., et al. A call for uniform reporting standards in studies assessing endovascular treatment for chronic ischaemia of lower limb arteries. <i>Eur Heart J</i> . 2007; 28: 798e805.                                                                                                          |
| General, clinical trials | Carotid artery and supra-aortic trunk revascularization trials              | Standardized definitions and clinical endpoints in carotid artery and supra-aortic trunk revascularization trials    | Nedeltchev, K., Pattynama, P. M., Biainoo, G., Diehm, N., Jaff, M. R., Hopkins, L. N., Ramee, S., van Sambeek, M., Talen, A., Vermassen, F., and Cremonesi, A.. Standardized definitions and clinical endpoints in carotid artery and supra-aortic trunk revascularization trials. <i>Catheterization and Cardiovascular Interventions</i> . 2010; 76: 333–344.    |

| <b>Guideline focus</b>    | <b>Content area</b>                                | <b>Reporting guideline and acronym(if applicable)</b>                                                                                                | <b>Citation*</b>                                                                                                                                                                                                                                                                                                                                                                                                                                                           |
|---------------------------|----------------------------------------------------|------------------------------------------------------------------------------------------------------------------------------------------------------|----------------------------------------------------------------------------------------------------------------------------------------------------------------------------------------------------------------------------------------------------------------------------------------------------------------------------------------------------------------------------------------------------------------------------------------------------------------------------|
| General, clinical studies | Bleeding complications in acute coronary syndromes | Standardized reporting of bleeding complications for clinical investigations in acute coronary syndromes                                             | Rao, S. V., Eikelboom, J., Steg, P. G., Lincoff, A. M., Weintraub, W. S., Bassand, J. P., Rao, A. K., Gibson, C. M., Petersen, J. L., Mehran, R., Manoukian, S. V., Charnigo, R., Lee, K. L., Moscucci, M., and Harrington, R. A.. Standardized reporting of bleeding complications for clinical investigations in acute coronary syndromes: a proposal from the academic bleeding consensus (ABC) multidisciplinary working group. <i>Am Heart J.</i> 2009; 158: 881-886. |
| General, clinical studies | Parkinson's disease                                | Standard guidelines for publication of deep brain stimulation studies in Parkinson's disease (Guide4DBS-PD).                                         | Vitek, J. L., Lyons, K. E., Bakay, R., Benabid, A. L., Deuschl, G., Hallett, M., Kurlan, R., Pancrazio, J. J., Rezai, A., Walter, B. L., and Lang, A. E.. Standard guidelines for publication of deep brain stimulation studies in Parkinson's disease (Guide4DBS-PD). <i>Movement Disorders.</i> 2010; 25 (11): 1530–1537.                                                                                                                                                |
| In vitro studies          | Molecular interaction experiments                  | Minimum Information required for reporting a Molecular Interaction Experiment (MIMIx): <a href="http://www.psidev.info/">http://www.psidev.info/</a> | Orchard, S., Salwinski, L., Kerrien, S., Montecchi-Palazzi, L., Oesterheld, M., St€umpflen, V., et al. The minimum information required for reporting a molecular interaction experiment (MIMIx). <i>Nat Biotechnol.</i> 2007; 25: 894e8.                                                                                                                                                                                                                                  |
| In vitro studies          | Human embryonic stem cells                         | International community consensus standard for reporting derivation of human embryonic stem cell lines                                               | Stephenson, E. L., Braude, P. R., and Mason, C.. International community consensus standard for reporting derivation of human embryonic stem cell lines. <i>Regen Med.</i> 2007; 2: 349e62.                                                                                                                                                                                                                                                                                |
| In vitro studies          | Protein folding                                    | Standard set of experimental conditions and a preliminary kinetic data set of two-state proteins                                                     | Maxwell, K. L., Wildes, D., Zarrine-Afsar, A., De Los Rios, M. A., Brown, A. G., Friel, C. T., et al. Protein folding: defining a “standard” set of experimental conditions and a preliminary kinetic data set of two-state proteins. <i>Protein Sci.</i> 2005; 14: 602e16.                                                                                                                                                                                                |
| In vivo studies           | In situ hybridization and immunohistochemistry     | Minimum information specification for in situ hybridization and immunohistochemistry experiments (MISFISHIE)                                         | Deutsch, E. W., Ball, C. A., Berman, J. J., Bova, G. S., Brazma, A., Bumgarner, R. E., et al. Minimum information specification for in situ hybridization and immunohistochemistry experiments (MISFISHIE). <i>Nat Biotechnol.</i> 2008; 26: 305e12.                                                                                                                                                                                                                       |

| <b>Guideline focus</b>   | <b>Content area</b>                                     | <b>Reporting guideline and acronym(if applicable)</b>                                                             | <b>Citation*</b>                                                                                                                                                                                                                                                                                                                                                                                                                                                                                                                                                                                         |
|--------------------------|---------------------------------------------------------|-------------------------------------------------------------------------------------------------------------------|----------------------------------------------------------------------------------------------------------------------------------------------------------------------------------------------------------------------------------------------------------------------------------------------------------------------------------------------------------------------------------------------------------------------------------------------------------------------------------------------------------------------------------------------------------------------------------------------------------|
| Lab/pre-clinical studies | Reporting chemical shifts in solids                     | International Union of Pure and Applied Chemistry (IUPAC) recommendations 2008                                    | Harris, R. K., Becker, E. D., Cabral De Menezes, S. M., Granger, P., Hoffman, R. E., Zilm, K. W., et al. Further conventions for NMR shielding and chemical shifts IUPAC recommendations 2008. <i>Solid State Nucl Magn Reson.</i> 2008; 33: 41e56.<br><br><i>Also published in:</i><br><i>Pure and Applied Chemistry.</i> 2008; 80 (1): 59-84.<br><i>Magnetic Resonance in Chemistry.</i> 2008; 46 (6): 582-598.                                                                                                                                                                                        |
| Lab/pre-clinical studies | Nuclear magnetic resonance data                         | Recommendations for the presentation of Nuclear Magnetic Resonance (NMR) structures of proteins and nucleic acids | Markley, J. L., Bax, A., Arata, Y., Hilbers, C. W., Kaptein, R., Sykes, B. D., et al. Recommendations for the presentation of NMR structures of proteins and nucleic acids. IUPAC-IUBMB-IUPAB Inter-Union Task Group on the Standardization of Data Bases of Protein and Nucleic Acid Structures Determined by NMR Spectroscopy. <i>J Biomol NMR.</i> 1998; 12 (1): 1e23.<br><br><i>Also published in:</i><br><i>European Journal of Biochemistry.</i> 1998; 256 (1): 1-15.<br><i>Journal of Molecular Biology.</i> 1998; 280 (5): 933-952.<br><i>Pure and Applied Chemistry.</i> 1998; 70 (1): 117-142. |
| Lab/pre-clinical studies | Pathology interpretations within GLP toxicology studies | Best Practices for Reporting Pathology Interpretations with GLP Toxicology Studies                                | Morton, D., Kemp, R. K., Francke-Carroll, S., Jensen, K., McCartney, J., Monticello, T. M., et al. Best practices for reporting pathology interpretations within GLP toxicology studies. <i>Toxicol Pathol.</i> 2006; 34: 806e9.                                                                                                                                                                                                                                                                                                                                                                         |
| Lab/pre-clinical studies | Proteomics                                              | Minimum Information About a Proteomics Experiment (MIAPE): <a href="http://psidev.info">http://psidev.info</a>    | Taylor, C. F., Paton, N. W., Lilley, K. S., Binz, P. A., Julian, R. K. Jr., Jones, A. R., et al. The minimum information about a proteomics experiment (MIAPE). <i>Nat Biotechnol.</i> 2007; 25: 887e93.                                                                                                                                                                                                                                                                                                                                                                                                 |

| <b>Guideline focus</b>   | <b>Content area</b>                         | <b>Reporting guideline and acronym(if applicable)</b>                                                                                                 | <b>Citation*</b>                                                                                                                                                                                                                                                                                                                                                                                                                                                                                                                                                                                                                         |
|--------------------------|---------------------------------------------|-------------------------------------------------------------------------------------------------------------------------------------------------------|------------------------------------------------------------------------------------------------------------------------------------------------------------------------------------------------------------------------------------------------------------------------------------------------------------------------------------------------------------------------------------------------------------------------------------------------------------------------------------------------------------------------------------------------------------------------------------------------------------------------------------------|
| Lab/pre-clinical studies | Mass spectrometry in proteomics experiments | Minimum Information about a Proteomics Experiment - Mass Spectrometry (MIAPE-MS): <a href="http://psidev.info">http://psidev.info</a>                 | Taylor, C. F., Binz, P.-A., Aebersold, R., Affolter, M., Barkovich, R., Deutsch, E. W., et al. Guidelines for reporting the use of mass spectrometry in proteomics. <i>Nat Biotechnol.</i> 2008; 26: 860e1.                                                                                                                                                                                                                                                                                                                                                                                                                              |
| Lab/pre-clinical studies | CPR research                                | Utstein-Style Guidelines for Uniform Reporting of Laboratory CPR Research                                                                             | Idris, A. H., Becker, L. B., Ornato, J. P., Hedges, J. R., Bircher, N. G., Chandra, N. C., et al. Utstein-style guidelines for uniform reporting of laboratory CPR research. A statement for healthcare professionals from a task force of the American Heart Association, the American College of Emergency Physicians, the American College of Cardiology, the European Resuscitation Council, the Heart and Stroke Foundation of Canada, the Institute of Critical Care Medicine, the Safar Center for Resuscitation Research, and the Society for Academic Emergency Medicine. Writing Group. <i>Circulation.</i> 1996; 94: 2324e36. |
| Observational studies    | General                                     | Strengthening the Reporting of Observational Studies in Epidemiology (STROBE): <a href="http://www.strobe-statement.org">www.strobe-statement.org</a> | von Elm, E., Altman, D. G., Egger, M., Pocock, S. J., Gotsche, P. C., and Vandembroucke, J. P., STROBE Initiative. The Strengthening the Reporting statement: guidelines for reporting observational studies. <i>PLoS Med.</i> 2007; 4: e296.                                                                                                                                                                                                                                                                                                                                                                                            |
| Observational studies    | General                                     | Quality of Reporting of Observational Longitudinal Research                                                                                           | Tooth, L., Ware, R., Bain, C., Purdie, D. M., and Dobson, A. Quality of reporting of observational longitudinal research. [see comment]. <i>Am J Epidemiol.</i> 2005; 161: 280e8.                                                                                                                                                                                                                                                                                                                                                                                                                                                        |
| Observational studies    | Genetic association studies                 | Strengthening the Reporting of Genetic Association studies (STREGA): <a href="http://www.strega-statement.org">www.strega-statement.org</a>           | Little J, Higgins JP, Ioannidis JP, Moher D, Gagnon F, von Elm E, et al. Strengthening the Reporting of Genetic Association Studies (STREGA): an extension of the STROBE statement. <i>PLoS Med</i> 2009; 6: e22.                                                                                                                                                                                                                                                                                                                                                                                                                        |



| Guideline focus       | Content area                             | Reporting guideline and acronym(if applicable)                                                                                             | Citation*                                                                                                                                                                                                                                                                                                                                                                                                                                                                                                                                                                                                                                                 |
|-----------------------|------------------------------------------|--------------------------------------------------------------------------------------------------------------------------------------------|-----------------------------------------------------------------------------------------------------------------------------------------------------------------------------------------------------------------------------------------------------------------------------------------------------------------------------------------------------------------------------------------------------------------------------------------------------------------------------------------------------------------------------------------------------------------------------------------------------------------------------------------------------------|
| Observational studies | Biomarkers, Molecular Epidemiology       | Strengthening the Reporting of Observational Studies in Epidemiology – Molecular Epidemiology (STROBE-ME)<br>www.strobe-statement.org      | Gallo, V., Egger, M., McCormack, V., Farmer, P. B., Ioannidis, J. P., Kirsch-Volders, M., Matullo, G., Phillips, D. H., Schoket, B., Stromberg, U., Vermeulen, R., Wild, C., Porta, M., and Vineis, P.. STrengthening the Reporting of OBservational studies in Epidemiology - Molecular Epidemiology (STROBE-ME): An extension of the STROBE statement. <i>Eur J Clin Invest.</i> 2011; DOI: 10.1111/j.1365-2362.2011.02561.x (epub ahead of print). Print citation: 2012 Jan; 42(1): 1-16.                                                                                                                                                              |
| Observational studies | Tumour markers                           | Reporting recommendations for tumour marker prognostic studies (REMARK): www.cancerdiagnosis.nci.nih.gov/assessment/progress/clinical.html | McShane, L. M., Altman, D. G., Sauerbrei, W., Taube, S. E., Gion, M., Clark, G. M., et al. REporting recommendations for tumour MARKer prognostic studies (REMARK). <i>Eur J Cancer.</i> 2005; 41: 1690e6.<br><br><b>Also published in:</b><br><i>Journal of the National Cancer Institute.</i> 2005; 97 (16): 1180-1184.<br><i>Nature Clinical Practice Oncology.</i> 2005; 2 (8): 416-422.<br><i>British Journal of Cancer.</i> 2005; 93 (4): 387-391.<br><i>Journal of Clinical Oncology.</i> 2005; 23 (36): 9067-9072.<br><i>Experimental Oncology.</i> 2006; 28 (2): 99-105.<br><i>Breast Cancer Research and Treatment.</i> 2006; 100 (2): 229-235. |
| Observational studies | Rheumatoid arthritis biologics registers | Reporting safety data of biologic registers in rheumatology                                                                                | Dixon, W. G., Carmona, L., Finckh, A., Hetland, M. L., Kvien, T. K., Landewe, R., Listing, J., Nicola, P.J., Tarp, U., Zink, A., and Askling, J.. EULAR points to consider when establishing, analysing and reporting safety data of biologics registers in rheumatology. <i>Ann Rheum Dis.</i> 2010; 69: 1596–1602.                                                                                                                                                                                                                                                                                                                                      |
| Observational studies | Rheumatic disorders                      | OMERACT IV recommendations for reporting of longitudinal observational studies in rheumatology                                             | Wolfe, F., Lassere, M., van der, H. D., Stucki, G., Suarez-Almazor, M., Pincus, T., et al. Preliminary core set of domains and reporting requirements for longitudinal observational studies in rheumatology. <i>J Rheumatol.</i> 1999; 26: 484e9.                                                                                                                                                                                                                                                                                                                                                                                                        |

| <b>Guideline focus</b>       | <b>Content area</b>                          | <b>Reporting guideline and acronym(if applicable)</b>                                                                                                                                                        | <b>Citation*</b>                                                                                                                                                                                                                                                                                                                                      |
|------------------------------|----------------------------------------------|--------------------------------------------------------------------------------------------------------------------------------------------------------------------------------------------------------------|-------------------------------------------------------------------------------------------------------------------------------------------------------------------------------------------------------------------------------------------------------------------------------------------------------------------------------------------------------|
| Observational studies        | Trigeminal neuralgia                         | Recommendations for future reports on surgical management of trigeminal neuralgia                                                                                                                            | Zakrzewska, J. M. and Lopez, B. C.. Quality of reporting in evaluations of surgical treatment of trigeminal neuralgia: recommendations for future reports. <i>Neurosurgery</i> . 2003; 53: 110e20.                                                                                                                                                    |
| Observational studies        | Spinal cord injury                           | Reporting spinal cord injury (SCI) studies                                                                                                                                                                   | DeVivo, M. J., Biering-Sorensen, F., New, P., and Chen, Y.. Standardization of data analysis and reporting of results from the International Spinal Cord Injury Core Data Set. <i>Spinal Cord</i> . 2011; 49: 596–599.                                                                                                                                |
| Prospective clinical studies | Behavioural interventions and public health  | Transparent Reporting of Evaluations with Non-randomized Designs (TREND): <a href="http://www.TREND-statement.org">www.TREND-statement.org</a>                                                               | Des Jarlais, D. C., Lyles, C., and Crepaz, N.. TREND Group. Improving the reporting quality of nonrandomized evaluations of behavioral and public health interventions: the TREND statement. <i>Am J Public Health</i> . 2004; 94: 361e6.                                                                                                             |
| Prospective clinical studies | Intervention studies of nosocomial infection | Outbreak Reports and Intervention Studies Of Nosocomial infection(ORION): <a href="http://www.idrn.org/orion.php">www.idrn.org/orion.php</a>                                                                 | Stone, S. P., Cooper, B. S., Kibbler, C. C., Cookson, B. D., Roberts, J.A., Medley, G. F., et al. The ORION statement: guidelines for transparent reporting of outbreak reports and intervention studies of nosocomial infection. <i>Lancet Infect Dis</i> . 2007; 7: 282e8.                                                                          |
| Prospective clinical studies | Anticancer drugs                             | Guidelines for reporting a Phase I Cancer Trial in a conference abstract                                                                                                                                     | Strevel, E. L., Chau, N. G., Pond, G. R., Murgo, A. J., Ivy, P. S., and Siu, L. L.. Improving the quality of abstract reporting for phase I cancer trials. <i>Clin Cancer Res</i> . 2008; 14: 1782e7.                                                                                                                                                 |
| Prospective clinical studies | Acute graft-versus-host disease              | Recommendations for reporting results of Graft-Versus-Host Disease (GVHD) prevention trials                                                                                                                  | Przepiorka, D., Weisdorf, D., Martin, P., Klingemann, H. G., Beatty, P., Hows, J., et al. 1994 Consensus conference on acute GVHD grading. <i>Bone Marrow Transplant</i> . 1995; 15: 825e8.                                                                                                                                                           |
| Prospective clinical studies | Acute myeloid leukaemia                      | Revised Recommendations of the International Working Group for Diagnosis, Standardization of Response Criteria, Treatment Outcomes, and Reporting Standards for Therapeutic Trials in Acute Myeloid Leukemia | Cheson, B. D., Bennett, J. M., Kopecky, K. J., Buchner, T., Willman, C.L., Estey, E. H., et al. Revised recommendations of the International Working Group for Diagnosis, Standardization of Response Criteria, Treatment Outcomes, and Reporting Standards for Therapeutic Trials in Acute Myeloid Leukemia. <i>J Clin Oncol</i> . 2003; 21: 4642e9. |

| <b>Guideline focus</b>       | <b>Content area</b>                                       | <b>Reporting guideline and acronym(if applicable)</b>                                                                                   | <b>Citation*</b>                                                                                                                                                                                                                                    |
|------------------------------|-----------------------------------------------------------|-----------------------------------------------------------------------------------------------------------------------------------------|-----------------------------------------------------------------------------------------------------------------------------------------------------------------------------------------------------------------------------------------------------|
| Qualitative research         | Psychology and social sciences                            | Evolving Guidelines for Publication of Qualitative Research Studies in Psychology and Related Fields                                    | Elliott, R., Fischer, C. T., and Rennie, D. L.. Evolving guidelines for publication of qualitative research studies in psychology and related fields. <i>Br J Clin Psychol.</i> 1999; 38(Pt 3): 215e29.                                             |
| Qualitative, observational   | Participatory Action Research, Counseling psychology      | Best Practices in the Reporting of Participatory Action Research (PAR)                                                                  | Smith, L., Rosenzweig, L., and Schmidt, M.. Best Practices in the Reporting of Participatory Action Research: Embracing Both the Forest and the Trees. <i>The Counseling Psychologist.</i> 2010; 38(8): 1115–1138.                                  |
| Quality improvement studies  | General                                                   | Standards for Quality Improvement Reporting Excellence (SQUIRE): <a href="http://www.squire-statement.org">www.squire-statement.org</a> | Davidoff, F., Batalden, P., Stevens, D., Ogrinc, G., and Mooney, S.. Publication guidelines for quality improvement studies in health care: Evolution of the SQUIRE project. <i>J Gen Intern Med.</i> 2008; 23: 2125e30.                            |
| Randomized controlled trials | General                                                   | Checklist of Information for Inclusion in Reports of Clinical Trials                                                                    | Asilomar Working Group. Checklist of information for inclusion in reports of clinical trials. The Asilomar Working Group on Recommendations for Reporting of Clinical Trials in the Biomedical Literature. <i>Ann Intern Med.</i> 1996; 124: 741e3. |
| Randomized controlled trials | General                                                   | Checklist to be used by authors when preparing or by readers when analyzing a report of a randomized controlled trial                   | Moher, D., Standards of Reporting Trials (SORT) Group. A proposal for structured reporting of randomized controlled trials. <i>JAMA.</i> 1994; 272: 1926e31.                                                                                        |
| Randomized controlled trials | Cluster randomized trials                                 | CONSORT Statement: extension to cluster randomised trials: <a href="http://www.consort-statement.org">www.consort-statement.org</a>     | Campbell, M. K., Elbourne, D. R., and Altman, D. G.. CONSORT statement: extension to cluster randomised trials. <i>BMJ.</i> 2004; 328: 702e8.                                                                                                       |
| Randomized controlled trials | Intracluster correlation coefficients from cluster trials | Framework for the reporting of intracluster correlation coefficients in cluster randomized trials                                       | Campbell, M. K., Grimshaw, J. M., and Elbourne, D. R.. Intracluster correlation coefficients in cluster randomized trials: empirical insights into how should they be reported. <i>BMC Med Res Methodol.</i> 2004; 4: 9.                            |

| <b>Guideline focus</b>       | <b>Content area</b>                                                           | <b>Reporting guideline and acronym(if applicable)</b>                                                                                                                                       | <b>Citation*</b>                                                                                                                                                                                                                                                                                                                                                                                                                                                                                                               |
|------------------------------|-------------------------------------------------------------------------------|---------------------------------------------------------------------------------------------------------------------------------------------------------------------------------------------|--------------------------------------------------------------------------------------------------------------------------------------------------------------------------------------------------------------------------------------------------------------------------------------------------------------------------------------------------------------------------------------------------------------------------------------------------------------------------------------------------------------------------------|
| Randomized controlled trials | Noninferiority and equivalence randomized trials                              | Reporting of Noninferiority and Equivalence Randomized Trials: An Extension of the CONSORT Statement: <a href="http://www.consort-statement.org">www.consort-statement.org</a>              | Piaggio, G., Elbourne, D. R., Altman, D. G., Pocock, S. J., Evans, S. J., CONSORT Group. Reporting of noninferiority and equivalence randomized trials: an extension of the CONSORT statement. <i>JAMA</i> . 2006; 295: 1152e60.                                                                                                                                                                                                                                                                                               |
| Randomized controlled trials | Journal and conference abstracts                                              | CONSORT for reporting randomised trials in journal and conference abstracts: <a href="http://www.consort-statement.org">www.consort-statement.org</a>                                       | Hopewell, S., Clarke, M., Moher, D., Wager, E., Middleton, P., Altman, D. G., et al. CONSORT for reporting randomised trials in journal and conference abstracts. <i>Lancet</i> . 2008; 371: 281e3.                                                                                                                                                                                                                                                                                                                            |
| Randomized controlled trials | Abstracts submitted to meetings of the American Society for Clinical Oncology | Proposed Guidelines for Reporting a Randomized Trial in a Conference Abstract                                                                                                               | Krzyzanowska, M. K., Pintilie, M., Brezden-Masley, C., Dent, R., and Tannock, I. F.. Quality of abstracts describing randomized trials in the proceedings of American Society of Clinical Oncology meetings: guidelines for improved reporting. <i>J Clin Oncol</i> . 2004; 22: 1993e9.                                                                                                                                                                                                                                        |
| Randomized controlled trials | Harms                                                                         | Better reporting of harms in randomized trials: An extension of the CONSORT Statement: <a href="http://www.consort-statement.org">www.consort-statement.org</a>                             | Ioannidis, J. P., Evans, S. J., Gotzsche, P. C., O'Neill, R. T., Altman, D. G., Schulz, K., et al. Better reporting of harms in randomized trials: an extension of the CONSORT statement. <i>Ann Intern Med</i> . 2004; 141: 781e8.                                                                                                                                                                                                                                                                                            |
| Randomized controlled trials | Non-pharmacologic treatments                                                  | Consolidated Standards of Reporting Trials extension for non-pharmacologic treatments (CONSORT extension for NPT): <a href="http://www.consort-statement.org">www.consort-statement.org</a> | Boutron, I., Moher, D., Altman, D. G., Schulz, K. F., Ravaud, P., CONSORT Group. Methods and processes of the CONSORT Group: example of an extension for trials assessing nonpharmacologic treatments. <i>Ann Intern Med</i> . 2008; 148: W60e6.<br><br><b><i>Explanation and elaboration document:</i></b><br><i>Annals of Internal Medicine</i> . 2008; 148 (4): 295-309.<br><i>Journal of Chinese Integrative Medicine</i> . 2009; 7 (7): 690-699.<br><i>Journal of Chinese Integrative Medicine</i> . 2009 7 (5): 491-494. |

| <b>Guideline focus</b>       | <b>Content area</b>    | <b>Reporting guideline and acronym(if applicable)</b>                                                                                                                  | <b>Citation*</b>                                                                                                                                                                                                                                                                                                                                                                                                                                                                                                                                    |
|------------------------------|------------------------|------------------------------------------------------------------------------------------------------------------------------------------------------------------------|-----------------------------------------------------------------------------------------------------------------------------------------------------------------------------------------------------------------------------------------------------------------------------------------------------------------------------------------------------------------------------------------------------------------------------------------------------------------------------------------------------------------------------------------------------|
| Randomized controlled trials | Herbal interventions   | Consolidated Standards of Reporting Trials extension for Herbal Medicine Interventions (CONSORT for Herbal Interventions)                                              | Gagnier, J. J., Boon, H., Rochon, P., Moher, D., Barnes, J., Bombardier, C., et al. Reporting randomized, controlled trials of herbal interventions: an elaborated CONSORT statement. <i>Ann Intern Med.</i> 2006; 144: 364e7.<br><br><b>Also published in:</b><br><i>Explore: The Journal of Science &amp; Healing.</i> 2006; 2(2): 143-9. Alternate title: <i>Reporting random controlled trials of herbal medicines.</i><br><br><b>Explanation and elaboration document:</b><br><i>Journal of Clinical Epidemiology.</i> 2006; 59 (11): 1134-49. |
| Randomized controlled trials | Chinese materia medica | Consolidated Standards for Reporting Trials of Traditional Chinese Medicine: <a href="http://www.consort-statement.org">www.consort-statement.org</a>                  | Wu, T.-X., Li, Y.-P., Bian, Z.-X., Li, T.-Q., Li, J., Dagenais, S., et al. Consolidated standards for reporting trials of traditional Chinese medicine (CONSORT for TCM) (for solicitation of comments). <i>Chin J Evid Based Med.</i> 2007; 7: 625e30.<br><br><b>Also published in:</b><br><i>Fronteras en Medicina.</i> 2011; 5 (2): 171-7.                                                                                                                                                                                                       |
| Randomized controlled trials | Acupuncture            | Standards for Reporting interventions in Controlled Trials of Acupuncture (STRICTA): <a href="http://www.ftcm.org.uk/stricta">www.ftcm.org.uk/stricta</a>              | Macpherson, H., White, A., Cummings, M., Jobst, K. A., Rose, K., Niemtzw, R. C., et al. Standards for Reporting Interventions in Controlled Trials of Acupuncture: the STRICTA recommendations. <i>J Altern Complement Med.</i> 2002; 8: 85e9.                                                                                                                                                                                                                                                                                                      |
| Randomized controlled trials | Acupuncture            | Standards for Reporting interventions in Controlled Trials of Acupuncture (STRICTA) (2010 update) <a href="http://www.ftcm.org.uk/stricta">www.ftcm.org.uk/stricta</a> | MacPherson, H., Altman, D. G., Hammerschlag, R., Youping, L., Taixiang, W., White, A., and Moher, D.. Revised STAndards for Reporting Interventions in Clinical Trials of Acupuncture (STRICTA): extending the CONSORT statement. <i>PLoS Med.</i> 2010; 7(6): e1000261.                                                                                                                                                                                                                                                                            |

| Guideline focus              | Content area                    | Reporting guideline and acronym(if applicable)                                                                   | Citation*                                                                                                                                                                                                                                                                                                                                                                                                                                                                                   |
|------------------------------|---------------------------------|------------------------------------------------------------------------------------------------------------------|---------------------------------------------------------------------------------------------------------------------------------------------------------------------------------------------------------------------------------------------------------------------------------------------------------------------------------------------------------------------------------------------------------------------------------------------------------------------------------------------|
| Randomized controlled trials | Chronic pain                    | Measuring and Reporting Chronic Pain Outcomes in Randomized Controlled Trials                                    | Grant, M. D. and Samson, D.. Special report: measuring and reporting pain outcomes in randomized controlled trials. Technol Eval Cent Asses Program Exec Summ. 2006; 21(11): 1e2.                                                                                                                                                                                                                                                                                                           |
| Randomized controlled trials | Exercise and low back pain      | CONSORT extension for Pragmatic Trials: <a href="http://www.consort-statement.org">www.consort-statement.org</a> | Zwarenstein, M., Treweek, S., Gagnier, J. J., Altman, D. G., Tunis, S., Haynes, B., et al. Improving the reporting of pragmatic trials: an extension of the CONSORT statement. <i>BMJ</i> . 2008; 337: a2390.<br><br><i>Also published in:</i><br><i>Journal of Chinese Integrative Medicine</i> . 2009; 7 (4): 392-397.<br><i>BMJ</i> . 2008; 337 (7680): 1223-1226.                                                                                                                       |
| Randomized controlled trials | Allergen-specific immunotherapy | The CONSORT statement checklist in allergen-specific immunotherapy: a GA <sup>2</sup> LEN paper                  | Bousquet, P. J., Brozek, J., Bachert, C., Bieber, T., Bonini, S., Burney, P., Calderon, M., Canonica, G. W., Compalati, E., Daures, J. P., Delgado, L., Demoly, P., Dahl, R., Durham, S. R., Kowalski, M. L., Malling, H. J., Merk, H., Papadopoulos, N., Passalacqua, G., Simon, H. U., Worms, M., Wahn, U., Zuberbier, T., Schunemann, H. J., and Bousquet, J.. The CONSORT statement checklist in allergen-specific immunotherapy: a GA2LEN paper. <i>Allergy</i> . 2009; 64: 1737–1745. |

| Guideline focus              | Content area                   | Reporting guideline and acronym(if applicable)                                                | Citation*                                                                                                                                                                                                                                                                                                                                                                                                                                                                                                                                                                                                                                                                                                                                                                                                                                                                                                                                                                                                                                |
|------------------------------|--------------------------------|-----------------------------------------------------------------------------------------------|------------------------------------------------------------------------------------------------------------------------------------------------------------------------------------------------------------------------------------------------------------------------------------------------------------------------------------------------------------------------------------------------------------------------------------------------------------------------------------------------------------------------------------------------------------------------------------------------------------------------------------------------------------------------------------------------------------------------------------------------------------------------------------------------------------------------------------------------------------------------------------------------------------------------------------------------------------------------------------------------------------------------------------------|
| Randomized controlled trials | Live stock and food safety     | REFLECT (Reporting guidELines For randomized controLled trials for livEstoCk and food safeTy) | <p>O'Connor, A. M., Sargeant, J. M., Gardner, I. A., Dickson, J. S., Torrence, M. E., Dewey, C. E., Dohoo, I. R., Evans, R. B., Gray, J. T., Greiner, M., Keefe, G., Lefebvre, S. L., Morley, P. S., Ramirez, A., Sisco, W., Smith, D. R., Snedeker, K., Sofos, J., Ward, M. P., and Wills, R.. The REFLECT statement: methods and processes of creating reporting guidelines for randomized controlled trials for livestock and food safety by modifying the CONSORT statement. <i>Zoonoses Public Health</i>. 2010; 57: 95–104.</p> <p><b>Also published in:</b><br/> <i>Journal of Veterinary Internal Medicine</i>. 2010; 24 (1): 57-64.<br/> <i>Zoonoses &amp; Public Health</i>. 2010; 57 (2): 105-36.<br/> <i>Preventive Veterinary Medicine</i>. 2010; 93 (1): 11-8.<br/> <i>Journal of Food Protection</i>. 2010; 73 (1): 132-9.<br/> <i>Journal of Swine Health and Protection</i> 2010; 18 (1): 18-26.</p> <p><b>Explanation and elaboration document:</b><br/> <i>Journal of Food Protection</i>. 2010; 73 (3): 579-603.</p> |
| Randomized controlled trials | Renal artery revascularization | Guidelines for the Reporting of Renal Artery Revascularization in Clinical Trials             | <p>Rundback, J. H., Sacks, D., Kent, K. C., Cooper, C., Jones, D., Murphy, T., et al. Guidelines for the reporting of renal artery revascularization in clinical trials. American Heart Association. <i>Circulation</i>. 2002; 106: 1572e85.</p> <p><b>Also published in:</b><br/> <i>Journal of Vascular and Interventional Radiology</i>. 2002; 13 (10): 959-974.<br/> <i>Journal of Vascular and Interventional Radiology</i>. 2003; 14 (9, pt.2): S477-S492.</p>                                                                                                                                                                                                                                                                                                                                                                                                                                                                                                                                                                     |

| Guideline focus                                                                             | Content area                | Reporting guideline and acronym(if applicable)                                          | Citation*                                                                                                                                                                                                                                                                                                                                                                                                                                              |
|---------------------------------------------------------------------------------------------|-----------------------------|-----------------------------------------------------------------------------------------|--------------------------------------------------------------------------------------------------------------------------------------------------------------------------------------------------------------------------------------------------------------------------------------------------------------------------------------------------------------------------------------------------------------------------------------------------------|
| Randomized controlled trials, observational studies                                         | Image-guided tumor ablation | Image-guided tumor ablation: standardization of terminology and reporting criteria      | <p>Goldberg, S. N., Grassi, C. J., Cardella, J. F., Charboneau, J. W., Dodd, G. D. III, Dupuy, D. E., et al. Image-guided tumor ablation: standardization of terminology and reporting criteria. <i>Radiology</i>. 2005; 235: 728e39.</p> <p><b>Also published in:</b><br/> <i>Journal of Vascular and Interventional Radiology</i>. 2005; 16 (6): 765-778.<br/> <i>Journal of Vascular and Interventional Radiology</i>. 2009; 20 (7): S377-S390.</p> |
| Randomized controlled trials, Quasi-experimental studies, systematic reviews, meta-analyses | General                     | Journal Article Reporting Standards (JARS) and Meta-analysis Reporting Standards (MARS) | <p>APA Publications and Communications Board Working Group on Journal Article Reporting Standards. Reporting standards for research in psychology: why do we need them? What might they be? <i>Am Psychol</i>. 2008; 63: 839e51.</p>                                                                                                                                                                                                                   |
| Standardized patient research reports                                                       | Medical education           | Proposed reporting standards for standardised patient (SP) research reports             | <p>Howley, L., Szauter, K., Perkowski, L., Clifton, M., McNaughton, N., Association of Standardized Patient Educators (ASPE). Quality of standardised patient research reports in the medical education literature: review and recommendations. <i>Med Educ</i>. 2008; 42: 350e8.</p>                                                                                                                                                                  |



| Guideline focus                   | Content area                            | Reporting guideline and acronym(if applicable)                                                                                                      | Citation*                                                                                                                                                                                                                                                                                                                                                                                                                                                                                                |
|-----------------------------------|-----------------------------------------|-----------------------------------------------------------------------------------------------------------------------------------------------------|----------------------------------------------------------------------------------------------------------------------------------------------------------------------------------------------------------------------------------------------------------------------------------------------------------------------------------------------------------------------------------------------------------------------------------------------------------------------------------------------------------|
| Systematic reviews, meta-analyses | General                                 | Quality of Reporting of Meta-analyses Statement (QUOROM)                                                                                            | Moher, D., Cook, D. J., Eastwood, S., Olkin, I., Rennie, D., and Stroup, D. F.. Improving the quality of reports of meta-analyses of randomised controlled trials: the QUOROM statement. <i>Quality of Reporting of Meta-analyses</i> . <i>Lancet</i> . 1999; 354: 1896e900.<br><br><i>Also published in:</i><br><i>Onkologie</i> . 2000; 23 (6): 597-602.<br><br><i>British journal of surgery</i> . 2000; 87 (11): 1448-1454.<br><br><i>Revista Espanola de Salud Publica</i> . 2000; 74 (2): 107-118. |
| Systematic reviews, meta-analyses | General                                 | Preferred Reporting Items for Systematic Reviews and Meta-Analyses (PRISMA): <a href="http://www.prisma-statement.org">www.prisma-statement.org</a> | Moher, D., Liberati, A., Tetzlaff, J., Altman, D. G., the PRISMA Group. Preferred reporting items for systematic reviews and meta-analyses: the PRISMA Statement. <i>PLoS Med</i> . 2009; 6: e1000097.                                                                                                                                                                                                                                                                                                   |
| Systematic reviews, meta-analyses | General                                 | Meta-analysis Of Observational Studies in Epidemiology (MOOSE)                                                                                      | Stroup, D. F., Berlin, J. A., Morton, S. C., Olkin, I., Williamson, G. D., Rennie, D., et al. Meta-analysis of observational studies in epidemiology: a proposal for reporting. Meta-analysis Of Observational Studies in Epidemiology (MOOSE) group. <i>JAMA</i> . 2000; 283: 2008e12.                                                                                                                                                                                                                  |
| Undefined                         | Methodology; reliability and agreement  | Guidelines for Reporting Reliability and Agreement Studies (GRRAS)                                                                                  | Kottner, J., Audige, L., Brorson, S., Donner, A., Gajewski, B. J., Hrobjartsson, A., Roberts, C., Shoukri, M., and Streiner, D. L.. Guidelines for Reporting Reliability and Agreement Studies (GRRAS) were proposed. <i>Journal of Clinical Epidemiology</i> . 2011; 64: 96-106.                                                                                                                                                                                                                        |
| Undefined                         | Emergency medicine and prehospital care | Recommended guidelines for reporting on emergency medical dispatch when conducting research in emergency medicine: The Utstein style                | Castren, M., Karlsten, R., Lippert, F., Christensen, E. F., Bovim, E., Kvam, A. M., et al. Recommended guidelines for reporting on emergency medical dispatch when conducting research in emergency medicine: The Utstein style. <i>Resuscitation</i> . 2008; 79: 193e7.                                                                                                                                                                                                                                 |

| <b>Guideline focus</b> | <b>Content area</b>                                                   | <b>Reporting guideline and acronym(if applicable)</b>                                                                                                 | <b>Citation*</b>                                                                                                                                                                                                                                                                                                                                                 |
|------------------------|-----------------------------------------------------------------------|-------------------------------------------------------------------------------------------------------------------------------------------------------|------------------------------------------------------------------------------------------------------------------------------------------------------------------------------------------------------------------------------------------------------------------------------------------------------------------------------------------------------------------|
| Undefined              | Genetic risk prediction                                               | Reporting of Genetic Risk Prediction Studies: The GRIPS Statement                                                                                     | Janssens, A. C., Ioannidis, J. P., van Duijn, C. M., Little, J., and Khoury, M. J.. Strengthening the reporting of Genetic Risk Prediction Studies: the GRIPS Statement. PLoS Med. 2011 8(3): e1000420.                                                                                                                                                          |
| Undefined              | Genotype prevalence and gene-disease associations                     | Proposed checklist for reporting and appraising studies of genotype prevalence and gene-disease associations                                          | Little, J., Bradley, L., Bray, M. S., Clyne, M., Dorman, J., Ellsworth, D. L., et al. Reporting, appraising, and integrating data on genotype prevalence and gene-disease associations. Am J Epidemiol. 2002; 156: 300e10.                                                                                                                                       |
| Undefined              | Lower extremity ischemia.                                             | Suggested standards for reports dealing with lower extremity ischemia                                                                                 | Rutherford, R., Flanigan, D., Gupta, S., Johnston, K., Karmody, A., Whittemore, A. D., et al. Suggested standards for reports dealing with lower extremity ischemia. Prepared by the Ad Hoc Committee on Reporting Standards, Society for Vascular Surgery/North American Chapter, International Society for Cardiovascular Surgery. J VascSurg. 1986; 4: 80e94. |
| Undefined              | Emergency department patients with potential acute coronary syndromes | Standardized Reporting Guidelines for Studies Evaluating Risk Stratification of Emergency Department Patients with Potential Acute Coronary Syndromes | Hollander, J. E., Blomkalns, A. L., Brogan, G. X., Diercks, D. B., Field, J. M., Garvey, J. L., et al. Standardized reporting guidelines for studies evaluating risk stratification of emergency department patients with potential acute coronary syndromes. Ann Emerg Med. 2004; 44: 589e98.                                                                   |
| Undefined              | Heart valve surgery                                                   | Recommendations for reporting morbid events after heart valve surgery                                                                                 | Horstkotte, D., Lengyel, M., Mistiaen, W. P., Piper, C., Voller, H., et al., Working Group on Infection, Thrombosis, Embolism and Bleeding; Society of Heart Valve Disease. Recommendations for reporting morbid events after heart valve surgery. J Heart Valve Dis. 2005; 14: 1e7.                                                                             |

| Guideline focus | Content area                                    | Reporting guideline and acronym(if applicable)                                                                                      | Citation*                                                                                                                                                                                                                                                                                                                                                                                                                                                                                                            |
|-----------------|-------------------------------------------------|-------------------------------------------------------------------------------------------------------------------------------------|----------------------------------------------------------------------------------------------------------------------------------------------------------------------------------------------------------------------------------------------------------------------------------------------------------------------------------------------------------------------------------------------------------------------------------------------------------------------------------------------------------------------|
| Undefined       | Cardiopulmonary bypass surgery                  | Minimal Criteria for Reporting the Systemic Inflammatory Response to Cardiopulmonary Bypass                                         | Landis, R. C., Arrowsmith, J. E., Baker, R. A., de Somer, F., Dobkowski, W. B., Fisher, G., et al. Consensus statement: defining minimal criteria for reporting the systemic inflammatory response to cardiopulmonary bypass. <i>Heart Surg Forum</i> . 2008; 11: E316e22.<br><br><i>Also published in:</i><br><i>Heart Surgery Forum</i> . 2008; 11 (5): 286-292.                                                                                                                                                   |
| Undefined       | Out-of-hospital cardiac arrest                  | Recommended guidelines for uniform reporting of data from out-of- hospital cardiac arrest: the Utstein Style                        | Cummins, R. O., Chamberlain, D. A., Abramson, N. S., Allen, M., Baskett, P. J, Becker, L., et al. Recommended guidelines for uniform reporting of data from out-of-hospital cardiac arrest: the Utstein style. A statement for health professionals from a task force of the American Heart Association, the European Resuscitation Council, the Heart and Stroke Foundation of Canada, and the Australian Resuscitation Council. <i>Circulation</i> . 1991; 84: 960e75.                                             |
| Undefined       | Adult in-hospital resuscitation                 | Recommended Guidelines for Reviewing, Reporting and Conducting Research on In-hospital Resuscitation: The In-hospital Utstein Style | Cummins, R., Chamberlain, D., Hazinski, M. F., Nadkarni, V., and Kloeck, W.. Recommended guidelines for reviewing, reporting, and conducting research on in-hospital resuscitation: the in-hospital “Utstein style”. A statement for health care professionals from the American Heart Association, the European Resuscitation Council, the Heart and Stroke Foundation of Canada, the Australian Resuscitation Council, and the Resuscitation Councils of Southern Africa. <i>Acad Emerg Med</i> . 1997; 4: 603e27. |
| Undefined       | Pediatric resuscitation (advanced life support) | Recommended Guidelines for Uniform Reporting of Pediatric Advanced Life Support: The Pediatric Utstein Style                        | Zaritsky, A., Nadkarni, V., Hazinski, M. F., Foltin, G., Quan, L., Wright, J., et al. Recommended guidelines for uniform reporting of pediatric advanced life support: the pediatric Utstein style. <i>Ann Emerg Med</i> . 1995; 26: 487e503.                                                                                                                                                                                                                                                                        |

| <b>Guideline focus</b> | <b>Content area</b>                 | <b>Reporting guideline and acronym(if applicable)</b>                                                                  | <b>Citation*</b>                                                                                                                                                                                                                                                                     |
|------------------------|-------------------------------------|------------------------------------------------------------------------------------------------------------------------|--------------------------------------------------------------------------------------------------------------------------------------------------------------------------------------------------------------------------------------------------------------------------------------|
| Undefined              | Post-resuscitation in hospital care | Recommended guidelines for reviewing, reporting, and conducting research on post-resuscitation care: The Utstein Style | Langhelle, A., Nolan, J., Herlitz, J., Castren, M., Wenzel, V., Soreide, E., et al. Recommended guidelines for reviewing, reporting, and conducting research on post-resuscitation care: the Utstein style. <i>Resuscitation</i> . 2005; 66: 271e83.                                 |
| Undefined              | Bariatric surgery                   | Standards for reporting results                                                                                        | Mason, E. E., Amaral, J., Cowan, G. S. Jr., Deitel, M., Gleysteen, J. J., and Oria, H. E.. Standards for reporting results. <i>Obes Surg</i> . 1994; 4: 56e65.                                                                                                                       |
| Undefined              | Bariatric surgery                   | Guidelines for reporting results in bariatric surgery                                                                  | Standards Committee, American Society for Bariatric Surgery. Guidelines for reporting results in bariatric surgery. Standards Committee, American Society for Bariatric Surgery. <i>Obes Surg</i> . 1997; 7: 521e2.                                                                  |
| Validation studies     | Health administrative data          | Validation studies of health administrative data                                                                       | Benchimol, E. I., Manuel, D. G., To, T., Griffiths, A. M., Rabeneck, L., and Guttman, A.. Development and use of reporting guidelines for assessing the quality of validation studies of health administrative data. <i>Journal of Clinical Epidemiology</i> . 2011; 64(8): 821-829. |

\*Additional citations provided, where existing, for those searched using Scopus for evaluations.

## Appendix 6. Support for validity assessment judgments.

Abbreviations: high=high validity; low=low validity; n/a=not applicable; unclear=unclear validity.

### BMJ ECONOMICS GUIDELINE EVALUATIONS

Herman, 2005

| Item                                                                                                           | Judgement | Support for judgement                                                                                                                                                                                                                                                                                                                               |
|----------------------------------------------------------------------------------------------------------------|-----------|-----------------------------------------------------------------------------------------------------------------------------------------------------------------------------------------------------------------------------------------------------------------------------------------------------------------------------------------------------|
| Two or more assessors for completeness of reporting                                                            | Unclear   | Authors do not state how many people assessed completeness of reporting.                                                                                                                                                                                                                                                                            |
| Number of items assessed as reported in methods section                                                        | High      | Quote (methods section): "...gather from each study the data needed to assess quality according to a 35-item checklist developed by the BMJ Economic Evaluation Working Party".<br>Quote (results section): "Table 4 shows the results of the application of the BMJ 35-item quality checklist..."<br>Comment: Table 4 shows data for all 35 items. |
| Comprehensive search strategy                                                                                  | Low       | Quote: "We searched the following electronic databases from January 1999 to October 2004: Medline, AMED, Alt-Health-Watch, and the Complementary and Alternative Medicine Citation Index..."<br>Comment: no supplementary searches conducted. Articles limited to the English language.                                                             |
| Balance of studies per journal in comparison arms (end vs. non)                                                | High      | Endorser arm: 2 articles from 1 journal<br>Non-endorser arm: 11 articles from 10 journals, mostly 1 study per journal<br>Comment: Appears to be balanced in each arm.                                                                                                                                                                               |
| Balance of studies per journal in comparison arms (after vs. before)                                           | n/a       | n/a                                                                                                                                                                                                                                                                                                                                                 |
| Sampling took place in the period following the publication of the reporting guideline (after vs. before only) | n/a       | n/a                                                                                                                                                                                                                                                                                                                                                 |

Jefferson, 1998

| Item                                                    | Judgement | Support for judgement                                                                                                                                                                                       |
|---------------------------------------------------------|-----------|-------------------------------------------------------------------------------------------------------------------------------------------------------------------------------------------------------------|
| Two or more assessors for completeness of reporting     | Unclear   | Authors do not state how many people assessed completeness of reporting.                                                                                                                                    |
| Number of items assessed as reported in methods section | Unclear   | Quote (methods): "This checklist contains 35 items important for reporting the results of economic evaluations..."<br>Comment: no verification made in the results section of the number of items assessed. |
| Comprehensive search strategy                           | High      | Two journals were specifically chosen during a certain time period.<br>Comment: Given their intended focus, all manuscripts would have been obtained.                                                       |
| Balance of studies per journal in                       | High      | Only 1 journal per arm included in the assessment.                                                                                                                                                          |

| Item                                                                                                           | Judgement | Support for judgement                                                                                                                                                                                                           |
|----------------------------------------------------------------------------------------------------------------|-----------|---------------------------------------------------------------------------------------------------------------------------------------------------------------------------------------------------------------------------------|
| comparison arms (end vs. non)                                                                                  |           |                                                                                                                                                                                                                                 |
| Balance of studies per journal in comparison arms (after vs. before)                                           | High      | Only one journal included in the comparison.                                                                                                                                                                                    |
| Sampling took place in the period following the publication of the reporting guideline (after vs. before only) | Low       | Quote: "...during the periods July 1 to September 30, 1994, to BMJ and October 1 to December 31, 1995, to BMJ and The Lancet were included in a "before" phase of the study".<br>Comment: reporting guideline published in 1996 |

### CONSORT EXTENSION FOR ABSTRACTS, 2008

Ghimire, 2014

| Item                                                                                                           | Judgement | Support for judgement                                                                                                                                                                                                               |
|----------------------------------------------------------------------------------------------------------------|-----------|-------------------------------------------------------------------------------------------------------------------------------------------------------------------------------------------------------------------------------------|
| Two or more assessors for completeness of reporting                                                            | High      | Quote: "Two clinical pharmacists...independently extract the data using the CONSORT for Abstract guidelines."                                                                                                                       |
| Number of items assessed as reported in methods section                                                        | Unclear   | Number of items not specified in Methods section. All items reported in Results section.                                                                                                                                            |
| Comprehensive search strategy                                                                                  | Low       | Quote: "We conducted a MEDLINE/PubMed search to identify all RCTs published in the field of oncology before and after...2008."<br>Comment: Only one database searched and no supplementary searches conducted.                      |
| Balance of studies per journal in comparison arms (end vs. non)                                                | Low       | End: 74 articles in 2 journals<br>Non-end: 234 articles in 4 journals<br>Comment: In non-endorser arm, 66% of studies were from one journal. In endorser arm, 58% of studies were from one journal.                                 |
| Balance of studies per journal in comparison arms (after vs. before)                                           | Low       | After: 74 articles in 2 journals. 66% from one journal.<br>Before: 16 articles in 2 journals. 69% from one journal.                                                                                                                 |
| Sampling took place in the period following the publication of the reporting guideline (after vs. before only) | Low       | Quote: "The initial search differentiated between pre-CONSORT (2005-2007) and post-CONSORT (2010-2012) abstract periods."<br>Comment: all articles in the 'before' arm were published before the reporting guideline was published. |

### CONSORT EXTENSION FOR HARMS, 2004

Haidich, 2011

| Item                                                    | Judgement | Support for judgement                                                                                                                                                                                                                                                |
|---------------------------------------------------------|-----------|----------------------------------------------------------------------------------------------------------------------------------------------------------------------------------------------------------------------------------------------------------------------|
| Two or more assessors for completeness of reporting     | High      | Quote: "Then two of us (A.B.H. and C.B.) independently extracted data from the main text on the characteristics of reports and examined whether reporting of harms was described according to the 10 new recommendations in the Extension of the CONSORT statement." |
| Number of items assessed as reported in methods section | High      | Quote (methods): "A summary of the 10 new recommendations is presented in Table 1."<br>Comment: Table 2 shows data for all 10                                                                                                                                        |

| Item                                                                                                           | Judgement | Support for judgement                                                                                                                                                                                                                       |
|----------------------------------------------------------------------------------------------------------------|-----------|---------------------------------------------------------------------------------------------------------------------------------------------------------------------------------------------------------------------------------------------|
|                                                                                                                |           | recommendations.                                                                                                                                                                                                                            |
| Comprehensive search strategy                                                                                  | High      | Specific journals from a specific year were chosen.<br>Comment: Given their intended focus, all manuscripts would have been obtained.                                                                                                       |
| Balance of studies per journal in comparison arms (end vs. non)                                                | Low       | Endorser arm: 2 journals with 6 and 19 studies, respectively<br>Non-endorser arm: 3 journals with 10, 16, and 51 studies, respectively<br>Comment: a substantial proportion of studies in each arm are clustered with a particular journal. |
| Balance of studies per journal in comparison arms (after vs. before)                                           | n/a       | n/a                                                                                                                                                                                                                                         |
| Sampling took place in the period following the publication of the reporting guideline (after vs. before only) | n/a       | n/a                                                                                                                                                                                                                                         |

Turner, 2011

| Item                                                                                                           | Judgement | Support for judgement                                                                                                                                                                                                                                                                                                                                        |
|----------------------------------------------------------------------------------------------------------------|-----------|--------------------------------------------------------------------------------------------------------------------------------------------------------------------------------------------------------------------------------------------------------------------------------------------------------------------------------------------------------------|
| Two or more assessors for completeness of reporting                                                            | Low       | Quote: "Data extraction was completed independently and verified by two authors by taking a 10% random sample of trials."                                                                                                                                                                                                                                    |
| Number of items assessed as reported in methods section                                                        | High      | Quote (methods): "We applied the CONSORT for harms extension collecting data on each of the first seven recommendations..."<br>Quote (results): "In general, we found a low compliance with seven CONSORT for harms recommendations."<br>Comment: Table 4 shows data for all 7 items.                                                                        |
| Comprehensive search strategy                                                                                  | Low       | Quotes: "We searched the Cochrane Complementary Medicine Field (CAM Field) Specialized Register of trials." and "...were excluded along with reports...for which full text articles were not locally available."<br><br>Comment: Handsearching of journals is conducted for this register but authors limited their inclusion to locally available articles. |
| Balance of studies per journal in comparison arms (end vs. non)                                                | Low       | Endorser arm: 5 journals with 1 study each<br>Non-endorser arm: 104 journals with 189 articles (2 journals contributed 17 and 22 articles, respectively, and remaining journals contributed 1 study each).<br>Comment: 20% of studies in the non-endorser arm are clustered in two journals.                                                                 |
| Balance of studies per journal in comparison arms (after vs. before)                                           | n/a       | n/a                                                                                                                                                                                                                                                                                                                                                          |
| Sampling took place in the period following the publication of the reporting guideline (after vs. before only) | n/a       | n/a                                                                                                                                                                                                                                                                                                                                                          |

Peron, 2013

| Item                                                                                                           | Judgement | Support for judgement                                                                                                                                                        |
|----------------------------------------------------------------------------------------------------------------|-----------|------------------------------------------------------------------------------------------------------------------------------------------------------------------------------|
| Two or more assessors for completeness of reporting                                                            | Unclear   | Quote: "A standardized data extraction form was used by two authors...to capture remaining data in this review."<br>Comment: It is unclear whether dual extraction was used. |
| Number of items assessed as reported in methods section                                                        | High      | Same number of total items provided in Methods and Results sections.                                                                                                         |
| Comprehensive search strategy                                                                                  | Low       | Comment: Searched only one database (Medline/PubMed), and limited the search to 10 journals. No supplemental searches were conducted.                                        |
| Balance of studies per journal in comparison arms (end vs. non)                                                | Low       | End: 43 articles from 2 journals. 62% from one journal.<br>Non-End: 282 articles from 8 journals. 53% of articles were clustered in one journal.                             |
| Balance of studies per journal in comparison arms (after vs. before)                                           | n/a       | n/a                                                                                                                                                                          |
| Sampling took place in the period following the publication of the reporting guideline (after vs. before only) | n/a       | n/a                                                                                                                                                                          |

Cornelius, 2013

| Item                                                                                                           | Judgement | Support for judgement                                                                                                                                                                                                                                                                                                         |
|----------------------------------------------------------------------------------------------------------------|-----------|-------------------------------------------------------------------------------------------------------------------------------------------------------------------------------------------------------------------------------------------------------------------------------------------------------------------------------|
| Two or more assessors for completeness of reporting                                                            | High      | "All data were extracted independently by 2 reviewers... and disagreements were resolved by discussion between reviewers."                                                                                                                                                                                                    |
| Number of items assessed as reported in methods section                                                        | High      | Items indicated in Methods and Results sections are the same.                                                                                                                                                                                                                                                                 |
| Comprehensive search strategy                                                                                  | High      | Quote: Embase, Health Services Research Projects in Progress (HSRProj), International Pharmaceutical Abstracts, ISI Proceedings, MEDLINE, CINAHL, LILACS, National Research Register (NRR) Archive, National Technical Information Service (TOXNET). Reference Lists of relevant reviews and original articles were scanned." |
| Balance of studies per journal in comparison arms (end vs. non)                                                | High      | End: 1 article from 1 journal<br>Non-End: 6 articles from 5 journals<br>Comment: appears to be balanced in each arm                                                                                                                                                                                                           |
| Balance of studies per journal in comparison arms (after vs. before)                                           | n/a       | n/a                                                                                                                                                                                                                                                                                                                           |
| Sampling took place in the period following the publication of the reporting guideline (after vs. before only) | n/a       | n/a                                                                                                                                                                                                                                                                                                                           |

Lee, 2008

| Item                                                | Judgement | Support for judgement                                                                                                                      |
|-----------------------------------------------------|-----------|--------------------------------------------------------------------------------------------------------------------------------------------|
| Two or more assessors for completeness of reporting | High      | Quote: "Each paper was independently reviewed using the standard data abstraction form by two study investigators (PEL and HF)...they also |



| Item                                                                                                           | Judgement | Support for judgement                                                                                                                                                                                                                                                                                                                                                                                                       |
|----------------------------------------------------------------------------------------------------------------|-----------|-----------------------------------------------------------------------------------------------------------------------------------------------------------------------------------------------------------------------------------------------------------------------------------------------------------------------------------------------------------------------------------------------------------------------------|
|                                                                                                                |           | indicated on the form if the paper fulfilled the CONSORT harm reporting suggestions...”                                                                                                                                                                                                                                                                                                                                     |
| Number of items assessed as reported in methods section                                                        | High      | Quote (methods): “An abstraction form was developed to collect data from each paper on the extent to which the paper provided the information recommended by CONSORT. This abstraction form identified 10 specific topics on harm...(Appendix).”<br>Quote (results): “Table 2 provides a summary of the data on the location of information on harm and harm topics...”.<br>Comment: items in Appendix and Table 2 coincide |
| Comprehensive search strategy                                                                                  | High      | Quote: “Electronic searches of MEDLINE (1966 to May Week 4, 2005), EMBASE (1980-2005 Week 6), and the Cochrane Databases (inception to fourth quarter 2004) were performed...reference lists from the identified articles were manually searched and cross-referenced. Clinical experts were contacted to identify additional trials.                                                                                       |
| Balance of studies per journal in comparison arms (end vs. non)                                                | High      | Endorser arm: 1 study from 1 journal<br>Non-endorser arm: 1 study from 1 journal                                                                                                                                                                                                                                                                                                                                            |
| Balance of studies per journal in comparison arms (after vs. before)                                           | High      | Only one journal included in the comparison.                                                                                                                                                                                                                                                                                                                                                                                |
| Sampling took place in the period following the publication of the reporting guideline (after vs. before only) | Low       | Studies in the ‘before’ arm were published in 1999-2000; the reporting guideline was published in 2004.                                                                                                                                                                                                                                                                                                                     |

## CONSORT FOR HERBAL INTERVENTIONS, 2006

Ernst, 2011

| Item                                                    | Judgement | Support for judgement                                                                                                                                                                                                                                                                                                                                                                                                                                                                |
|---------------------------------------------------------|-----------|--------------------------------------------------------------------------------------------------------------------------------------------------------------------------------------------------------------------------------------------------------------------------------------------------------------------------------------------------------------------------------------------------------------------------------------------------------------------------------------|
| Two or more assessors for completeness of reporting     | Unclear   | Quote: “Data were extracted independently by two reviewers according to pre-defined criteria, including study design, intervention and control (placebo or active), participant characteristics, the main study findings and conclusions...In addition we evaluated all RCTs according to the criteria used in the CONSORT guidelines for herbal medicines”.<br>Comment: it is unclear whether they used two reviewers to also evaluate trials according to the reporting guideline. |
| Number of items assessed as reported in methods section | High      | Quote (methods): “The guideline incorporates a total of 15 items describing the herbal medicinal intervention...”<br>Quote (results): “None of the RCTs partially or fully described all 15 items.”                                                                                                                                                                                                                                                                                  |
| Comprehensive search strategy                           | Low       | Quote: “...to identify all the studies sponsored by NCCAM in Medline (via Pubmed).”<br>Comment: A supplementary search, especially by contacting NCCAM should have been done to ensure catchment.                                                                                                                                                                                                                                                                                    |
| Balance of studies per journal in                       | High      | Endorser arm: 1 study from 1 journal                                                                                                                                                                                                                                                                                                                                                                                                                                                 |

| Item                                                                                                          | Judgement | Support for judgement                        |
|---------------------------------------------------------------------------------------------------------------|-----------|----------------------------------------------|
| comparison arms (end vs. non)                                                                                 |           | Non-endorser arm: 6 studies from 5 journals. |
| Balance of studies per journal in comparison arms (after vs. before)                                          | n/a       | n/a                                          |
| Sampling took place in the period following the publication of the reporting guideline (after vs before only) | n/a       | n/a                                          |

### PRISMA, 2009

Tunis, 2013

| Item                                                                                                           | Judgement | Support for judgement                                                                                                                                                                                                                                          |
|----------------------------------------------------------------------------------------------------------------|-----------|----------------------------------------------------------------------------------------------------------------------------------------------------------------------------------------------------------------------------------------------------------------|
| Two or more assessors for completeness of reporting                                                            | High      | Quote: “Data extraction was performed independently on included articles by two investigators. ...and assessed by using PRISMA and AMSTAR checklists.”                                                                                                         |
| Number of items assessed as reported in methods section                                                        | High      | Authors provide PRISMA checklist as an appendix, and all items were collected on as shown in Figure 4.                                                                                                                                                         |
| Comprehensive search strategy                                                                                  | Low       | Quote: “A searched was performed in MEDLINE...the search was limited to radiology-specific journals with an impact factor greater than 2.75...”<br>Comment: One database searched and limited to radiology-specific journals above an impact factor threshold. |
| Balance of studies per journal in comparison arms (end vs. non)                                                | Low       | Endorser arm: 13 studies from 1 journal<br>Non-endorser arm: 48 articles from 8 journals: 3 journals with 10-13 articles each and remaining journals with 1-5 articles each.<br>Comment: majority of studies in non-endorser arm clustered in 3 journals.      |
| Balance of studies per journal in comparison arms (after vs. before)                                           | n/a       | n/a                                                                                                                                                                                                                                                            |
| Sampling took place in the period following the publication of the reporting guideline (after vs. before only) | n/a       | n/a                                                                                                                                                                                                                                                            |

Panic, 2013

| Item                                                    | Judgement | Support for judgement                                                                                                                                                                                                                |
|---------------------------------------------------------|-----------|--------------------------------------------------------------------------------------------------------------------------------------------------------------------------------------------------------------------------------------|
| Two or more assessors for completeness of reporting     | High      | Quote: “Scoring the papers with PRISMA and AMSTAR checklists was performed by two researchers independently”                                                                                                                         |
| Number of items assessed as reported in methods section | High      | Comment: authors provide the complete PRISMA checklist as web-only materials and cited in their methods section. They provide data for all items in Table 1.                                                                         |
| Comprehensive search strategy                           | Low       | Authors searched one database (MEDLINE) for journals listed in the GH category from Thomson Reuters Current Contents in Clinical Medicine. A subset of papers were randomly selected.<br>Comment: only one database searched, random |

| Item                                                                                                           | Judgement | Support for judgement                                                                                                                                                                                                                                                                                                                                        |
|----------------------------------------------------------------------------------------------------------------|-----------|--------------------------------------------------------------------------------------------------------------------------------------------------------------------------------------------------------------------------------------------------------------------------------------------------------------------------------------------------------------|
|                                                                                                                |           | sample subset of papers chosen, and no supplementary searches conducted. Unclear how many reviews were missed from other journals.                                                                                                                                                                                                                           |
| Balance of studies per journal in comparison arms (end vs. non)                                                | Unclear   | Endorser arm: 3 journals with 6-9 articles, 3 journals with 1-4 articles each.<br>Non-endorser arm: 4 journals with 4-6 articles, 5 journals with 1-5 articles each.<br><br>Comment: Unclear how this would impact the results.                                                                                                                              |
| Balance of studies per journal in comparison arms (after vs. before)                                           | Low       | After endorsement: 3 journals with 6-9 articles, 2 journals with 1-4 articles each.<br>Before endorsement: 2 journals with 9-10 articles each, 3 journals with 1-2 journals each.<br>Comment: articles not evenly distributed in 'before' arm. Unclear impact in 'after' arm.                                                                                |
| Sampling took place in the period following the publication of the reporting guideline (after vs. before only) | Unclear   | After endorsement: all articles published in 2012<br>Before arm. All articles published the year before journal endorsement, which varied across journal.<br>Year range: 2008-2011.<br>Comment: based on information provided by authors, it is unclear which and how much 'before' data were published in 2008, which would be before PRISMA was published. |

Fleming, 2013

| Item                                                                 | Judgement | Support for judgement                                                                                                                                                                                                                                                                                                                                                                                                                                                                              |
|----------------------------------------------------------------------|-----------|----------------------------------------------------------------------------------------------------------------------------------------------------------------------------------------------------------------------------------------------------------------------------------------------------------------------------------------------------------------------------------------------------------------------------------------------------------------------------------------------------|
| Two or more assessors for completeness of reporting                  | High      | Quote: "discrepancies between the authors in the grading of individual criteria were resolved by joint discussion"<br>Comment: reasonable to infer that at least two people independently assessed completeness of reporting.                                                                                                                                                                                                                                                                      |
| Number of items assessed as reported in methods section              | High      | Quote: "...the PRISMA guidelines. These guidelines incorporate 27 items..."<br>Comment: Table 1 provides data for all 27 items.                                                                                                                                                                                                                                                                                                                                                                    |
| Comprehensive search strategy                                        | Low       | Quote: "A comprehensive literature search was undertaken to identify systematic reviews by searching five major orthodontic journals...and The Cochrane Library...the search process is outlined elsewhere."<br>Comment: Located other cited article, and neither this nor the other article provide how the five journals and Cochrane were searched (e.g., handsearching or bibliographic database search), years and databases searched, nor were one or more supplementary searches conducted. |
| Balance of studies per journal in comparison arms (end vs. non)      | Low       | In endorsing arm, 1 of 2 journals contributed more articles (14 vs. 6 articles.) Only one journal in non-endorsing arm.                                                                                                                                                                                                                                                                                                                                                                            |
| Balance of studies per journal in comparison arms (after vs. before) | High      | Only one journal in each arm.                                                                                                                                                                                                                                                                                                                                                                                                                                                                      |

| Item                                                                                                           | Judgement | Support for judgement                              |
|----------------------------------------------------------------------------------------------------------------|-----------|----------------------------------------------------|
| Sampling took place in the period following the publication of the reporting guideline (after vs. before only) | Low       | All studies published before PRISMA was published. |

### QUOROM, 1999

Biondi-Zoccai, 2006

| Item                                                                                                           | Judgement | Support for judgement                                                                                                                                                                                                                                               |
|----------------------------------------------------------------------------------------------------------------|-----------|---------------------------------------------------------------------------------------------------------------------------------------------------------------------------------------------------------------------------------------------------------------------|
| Two or more assessors for completeness of reporting                                                            | High      | Quote: "As a measure of study quality we appraised the compliance of each systematic review with the QUOROM checklist...two unblinded reviewers (GGLB-Z, PA) independently appraised the studies."                                                                  |
| Number of items assessed as reported in methods section                                                        | High      | Quote (methods): "We considered that the study had complied with any of the 18 specific items..."<br>Comment: Table 5 of the result section provides data for 18 items.                                                                                             |
| Comprehensive search strategy                                                                                  | Low       | Quote: "We searched for systematic reviews in PubMed according to a defined strategy, and in the Cochrane database of systematic reviews and the database of abstracts of reviews of effects (updated March 2005)."<br>Comment: no supplemental searches conducted. |
| Balance of studies per journal in comparison arms (end vs. non)                                                | High      | Endorser arm: 1 study from 1 journal<br>Non-endorser arm: 6 studies from 5 journals                                                                                                                                                                                 |
| Balance of studies per journal in comparison arms (after vs. before)                                           | n/a       | n/a                                                                                                                                                                                                                                                                 |
| Sampling took place in the period following the publication of the reporting guideline (after vs. before only) | n/a       | n/a                                                                                                                                                                                                                                                                 |

Hind, 2007

| Item                                                                 | Judgement | Support for judgement                                                                                                                                                       |
|----------------------------------------------------------------------|-----------|-----------------------------------------------------------------------------------------------------------------------------------------------------------------------------|
| Two or more assessors for completeness of reporting                  | Low       | Quote: "One researcher (DH) examined the main body and appendices of all reports, recording...whether a QUOROM study selection diagram was presented..."                    |
| Number of items assessed as reported in methods section              | High      | Quote (methods): "QUOROM study selection diagram"<br>Quote (results): "Only 20 studies...had a diagram..."                                                                  |
| Comprehensive search strategy                                        | Low       | Quote: "In May 2006, we searched Medline for the HTA programme's monographs..."<br>Comment: Authors should have contacted the HTA programme to ensure a complete catchment. |
| Balance of studies per journal in comparison arms (end vs. non)      | n/a       |                                                                                                                                                                             |
| Balance of studies per journal in comparison arms (after vs. before) | High      | Only one journal assessed.                                                                                                                                                  |
| Sampling took place in the                                           | High      | Comparison years were 2003 and 2005; the reporting                                                                                                                          |

| Item                                                                                | Judgement | Support for judgement            |
|-------------------------------------------------------------------------------------|-----------|----------------------------------|
| period following the publication of the reporting guideline (after vs. before only) |           | guideline was published in 1999. |

Poolman, 2007

| Item                                                                                                           | Judgement | Support for judgement                                                                                                                                                                                                                                                                                          |
|----------------------------------------------------------------------------------------------------------------|-----------|----------------------------------------------------------------------------------------------------------------------------------------------------------------------------------------------------------------------------------------------------------------------------------------------------------------|
| Two or more assessors for completeness of reporting                                                            | High      | Quote: “All included manuscripts were independently assessed on methodological reporting by three assessors”                                                                                                                                                                                                   |
| Number of items assessed as reported in methods section                                                        | Unclear   | No information provided in the methods section about the intended number of items to assess.                                                                                                                                                                                                                   |
| Comprehensive search strategy                                                                                  | Low       | Quote: “We searched MEDLINE with OVID and PubMed (basic search, related articles, and clinical queries search), EMBASE, and the Cochrane Database of Systematic Reviews (CDSR)...we limited our search to the English language”<br>Comment: no supplemental searches done and limited to the English language. |
| Balance of studies per journal in comparison arms (end vs. non)                                                | High      | Endorser arm: 1 study in 1 journal<br>Non-endorser arm: 6 studies published in 5 journals                                                                                                                                                                                                                      |
| Balance of studies per journal in comparison arms (after vs. before)                                           | n/a       | n/a                                                                                                                                                                                                                                                                                                            |
| Sampling took place in the period following the publication of the reporting guideline (after vs. before only) | n/a       | n/a                                                                                                                                                                                                                                                                                                            |

**STARD, 2003**

Freeman, 2009

| Item                                                    | Judgement | Support for judgement                                                                                                                                                                                                                                                                                                                                                                                                                                                                                                                                                                                                                              |
|---------------------------------------------------------|-----------|----------------------------------------------------------------------------------------------------------------------------------------------------------------------------------------------------------------------------------------------------------------------------------------------------------------------------------------------------------------------------------------------------------------------------------------------------------------------------------------------------------------------------------------------------------------------------------------------------------------------------------------------------|
| Two or more assessors for completeness of reporting     | Unclear   | Comment: Not reported                                                                                                                                                                                                                                                                                                                                                                                                                                                                                                                                                                                                                              |
| Number of items assessed as reported in methods section | High      | Quote: “Papers were then scored against the STARD checklist of 25 items, resulting in a score out of 25 for each paper which corresponded to the paper’s quality as a study reporting diagnostic accuracy.”                                                                                                                                                                                                                                                                                                                                                                                                                                        |
| Comprehensive search strategy                           | High      | Quote: “Published articles were identified by systematic searches of electronic databases from 1966 until January 2007; these included PubMed, Ovid Medline, Ovid Embase, the Cochrane Library, the National Library for Health (UK), Online Computer Library Center (OCLC) and the Conference Papers Index. Text words and MeSH headings used separately and in combination included: prenatal diagnosis, Rh, fetal cells, fetal DNA, maternal blood, serum, plasma, Rh alloimmunis(z)ation. Bibliographies of all papers identified were examined. Searches for related articles by topic and author were carried out in PubMed where possible.” |

|                                                                                                                |      |                                                                                                                        |
|----------------------------------------------------------------------------------------------------------------|------|------------------------------------------------------------------------------------------------------------------------|
|                                                                                                                |      | Comment: more than one database and supplemental searches conducted.                                                   |
| Balance of studies per journal in comparison arms (end vs. non)                                                | High | End: 3 articles from 2 journals<br>Non-end: 9 articles from 7 journals<br>Comment: Appears to be balanced in each arm. |
| Balance of studies per journal in comparison arms (after vs. before)                                           | n/a  | n/a                                                                                                                    |
| Sampling took place in the period following the publication of the reporting guideline (after vs. before only) | n/a  | n/a                                                                                                                    |

Mahoney, 2007

| Item                                                                                                           | Judgement | Support for judgement                                                                                                                                                                                                                                                                                                                                                                          |
|----------------------------------------------------------------------------------------------------------------|-----------|------------------------------------------------------------------------------------------------------------------------------------------------------------------------------------------------------------------------------------------------------------------------------------------------------------------------------------------------------------------------------------------------|
| Two or more assessors for completeness of reporting                                                            | High      | Quote: "Differences in interpretation and discrepancies in ratings between the 2 reviewers were rare and were settled via consensus after additional review of the report for supporting evidence. Differences in interpretation and discrepancies in ratings between the 2 reviewers were rare and were settled via consensus after additional review of the report for supporting evidence." |
| Number of items assessed as reported in methods section                                                        | High      | Quote: "To evaluate the quality of reporting, we chose the 25-item STARD checklist (13,14). However, because whole blood glucose monitors are not diagnostic devices, 5 STARD criteria (STARD checklist items 1, 9,12, 21, and 23) were deemed not applicable and were not scored."                                                                                                            |
| Comprehensive search strategy                                                                                  | Low       | Quote: "We searched the PubMed database for articles from August 2002 to November 2006 using combinations of the words: blood glucose, performance, evaluation, accurate, accuracy, point-of-care, meter, glucometer, and Monitor."<br>Comment: only one source searched, no supplemental searches conducted.                                                                                  |
| Balance of studies per journal in comparison arms (end vs. non)                                                | High      | End: 6 articles from 5 journals<br>Non-end: 20 articles from 13 journals<br>Comment: Appears to be balanced in each arm.                                                                                                                                                                                                                                                                       |
| Balance of studies per journal in comparison arms (after vs. before)                                           | n/a       | n/a                                                                                                                                                                                                                                                                                                                                                                                            |
| Sampling took place in the period following the publication of the reporting guideline (after vs. before only) | n/a       | n/a                                                                                                                                                                                                                                                                                                                                                                                            |

Selman, 2011

| Item                                                | Judgement | Support for judgement                                                                                                                                               |
|-----------------------------------------------------|-----------|---------------------------------------------------------------------------------------------------------------------------------------------------------------------|
| Two or more assessors for completeness of reporting | High      | Quote: "All studies were assessed by TJS and RKM in duplicate, where there was disagreement consensus was achieved following assessment by a third reviewer (KSK)." |

|                                                                                                                |      |                                                                                                                                                                                                                                                                                                                                                                                                                                                                                                                            |
|----------------------------------------------------------------------------------------------------------------|------|----------------------------------------------------------------------------------------------------------------------------------------------------------------------------------------------------------------------------------------------------------------------------------------------------------------------------------------------------------------------------------------------------------------------------------------------------------------------------------------------------------------------------|
| Number of items assessed as reported in methods section                                                        | Low  | Quote: “The STARD checklist was applied to each of the studies included in all the reviews with the reporting item being determined as either present, absent, unclear or not applicable (additional file 1).”                                                                                                                                                                                                                                                                                                             |
| Comprehensive search strategy                                                                                  | Low  | Quote: “We developed a protocol to assess the impact of STARD on studies included in ten systematic reviews performed over the period 2004-2007. The studies covered the time period 1977-2007. We included reviews of minimal and non invasive tests to determine the lymph node status in gynaecological cancers [13-15] and reviews of Down’s serum screening markers and uterine artery Doppler to predict small for gestational age in obstetrics [16,17]”<br>Comment: authors do not state their sources of studies. |
| Balance of studies per journal in comparison arms (end vs. non)                                                | Low  | End: 15 articles from 7 journals<br>Non-end: 35 articles from 21 journals<br>Comment: in each arm about one-third of studies were from one journal                                                                                                                                                                                                                                                                                                                                                                         |
| Balance of studies per journal in comparison arms (after vs. before)                                           | Low  | Before: 1 article from 1 journal<br>After: 3 studies from 1 journal<br>Comment: only one journal in assessment.                                                                                                                                                                                                                                                                                                                                                                                                            |
| Sampling took place in the period following the publication of the reporting guideline (after vs. before only) | High | Quote: “The studies covered the time period 1977-2007.”<br>Comment: STARD published in 2003.                                                                                                                                                                                                                                                                                                                                                                                                                               |

Smidt, 2006

| Item                                                                         | Judgement | Support for judgement                                                                                                                                                                                                                                                                                      |
|------------------------------------------------------------------------------|-----------|------------------------------------------------------------------------------------------------------------------------------------------------------------------------------------------------------------------------------------------------------------------------------------------------------------|
| Two or more assessors for completeness of reporting                          | High      | Quote: “Two reviewers independently evaluated the included articles.”                                                                                                                                                                                                                                      |
| Number of items assessed as reported in methods section                      | High      | Quote: “The 25 items of the STARD statement were used to assess the quality of reporting.”                                                                                                                                                                                                                 |
| Comprehensive search strategy                                                | Low       | Quote: “searched MEDLINE and used a validated strategy ([Sensitivity AND specificity.sh] OR [Specificit*.tw] OR [False negative.tw] OR [Accuracy.tw]) <sup>15</sup> to identify articles on diagnostic accuracy published in six general medical journals”<br>Comment: no supplemental searches conducted. |
| Balance of studies per journal in comparison arms (end vs. non)              | Low       | End: 95 articles from 7 journals<br>Non-end: 46 articles from 5 journals<br>Comment: imbalance in number of studies per journal in each arm.                                                                                                                                                               |
| Balance of studies per journal in comparison arms (after vs. before)         | Unclear   | Before: 78 articles from 7 journals (77% of studies from 3 journals)<br>After: 95 articles from 7 journals (76% of studies from 3 journals)<br>Comment: based on information provided, it is unclear whether the observed clustering of studies within the journal subset would affect estimates.          |
| Sampling took place in the period following the publication of the reporting | Low       | Quote: “The search was limited to studies focusing on human subjects and articles published in 2000 and 2004.”                                                                                                                                                                                             |

|                                   |  |                                  |
|-----------------------------------|--|----------------------------------|
| guideline (after vs. before only) |  | Comment: STARD published in 2003 |
|-----------------------------------|--|----------------------------------|

Coppus, 2006

| Item                                                                                                           | Judgement | Support for judgement                                                                                                                                                                                                                                                                                                                                                                    |
|----------------------------------------------------------------------------------------------------------------|-----------|------------------------------------------------------------------------------------------------------------------------------------------------------------------------------------------------------------------------------------------------------------------------------------------------------------------------------------------------------------------------------------------|
| Two or more assessors for completeness of reporting                                                            | Low       | Quote: “A single trained reviewer scored all articles, with a secondary reviewer (B. W. J. M.) checking a random sample of 20% to ensure accuracy in interpretation of the articles.”                                                                                                                                                                                                    |
| Number of items assessed as reported in methods section                                                        | High      | Quote: “For each item of the STARD statement, the total number of articles reporting all the elements needed for that item was summed. Equal weights were applied to each item. The total number of reported STARD items was also calculated for each article by summing the number of reported items (0–25 points possible).”                                                           |
| Comprehensive search strategy                                                                                  | Unclear   | Quote: “We performed a systematic search in all issues of <i>Fertility and Sterility</i> and <i>Human Reproduction</i> published in 1999 (pre-STARD) and in 2004 (post-STARD) for articles reporting on the diagnostic or prognostic accuracy of a test.”<br>Comment: authors did not state how they searched for articles (whether by handsearching or use of bibliographic databases). |
| Balance of studies per journal in comparison arms (end vs. non)                                                | High      | End: 8 articles from 1 journal<br>Non-End: 19 articles from 1 journal<br>Comment: only one journal in assessment.                                                                                                                                                                                                                                                                        |
| Balance of studies per journal in comparison arms (after vs. before)                                           | n/a       | n/a                                                                                                                                                                                                                                                                                                                                                                                      |
| Sampling took place in the period following the publication of the reporting guideline (after vs. before only) | n/a       | n/a                                                                                                                                                                                                                                                                                                                                                                                      |

Johnson, 2007

| Item                                                    | Judgement | Support for judgement                                                                                                                                                                                                                                                                                                                                                                                                                                                         |
|---------------------------------------------------------|-----------|-------------------------------------------------------------------------------------------------------------------------------------------------------------------------------------------------------------------------------------------------------------------------------------------------------------------------------------------------------------------------------------------------------------------------------------------------------------------------------|
| Two or more assessors for completeness of reporting     | High      | Quote: “Each paper was scored by 2 authors (ZKJ and MARS) independently”                                                                                                                                                                                                                                                                                                                                                                                                      |
| Number of items assessed as reported in methods section | High      | Quote: “The eligible articles then were assessed using the STARD checklist (Table 1), with each item being scored as either fully, partially, or not reported.”                                                                                                                                                                                                                                                                                                               |
| Comprehensive search strategy                           | Low       | Quote: “In June, 2006, a Medline and Medical Subject Headings search was conducted using the following terms: RNFL thickness, retinal nerve fiber layer thickness, OCT, optical coherence tomography, receiver operator characteristic, area under curve, diagnostic accuracy, glaucoma diagnosis, sensitivity, and specificity...all publications included in the reference list of the short-listed manuscripts also were examined...Abstracts identified were assessed for |



|                                                                                                                |      |                                                                                                                                                             |
|----------------------------------------------------------------------------------------------------------------|------|-------------------------------------------------------------------------------------------------------------------------------------------------------------|
|                                                                                                                |      | eligibility”<br>Comment: years of coverage not provided, only one database searched.                                                                        |
| Balance of studies per journal in comparison arms (end vs. non)                                                | High | End: 1 article from 1 journal<br>Non-end: 10 studies from 4 journals<br>Comment: in the non-endorser arm, half of the studies were clustered by one journal |
| Balance of studies per journal in comparison arms (after vs. before)                                           | n/a  | n/a                                                                                                                                                         |
| Sampling took place in the period following the publication of the reporting guideline (after vs. before only) | n/a  | n/a                                                                                                                                                         |

#### Krzych, 2009

| Item                                                                                                           | Judgement | Support for judgement                                                                                                                                                                                                                                                                                                                                                                                                                             |
|----------------------------------------------------------------------------------------------------------------|-----------|---------------------------------------------------------------------------------------------------------------------------------------------------------------------------------------------------------------------------------------------------------------------------------------------------------------------------------------------------------------------------------------------------------------------------------------------------|
| Two or more assessors for completeness of reporting                                                            | Unclear   | Quote: “...if a discrepancy between assessors had appeared during evaluation, the quality estimation was judged by compromise on the basis of published evidence”                                                                                                                                                                                                                                                                                 |
| Number of items assessed as reported in methods section                                                        | High      | Quote: “we assessed the quality of every article with the use of the 14-item QUADAS tool [14] widened by a subjectively prepared list of eight STARD criteria (those shown to be less reproducible in the assessment cited above) [13].”                                                                                                                                                                                                          |
| Comprehensive search strategy                                                                                  | Low       | Quote: “we searched the MEDLINE and EMBASE databases from January 2004 to April 2007 (last search: May 7, 2007) for all studies of the diagnostic accuracy of BNP and NT-proBNP. To improve the chance of finding appropriate and available data we used an optimal electronic search for retrieving scientifically strong studies of diagnosis from MEDLINE developed by Haynes et al. [19–21]”<br>Comment: supplemental searches not conducted. |
| Balance of studies per journal in comparison arms (end vs. non)                                                | High      | End: 4 articles from 2 journals<br>Non-end: 21 articles from 16 journals<br>Comment: Appears to be balanced in each arm.                                                                                                                                                                                                                                                                                                                          |
| Balance of studies per journal in comparison arms (after vs. before)                                           | n/a       | n/a                                                                                                                                                                                                                                                                                                                                                                                                                                               |
| Sampling took place in the period following the publication of the reporting guideline (after vs. before only) | n/a       | n/a                                                                                                                                                                                                                                                                                                                                                                                                                                               |

#### Paranjothy 2007

| Item                                                | Judgement | Support for judgement                                                                                                                         |
|-----------------------------------------------------|-----------|-----------------------------------------------------------------------------------------------------------------------------------------------|
| Two or more assessors for completeness of reporting | High      | Quote: “Two reviewers (B.P. and M.S.) independently evaluated the quality of reporting of each included study. Disagreements were resolved by |

|                                                                                                                |      |                                                                                                                                                                                                                                                                                                                                                                                                                                                  |
|----------------------------------------------------------------------------------------------------------------|------|--------------------------------------------------------------------------------------------------------------------------------------------------------------------------------------------------------------------------------------------------------------------------------------------------------------------------------------------------------------------------------------------------------------------------------------------------|
|                                                                                                                |      | adjudication by a third independent reviewer (A.A.B.).”                                                                                                                                                                                                                                                                                                                                                                                          |
| Number of items assessed as reported in methods section                                                        | High | “The STARD checklist (Table 1) was used to assess the quality of reporting. The current checklist items are arranged under the headings of: (1) Title, abstract, and keywords, (2) Introduction, (3) Methods (11 items), (4) Results (11 items), and (5) Discussion. Each item could be considered to be fully, partially, or not reported according to predefined criteria (Table 2). If the item was “not applicable,” it was marked as such.” |
| Comprehensive search strategy                                                                                  | Low  | “Two reviewers (B.P. and M.S.) independently searched MEDLINE with a validated strategy <sup>13</sup> to identify articles on diagnostic accuracy of glaucoma published between January 1966 and December 2005. A search strategy using Medical Subject Headings and keywords was executed using PubMed.....a hand search of all papers included in the reference list of the short-listed manuscripts was also performed.”                      |
| Balance of studies per journal in comparison arms (end vs. non)                                                | High | End: 1 article from 1 journal<br>Non-end: 8 articles from 4 journals<br>Comment: Appears to be balanced in each arm.                                                                                                                                                                                                                                                                                                                             |
| Balance of studies per journal in comparison arms (after vs. before)                                           | n/a  | n/a                                                                                                                                                                                                                                                                                                                                                                                                                                              |
| Sampling took place in the period following the publication of the reporting guideline (after vs. before only) | n/a  | n/a                                                                                                                                                                                                                                                                                                                                                                                                                                              |

## STRICTA, 2002

Hammerschlag, 2011

| Item                                                            | Judgement | Support for judgement                                                                                                                                                                                                                                                                                                      |
|-----------------------------------------------------------------|-----------|----------------------------------------------------------------------------------------------------------------------------------------------------------------------------------------------------------------------------------------------------------------------------------------------------------------------------|
| Two or more assessors for completeness of reporting             | Low       | Quote: “Results for the first eight articles were group consensus scores; results for the remaining articles were from single raters.”                                                                                                                                                                                     |
| Number of items assessed as reported in methods section         | High      | Quote (methods): “Each of the 27 OCSI questions...”<br>Quote (results): “OCSI scores per individual question across all trials are presented in Figure 1...it is of interest that 7 of the 27 questions...”<br>Comments: Figure 1 shows data for 27 items.                                                                 |
| Comprehensive search strategy                                   | Low       | Quote: “Databases that were searched to identify articles included MEDLINE, the Cochrane Central Register of Controlled Trials, Alt HealthWatch, AMED, University of Maryland CAMPAIN, and the Oregon College of Oriental Medicine library database...in addition, hand searches were performed of the reference lists...” |
| Balance of studies per journal in comparison arms (end vs. non) | Unclear   | Endorser arm: 3 journals with 8, 7, and 2 studies, respectively.<br>Non-endorser arm: 64 journals with a total of 130 studies: 3 journals with 5-7 studies each; 12 journals                                                                                                                                               |

| Item                                                                                                           | Judgement | Support for judgement                                                                                                                                                                                                                                      |
|----------------------------------------------------------------------------------------------------------------|-----------|------------------------------------------------------------------------------------------------------------------------------------------------------------------------------------------------------------------------------------------------------------|
|                                                                                                                |           | with 2-3 studies each; and remaining journals with 1 study each.<br>Comment: based on the above information, it was unclear whether estimates would be driven by a journal subset.                                                                         |
| Balance of studies per journal in comparison arms (after vs. before)                                           | Unclear   | 2 journals in assessment.<br>After endorsement: 7 and 4 studies, respectively<br>Before endorsement: 2 studies per journal.<br>Comment: based on information in the 'after' arm, it is unclear whether the observed clustering would affect the estimates. |
| Sampling took place in the period following the publication of the reporting guideline (after vs. before only) | Low       | Articles the 'before endorsement' arm were published (1999-2001) before the reporting guideline was published (2003-2005).                                                                                                                                 |

## STROBE, 2007

Parsons, 2011

| Item                                                            | Judgement | Support for judgement                                                                                                                                                                                                                                                                                                                                                                                                                                                                                                                                                                                                                                                                                                                 |
|-----------------------------------------------------------------|-----------|---------------------------------------------------------------------------------------------------------------------------------------------------------------------------------------------------------------------------------------------------------------------------------------------------------------------------------------------------------------------------------------------------------------------------------------------------------------------------------------------------------------------------------------------------------------------------------------------------------------------------------------------------------------------------------------------------------------------------------------|
| Two or more assessors for completeness of reporting             | Low       | Quote: "After random ordering, odd-numbered papers were read by one statistician (NRP) and even-numbered papers by the other (CLP). Assessments were undertaken independently, after initial discussion and agreement on any issues that were considered to be problematic"                                                                                                                                                                                                                                                                                                                                                                                                                                                           |
| Number of items assessed as reported in methods section         | Unclear   | Quote: "a clinically trained member of the study team (RH) assessed the RCTs using the Consolidated Standards of Reporting Trials (CONSORT) guidelines and the Strengthening the Reporting of Observational studies in Epidemiology (STROBE) guidelines."<br>Comment: number of items not specifically reported.                                                                                                                                                                                                                                                                                                                                                                                                                      |
| Comprehensive search strategy                                   | Low       | Quote: "we sampled 100 papers from selected peer-reviewed general orthopaedic journals...limited to no more than one paper from any single research group...excluding papers published by research groups based at our own institutions."<br>Figure 1: Bibliographic database Medline (January 2005 to February 2010)<br>(i) <i>Journal of Bone and Joint Surgery (American)</i><br>(ii) <i>Clinical Orthopaedics and Related Research</i><br>(iii) <i>Journal of Bone and Joint Surgery (British)</i><br>(iv) <i>Acta Orthopædica</i><br>(v) <i>Archives of Orthopaedic and Trauma Surgery</i><br>(vi) <i>International Orthopaedics</i><br>(vii) <i>BMC Musculoskeletal Disorders</i><br>Comment: sample limited as described above |
| Balance of studies per journal in comparison arms (end vs. non) | Low       | End: 9 articles from 2 journals<br>Non-End: 38 articles from 6 journals<br>Comment: in the non-endorser arm, 50% of studies were clustered in one journal.                                                                                                                                                                                                                                                                                                                                                                                                                                                                                                                                                                            |
| Balance of studies per journal in comparison arms (after vs.    | Low       | Before: 11 studies from 2 journals<br>After: 9 studies from 2 journals                                                                                                                                                                                                                                                                                                                                                                                                                                                                                                                                                                                                                                                                |

|                                                                                                                |     |                                                                                                                   |
|----------------------------------------------------------------------------------------------------------------|-----|-------------------------------------------------------------------------------------------------------------------|
| before)                                                                                                        |     | Comment: majority of studies in 'after' clustered in one journal.                                                 |
| Sampling took place in the period following the publication of the reporting guideline (after vs. before only) | Low | Search for articles published in journals from January 2005 to February 2010<br>Comment: STROBE published in 2007 |

Delaney, 2010

| Item                                                                                                           | Judgement | Support for judgement                                                                                                                                                                                                                                                                                                                                                                                                                                                                                                                                                                     |
|----------------------------------------------------------------------------------------------------------------|-----------|-------------------------------------------------------------------------------------------------------------------------------------------------------------------------------------------------------------------------------------------------------------------------------------------------------------------------------------------------------------------------------------------------------------------------------------------------------------------------------------------------------------------------------------------------------------------------------------------|
| Two or more assessors for completeness of reporting                                                            | High      | Quote: "The manuscripts were divided among six review teams that were each composed of two of the investigators. Each reviewer evaluated the article content independently using the appropriate critique tools."                                                                                                                                                                                                                                                                                                                                                                         |
| Number of items assessed as reported in methods section                                                        | Unclear   | Quote: "OBS were critiqued with the STROBE statement checklist"<br>Comment: number of items not reported.                                                                                                                                                                                                                                                                                                                                                                                                                                                                                 |
| Comprehensive search strategy                                                                                  | Low       | Quote: "we performed a search of MEDLINE (1996-October 2008) using "platelet transfusion" as the key search term. The search start year (1996) was chosen because it was the year the CONSORT statement was published. The search was limited to those published in the English language, involving humans, and to core clinical journals. There was consensus to include additional journals with specific relevance to transfusion medicine that were not included in the core clinical journals by MEDLINE"<br>Comment: one database searched, and no supplemental searches conducted. |
| Balance of studies per journal in comparison arms (end vs. non)                                                | High      | End: 1 article from 1 journal<br>Non-end: 4 articles from 3 journals<br>Comment: Appears to be balanced in each arm.                                                                                                                                                                                                                                                                                                                                                                                                                                                                      |
| Balance of studies per journal in comparison arms (after vs. before)                                           | n/a       | n/a                                                                                                                                                                                                                                                                                                                                                                                                                                                                                                                                                                                       |
| Sampling took place in the period following the publication of the reporting guideline (after vs. before only) | n/a       | n/a                                                                                                                                                                                                                                                                                                                                                                                                                                                                                                                                                                                       |

## Appendix 7. Individual meta-analysis forest plots for reporting guideline checklist items and mean summed score.

Separate forest plots for each checklist item from a reporting guideline are shown below. To describe further, the first forest plot is a checklist item from the BMJ Economics reporting guideline. Each ‘study’ in the forest plot represents an evaluation (e.g., Herman 2005). For each evaluation, the comparison is endorsing journals (‘intervention’) versus non-endorsing journals (‘control’). For each arm of the comparison, the ‘events’ refers to the number of studies that had completely reported the checklist item of the ‘total’ number of studies (from either endorsing or non-endorsing journals) in the timeperiod of interest (in the case of Herman 2005, from publication years 2003-2004). The total number of evaluations (e.g., n=1) and studies (e.g., n=13) and their effect estimates (e.g., RR 1.18, 99% CI 0.52 to 2.67) were entered in Comprehensive Meta-analysis to create the summary plot ‘snapshot’ of checklist items for a given reporting guideline as shown in Figure 4-14).

In the case where the comparison in the forest plots is after versus before endorsement, the convention of ‘intervention’ and ‘control’ arms, respectively, still holds.

BMJ – Economic importance of question for endorsing compared with non-endorsing journals.

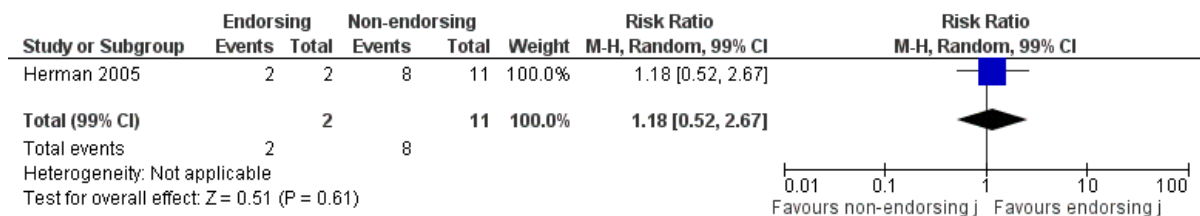

BMJ – Clearly describe alternatives being compared for endorsing compared with non-endorsing journals.

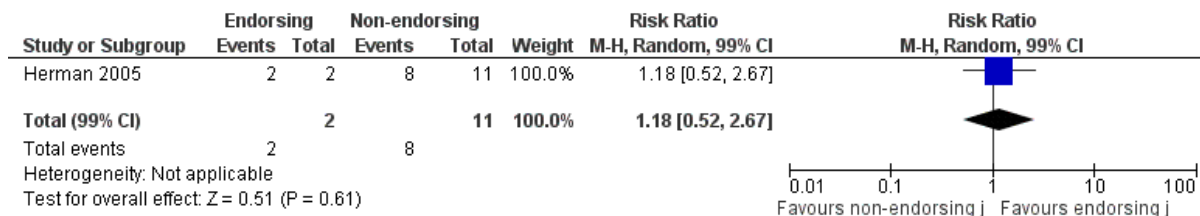

BMJ – State form of economic evaluation for endorsing compared with non-endorsing journals.

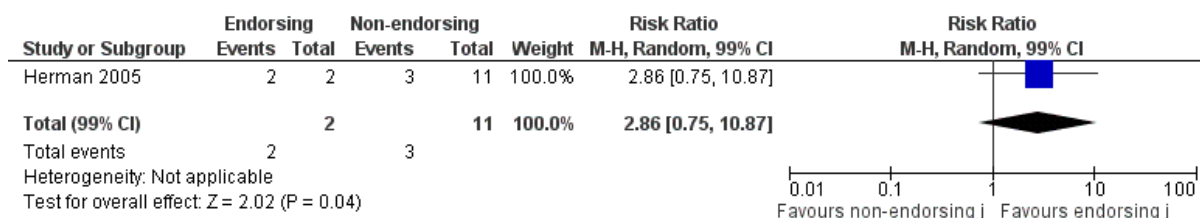

BMJ – Justify choice of economic evaluation for endorsing compared with non-endorsing journals.

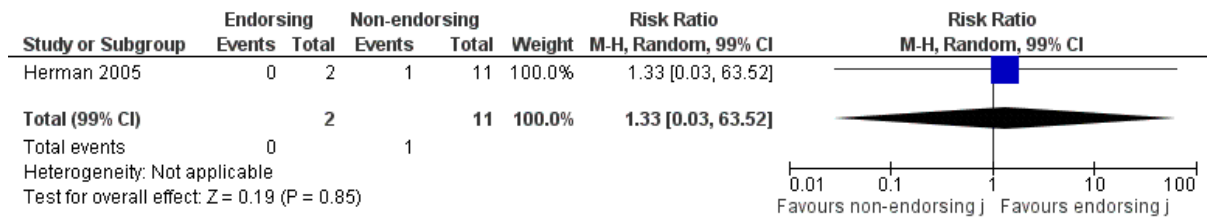

BMJ – State source(s) of effectiveness estimates for endorsing compared with non-endorsing journals.

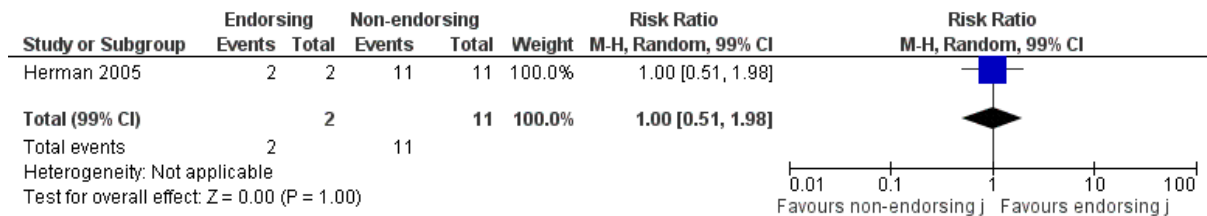

BMJ – Give details of design and results of effectiveness study (single study) for endorsing compared with non-endorsing journals.

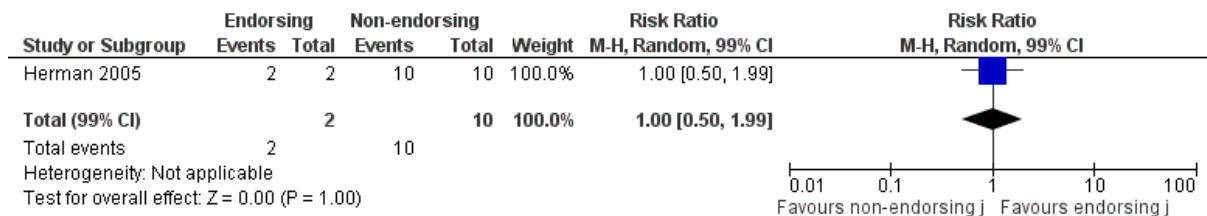

BMJ – State primary economic evaluation outcomes measure(s) for endorsing compared with non-endorsing journals.

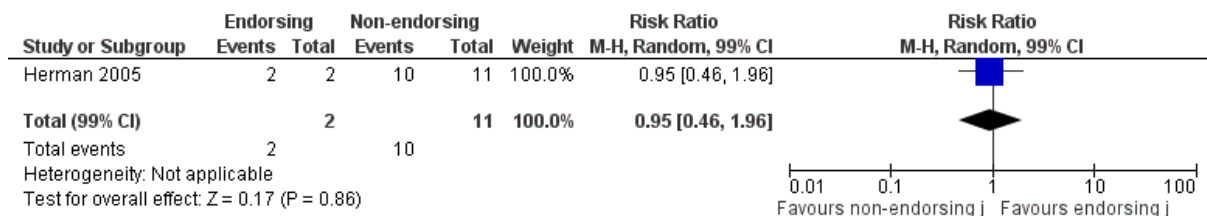

BMJ – Give details of subjects from whom valuations obtained for endorsing compared with non-endorsing journals.

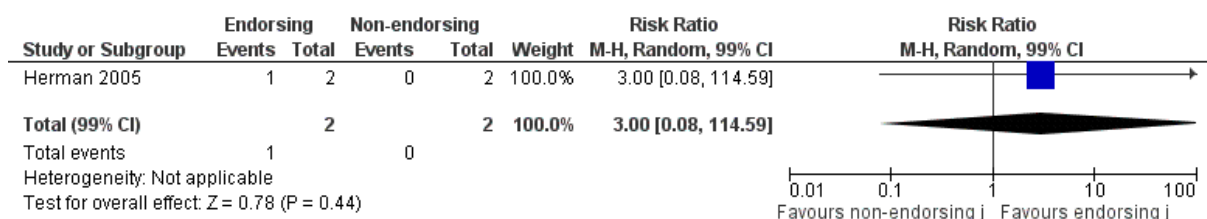

BMJ – Report quantities of resources separate from unit costs for endorsing compared with non-endorsing journals.

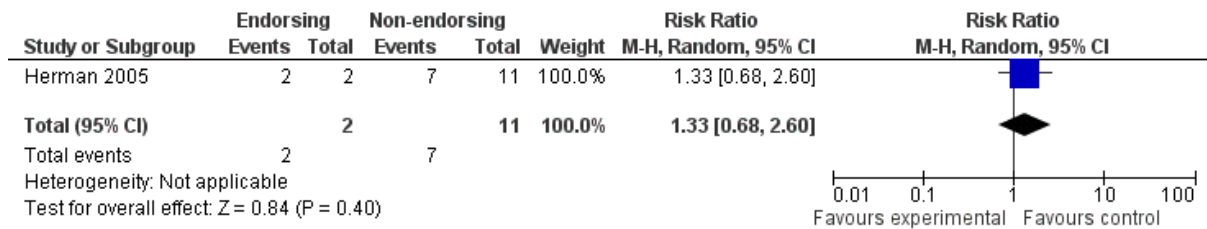

BMJ – Describe methods for estimation of quantities and unit costs for endorsing compared with non-endorsing journals.

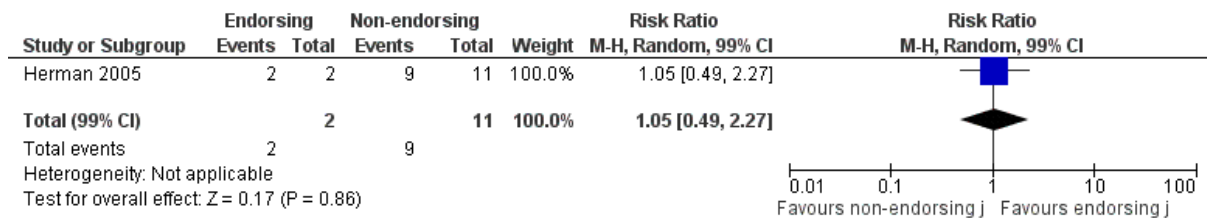

BMJ – Give details of currency of price adjustments for inflation or currency conversion for endorsing compared with non-endorsing journals.

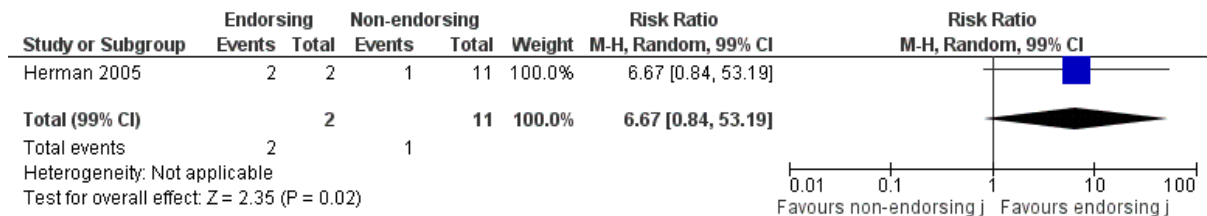

BMJ – State time horizon of costs and benefits for endorsing compared with non-endorsing journals.

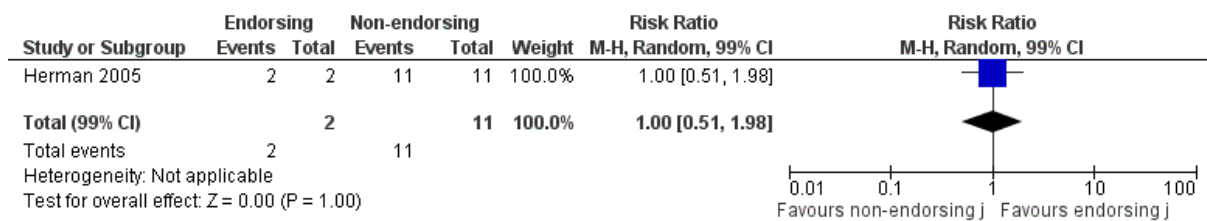

BMJ – Give details of statistical tests and CIs for stochastic data for endorsing compared with non-endorsing journals.

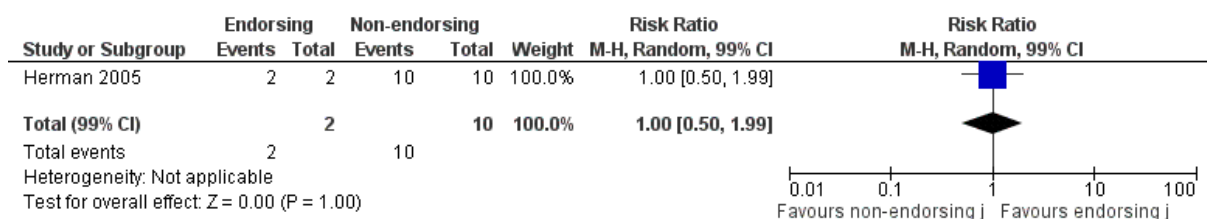

BMJ – Compare relevant alternatives for endorsing compared with non-endorsing journals.

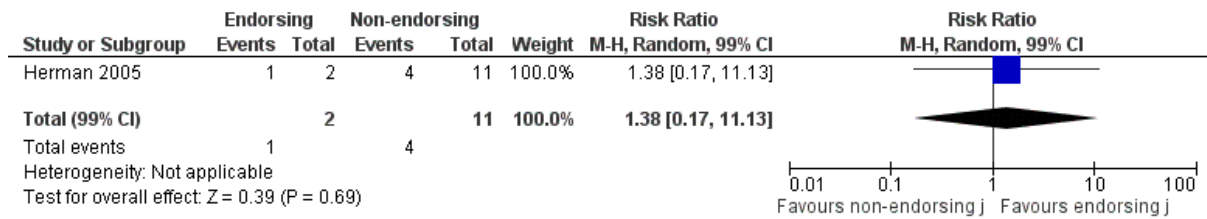

BMJ – Report incremental analysis for endorsing compared with non-endorsing journals.

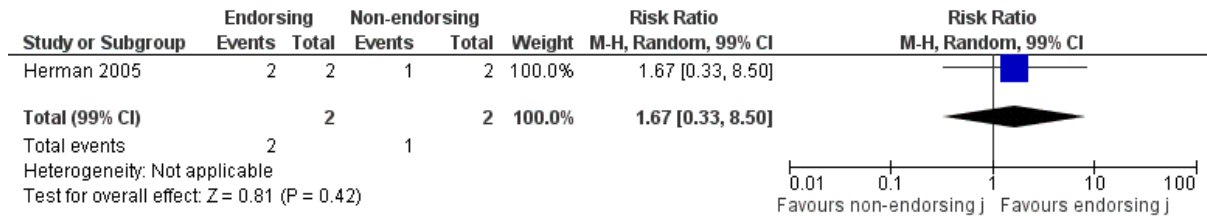

BMJ – Major outcomes presented in aggregated and disaggregated forms for endorsing compared with non-endorsing journals.

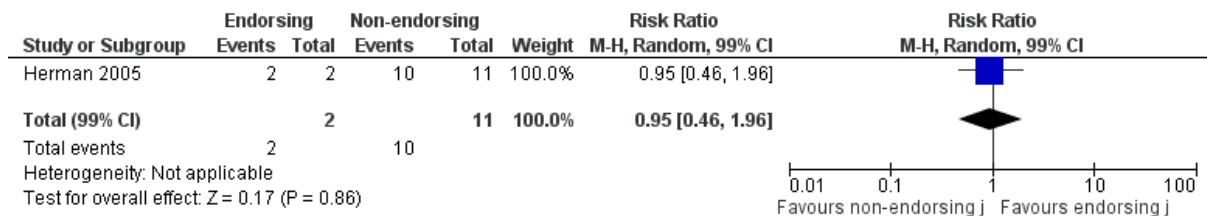

BMJ – Give answer to study question for endorsing compared with non-endorsing journals.

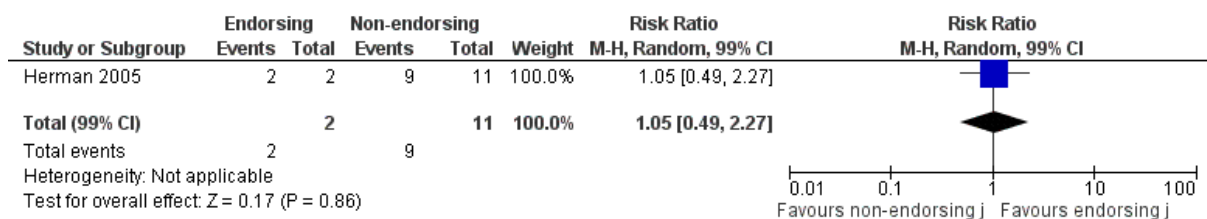

BMJ – Conclusions follow from the data for endorsing compared with non-endorsing journals.

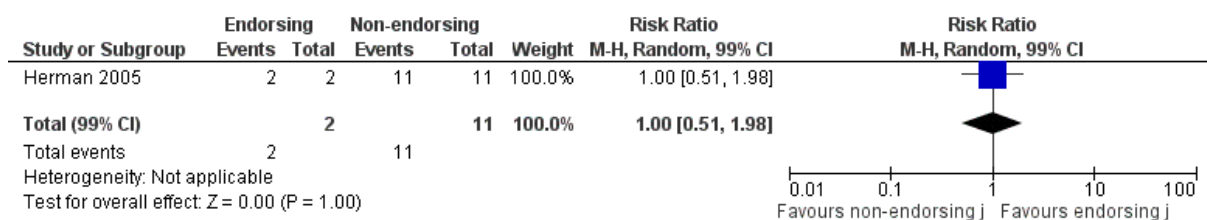

BMJ – Conclusions accompanied by appropriate caveats for endorsing compared with non-endorsing journals.



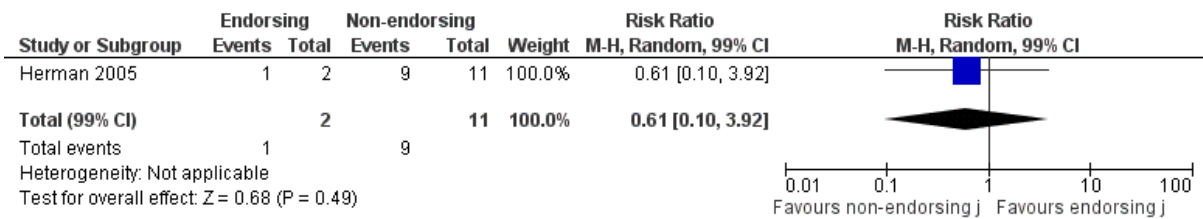

CONSORT for Harms – Title/abstract state data on harms and benefits for endorsing compared with non-endorsing journals.

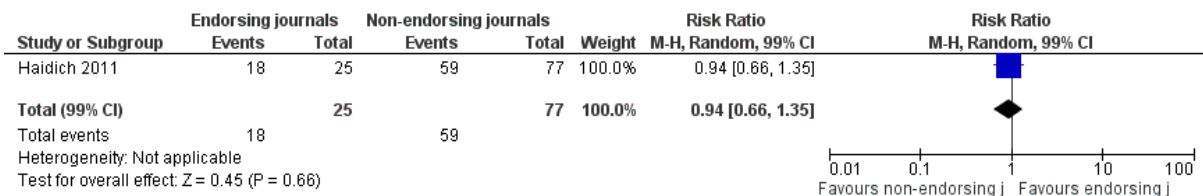

CONSORT for Harms – Introduction states data on harms and benefits for endorsing compared with non-endorsing journals.

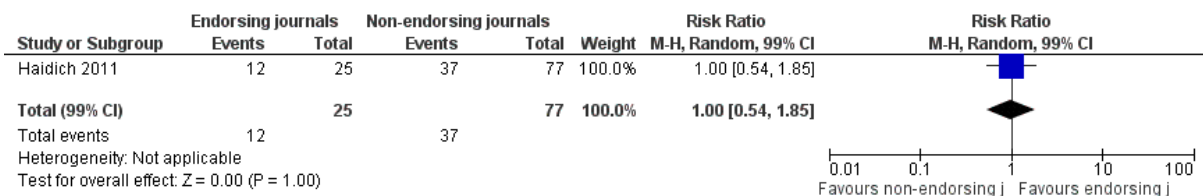

CONSORT for Harms – Outcomes: list of adverse events and definitions for endorsing compared with non-endorsing journals.

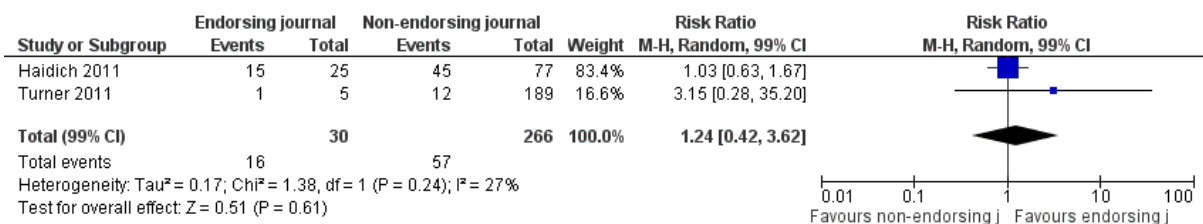

CONSORT for Harms – Outcomes: clarifies how harms collected for endorsing compared with non-endorsing journals.

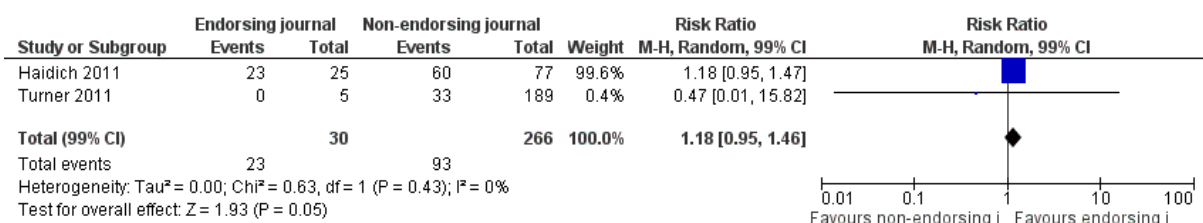

CONSORT for Harms – Statistical methods (presenting and analyzing harms) for endorsing compared with non-endorsing journals.

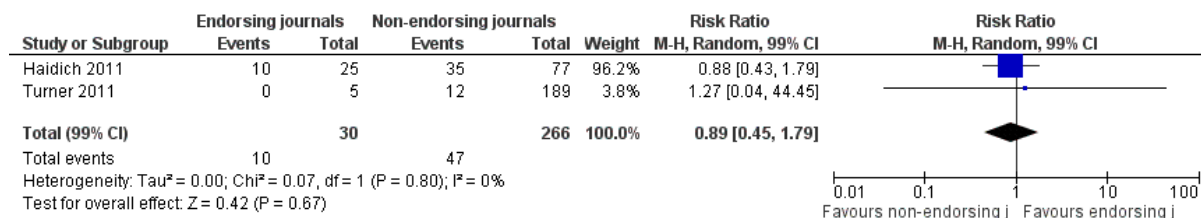

CONSORT for Harms – Participant flow (withdrawals for each arm) for endorsing compared with non-endorsing journals.

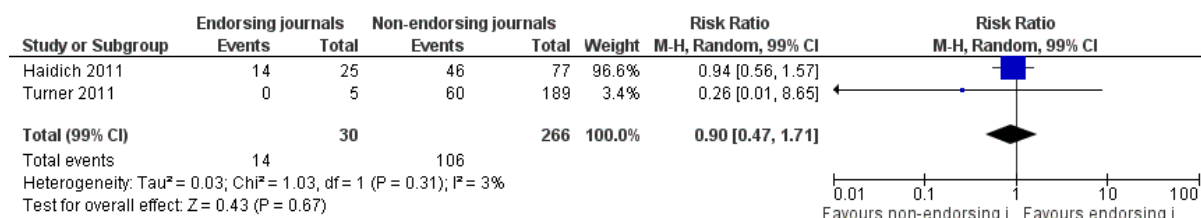

CONSORT for Harms – Numbers analyzed (denominator for harms analyses) for endorsing compared with non-endorsing journals.

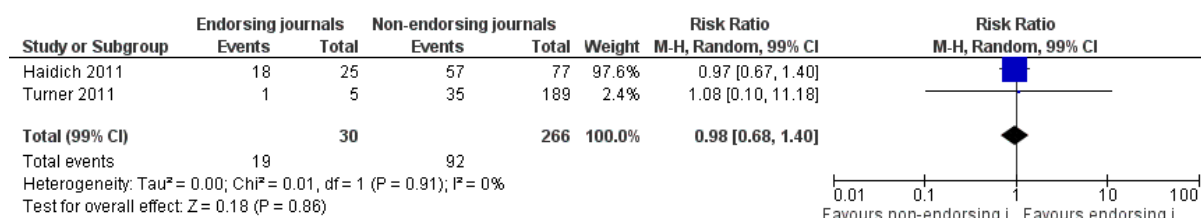

CONSORT for Harms – Absolute risk/appropriate metrics for endorsing compared with non-endorsing journals.

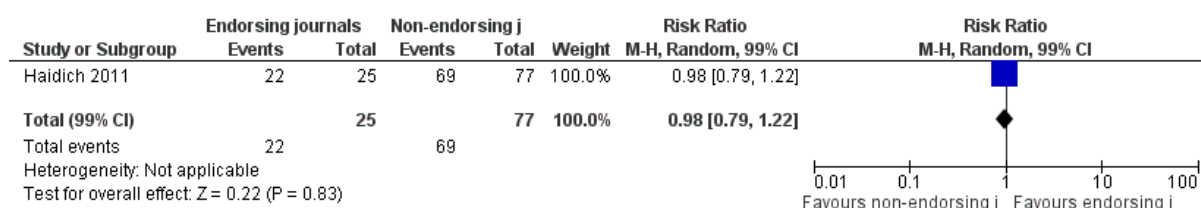

CONSORT for Harms – Subgroup/exploratory analyses for endorsing compared with non-endorsing journals.

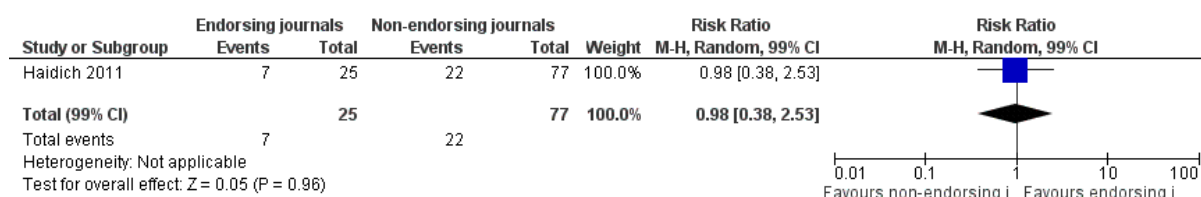

CONSORT for Harms – Balanced discussion for endorsing compared with non-endorsing journals.

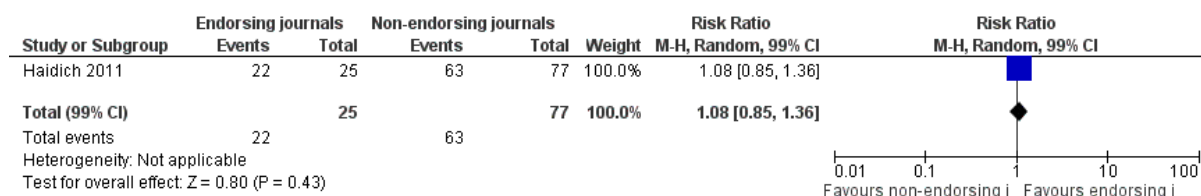

CONSORT for Harms – Mean summed score for endorsing compared with non-endorsing journals.

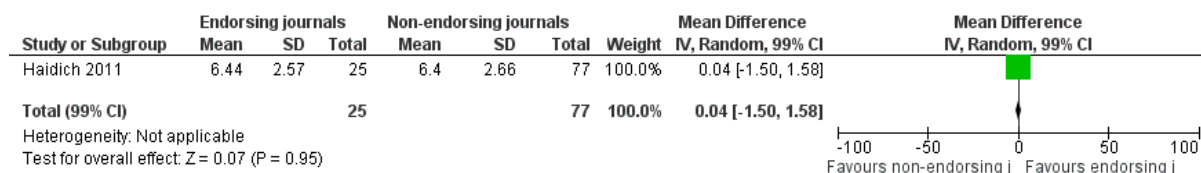

PRISMA – Title for endorsing compared with non-endorsing journals.

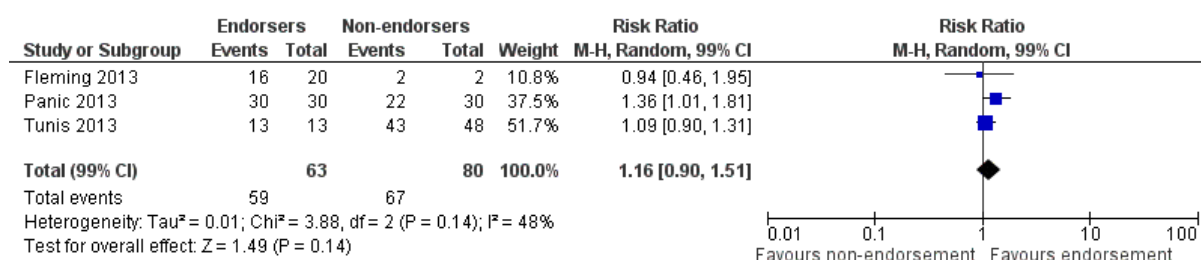

PRISMA – Structured summary for endorsing compared with non-endorsing journals.

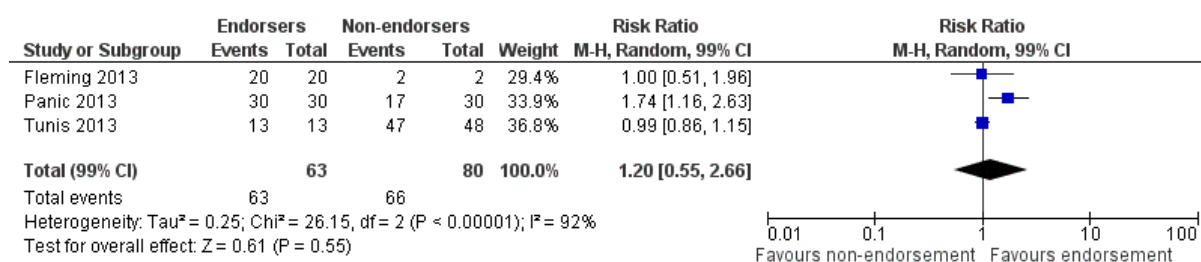

PRISMA – Rationale for endorsing compared with non-endorsing journals.

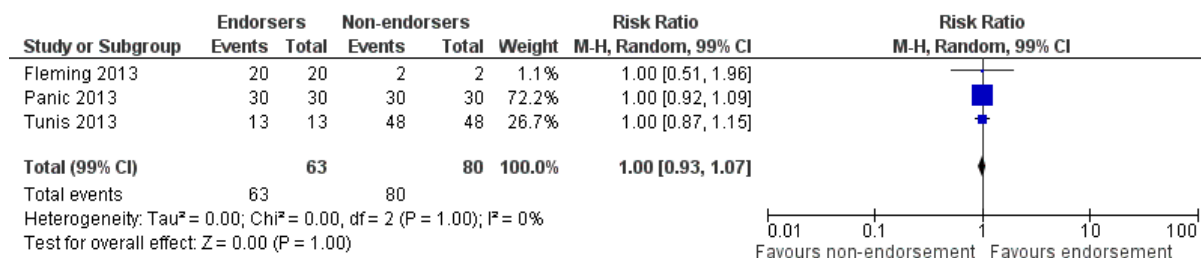

PRISMA – Objectives for endorsing compared with non-endorsing journals.

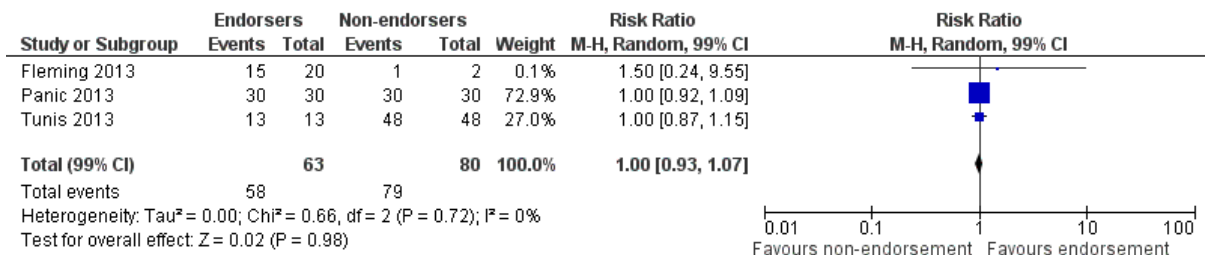

PRISMA – Methods, Protocol and registration for endorsing compared with non-endorsing journals.

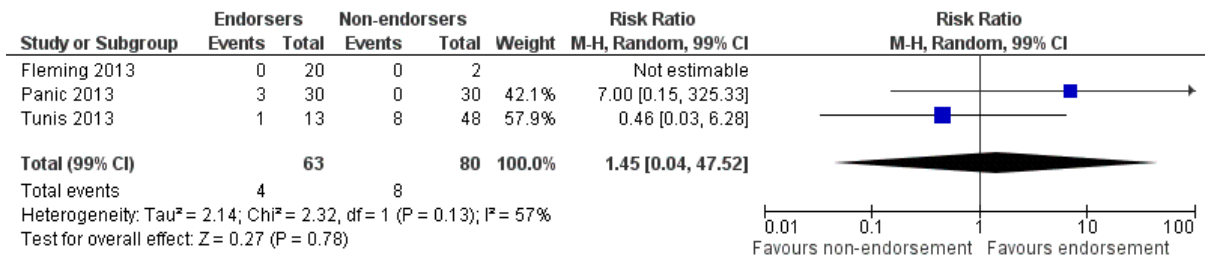

PRISMA – Methods, Eligibility criteria for endorsing compared with non-endorsing journals.

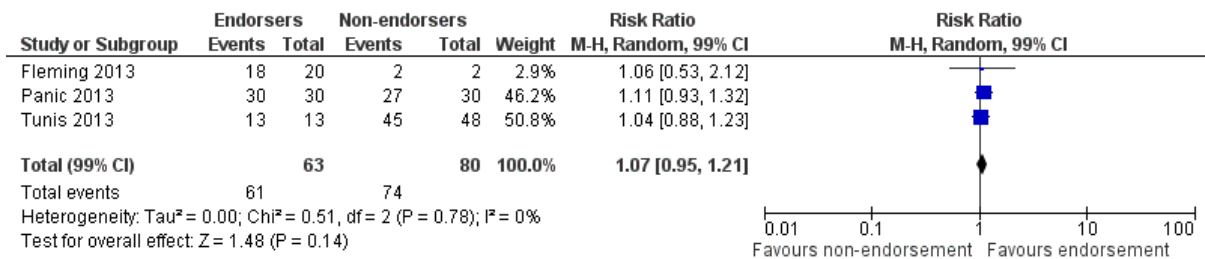

PRISMA – Methods, Information sources for endorsing compared with non-endorsing journals.

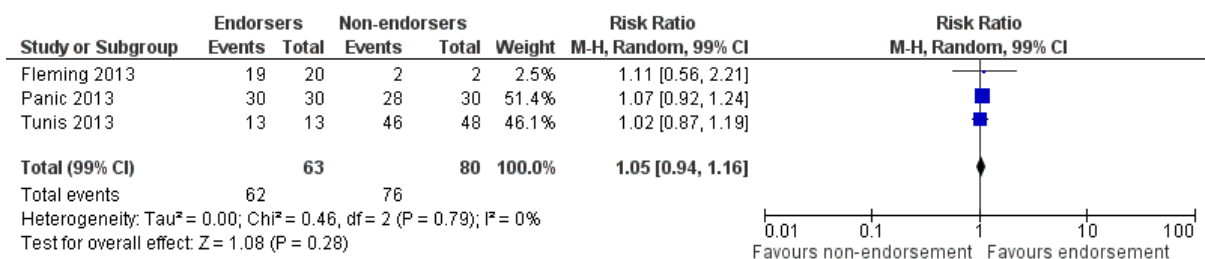

PRISMA – Methods, Search for endorsing compared with non-endorsing journals.

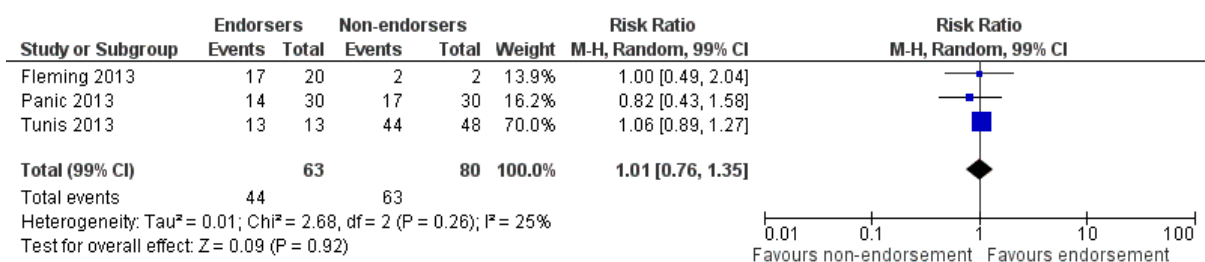

PRISMA – Methods, Study selection for endorsing compared with non-endorsing journals.

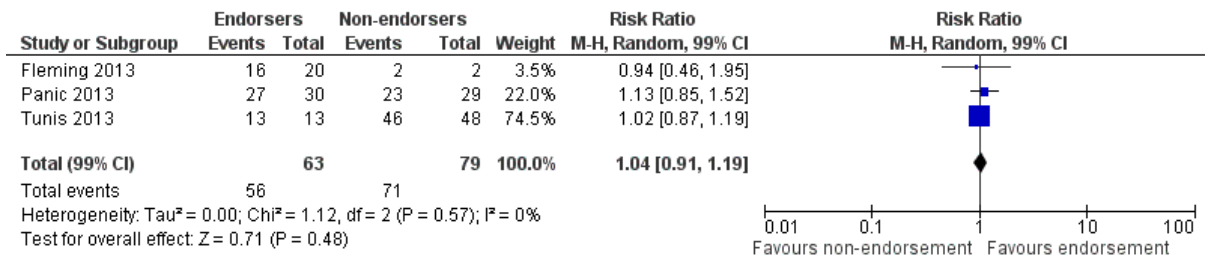

PRISMA – Methods, Data collection process for endorsing compared with non-endorsing journals.

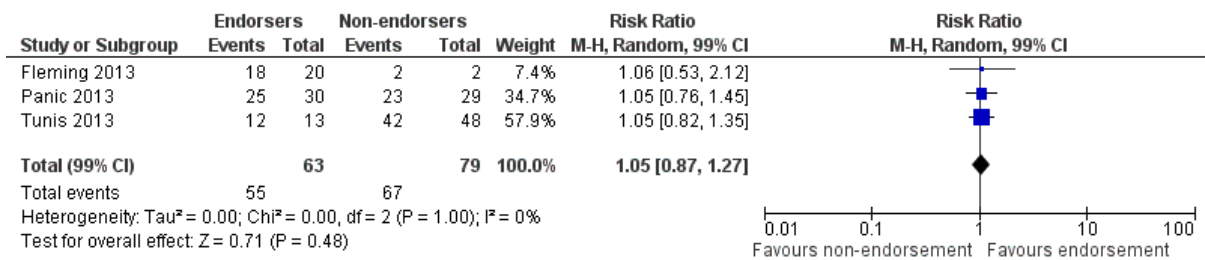

PRISMA – Methods, Data items for endorsing compared with non-endorsing journals.

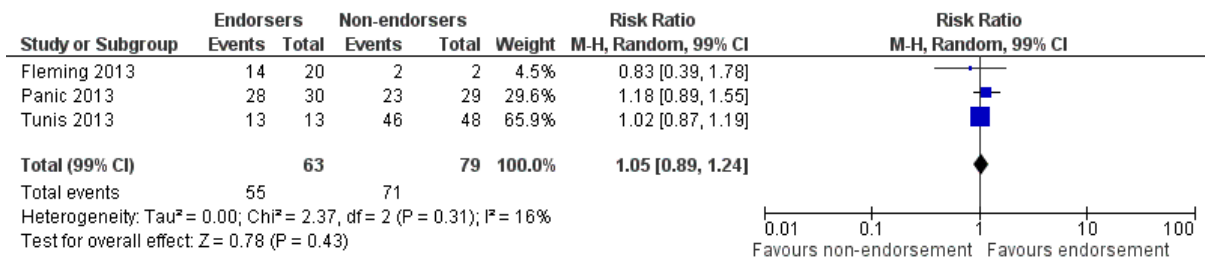

PRISMA – Methods, Risk of bias for individual studies for endorsing compared with non-endorsing journals.

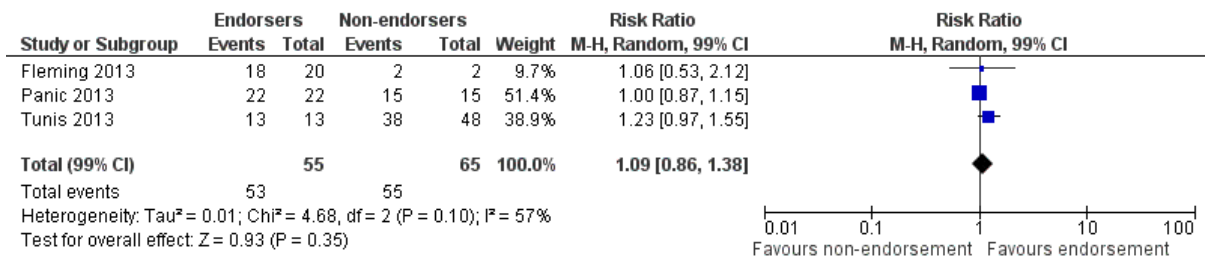

PRISMA – Methods, Summary measures for endorsing compared with non-endorsing journals.

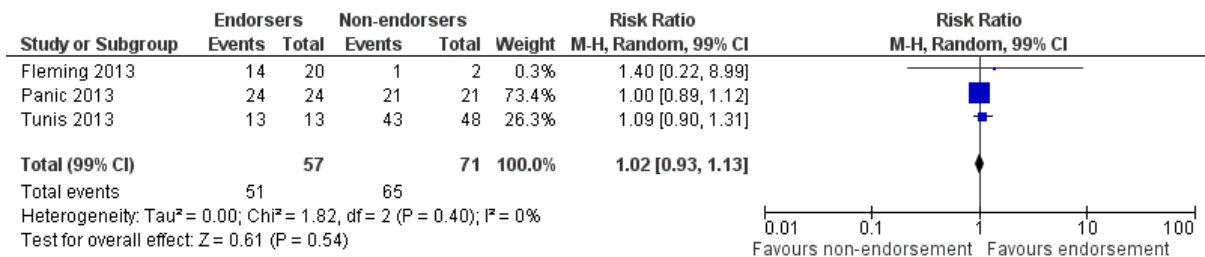

PRISMA – Methods, Synthesis of results for endorsing compared with non-endorsing journals.

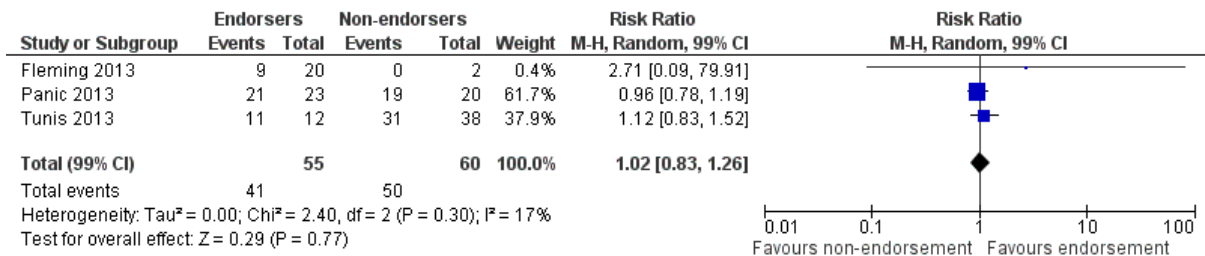

PRISMA – Methods, Risk of bias across studies for endorsing compared with non-endorsing journals.

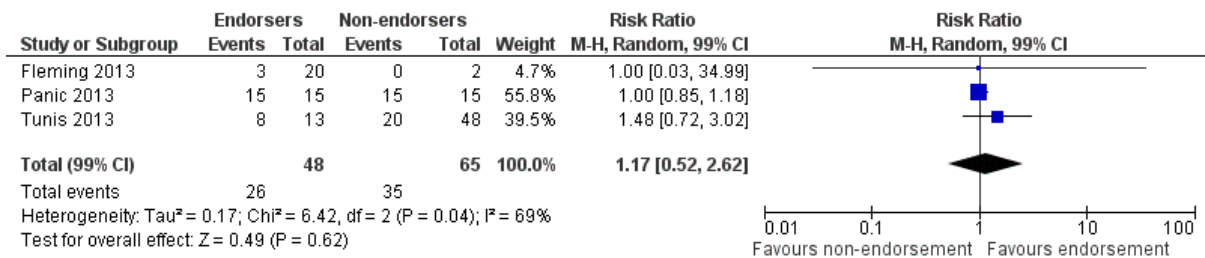

PRISMA – Methods, Additional analyses for endorsing compared with non-endorsing journals.

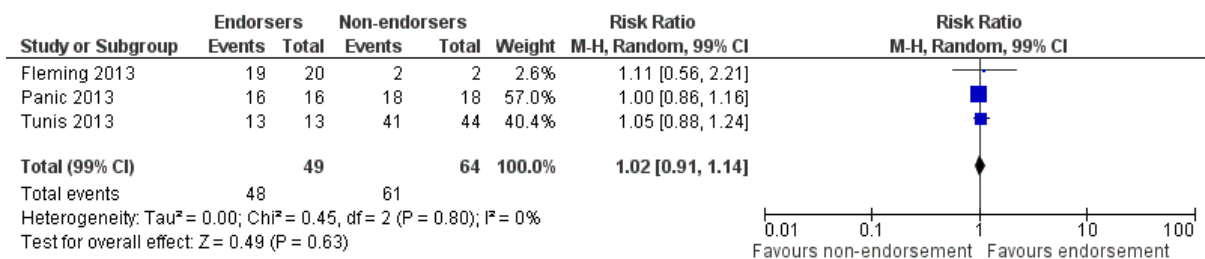

PRISMA – Results, Study selection for endorsing compared with non-endorsing journals.

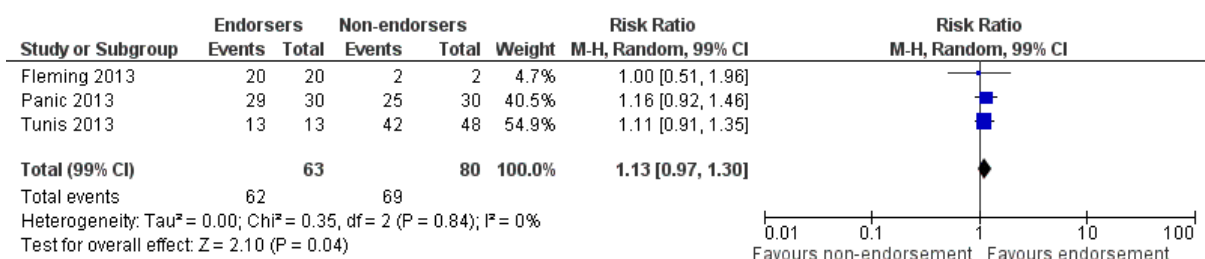

PRISMA – Results, Study characteristics for endorsing compared with non-endorsing journals.

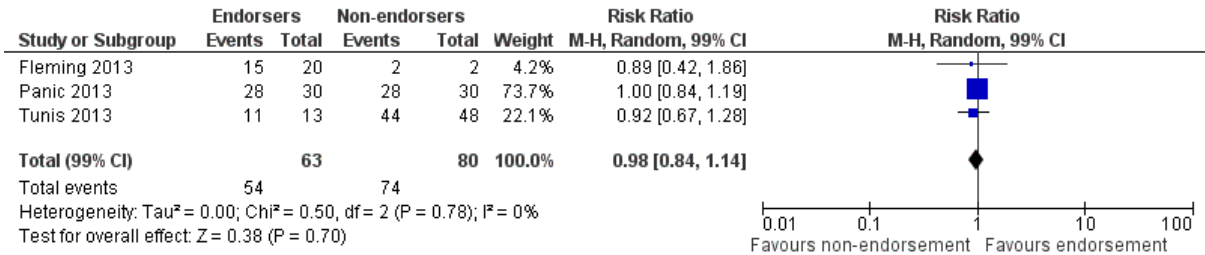

PRISMA – Results, Risk of bias within studies for endorsing compared with non-endorsing journals.

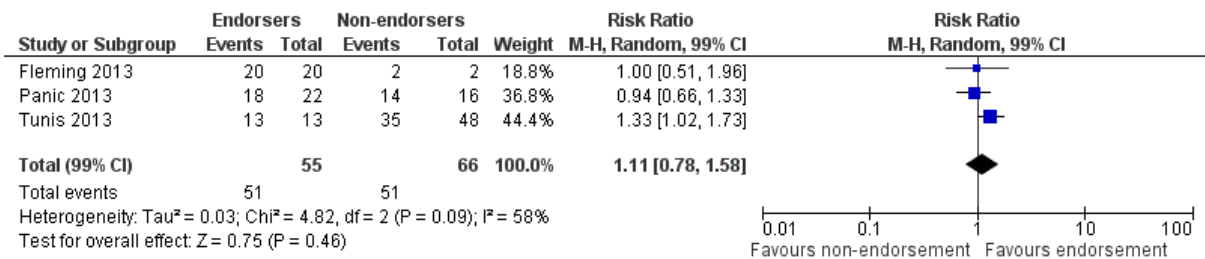

PRISMA – Results, Individual study results for endorsing compared with non-endorsing journals.

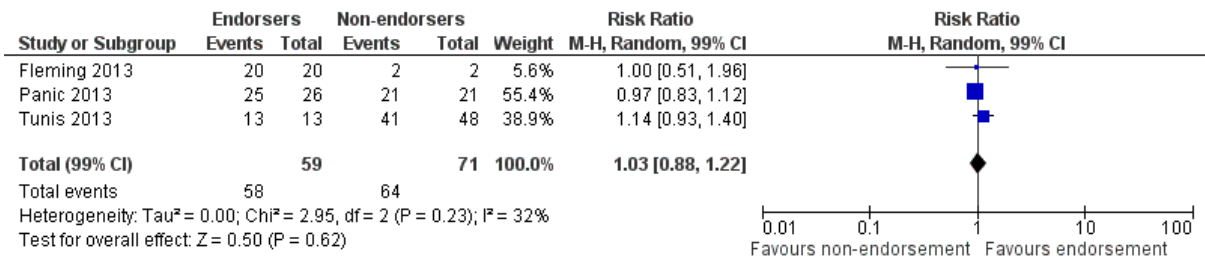

PRISMA – Results, Synthesis of results for endorsing compared with non-endorsing journals.

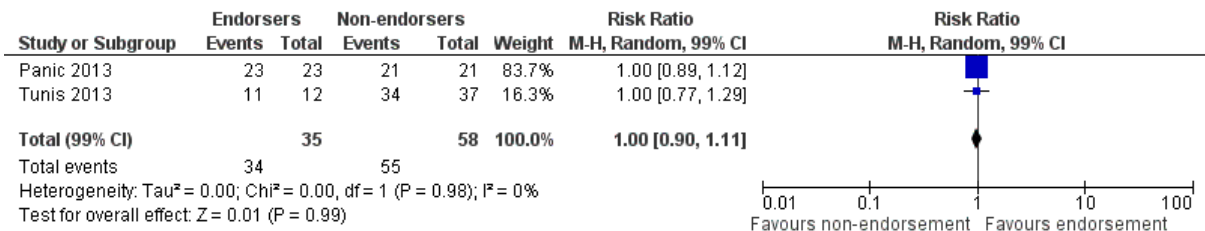

PRISMA – Results, Risk of bias across studies for endorsing compared with non-endorsing journals.



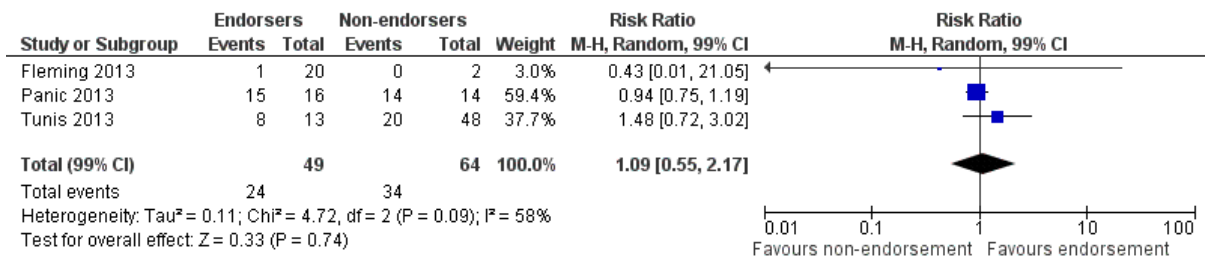

PRISMA – Results, Additional analysis for endorsing compared with non-endorsing journals.

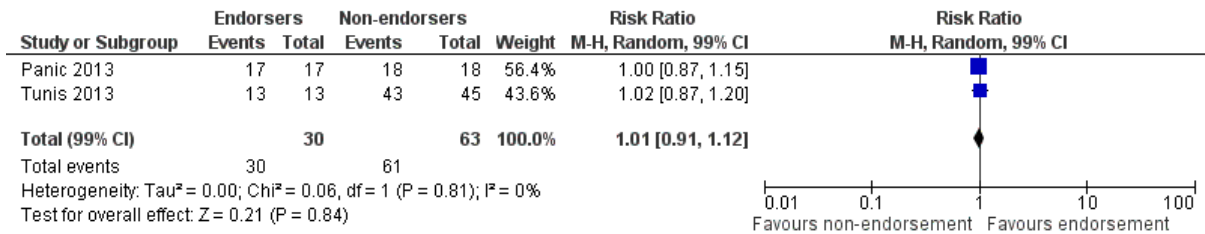

PRISMA – Discussion, Summary of evidence for endorsing compared with non-endorsing journals.

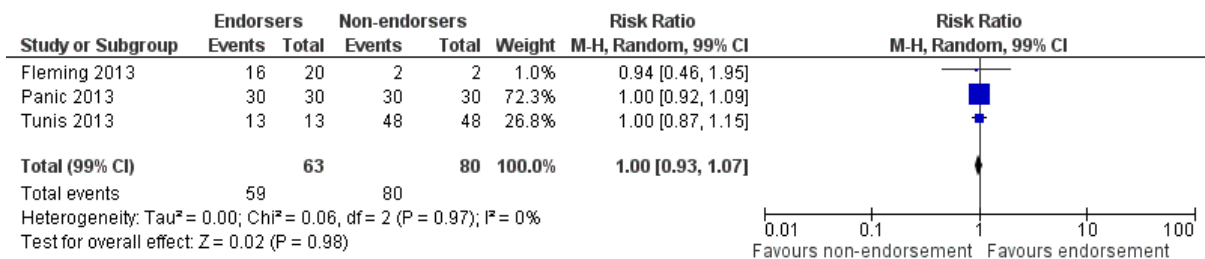

PRISMA – Discussion, Limitations for endorsing compared with non-endorsing journals.

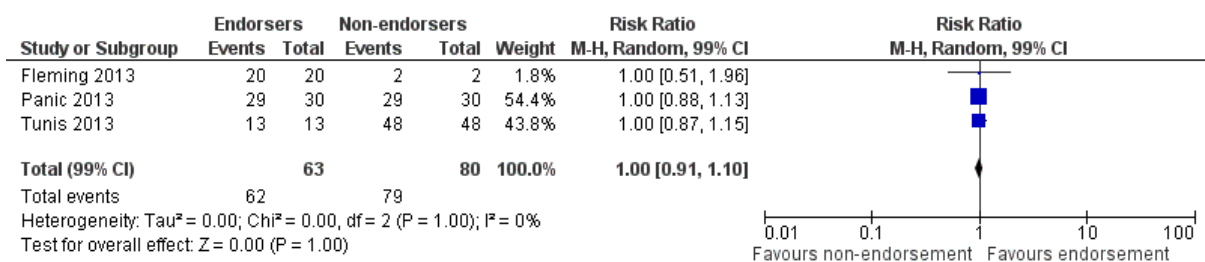

PRISMA – Discussion, Conclusions for endorsing compared with non-endorsing journals.

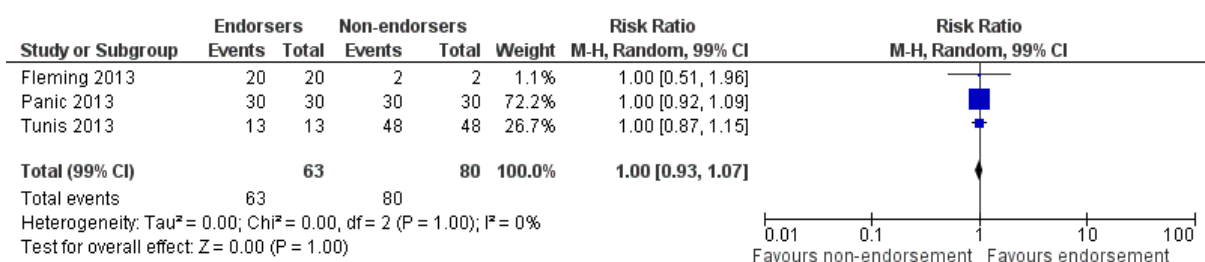

PRISMA – Funding for endorsing compared with non-endorsing journals.



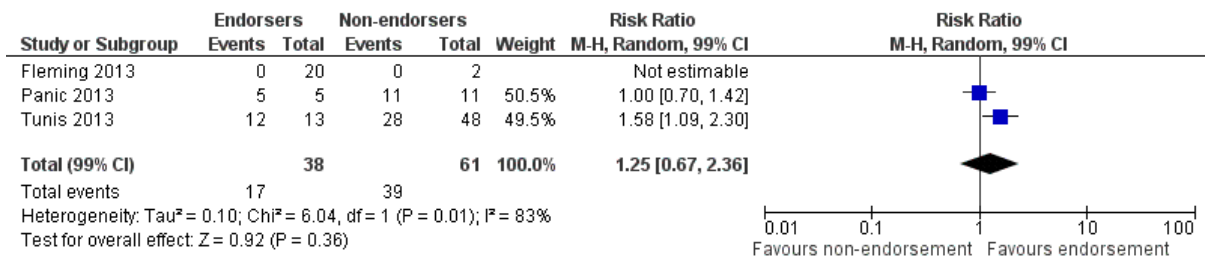

PRISMA – Mean summed score for endorsing compared with non-endorsing journals.

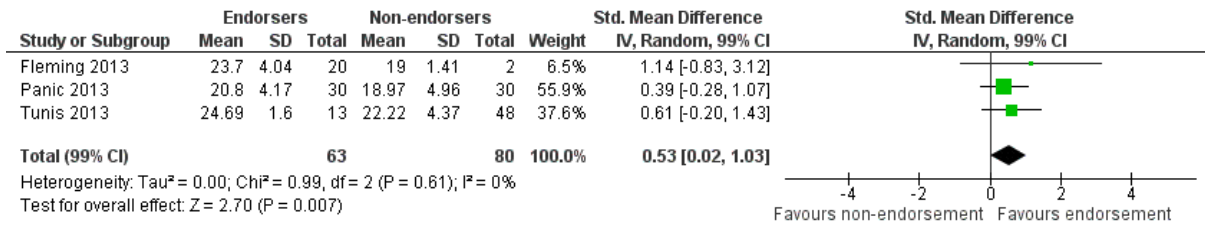

STARD – Title/abstract/keywords for endorsing compared with non-endorsing journals.

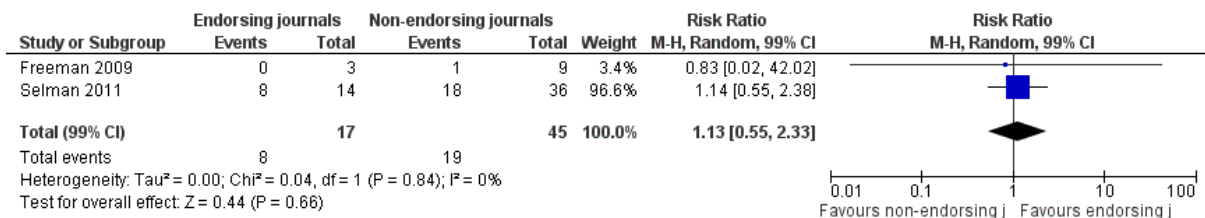

STARD – Introduction for endorsing compared with non-endorsing journals.

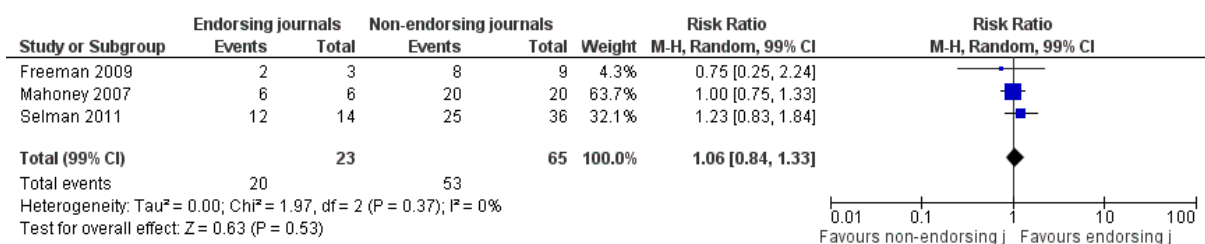

STARD – Participants, Describe population for endorsing compared with non-endorsing journals.

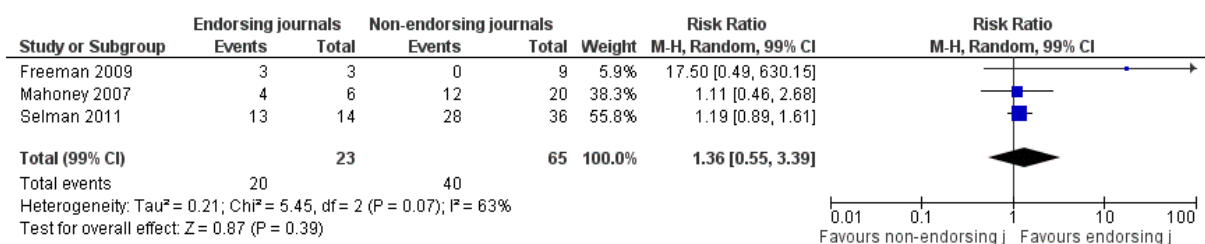

STARD – Participant recruitment for endorsing compared with non-endorsing journals.

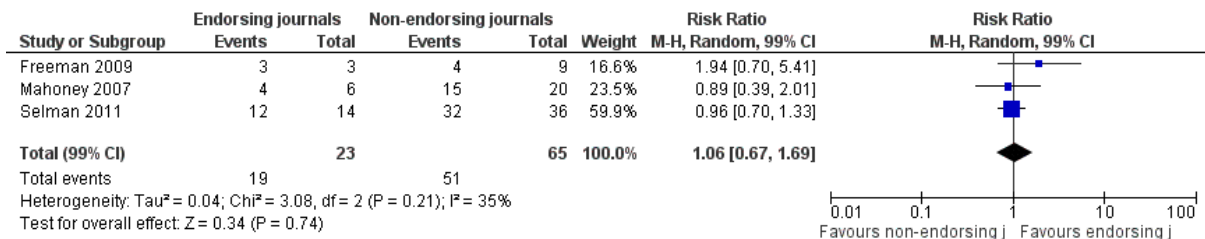

### STARD – Participant sampling for endorsing compared with non-endorsing journals.

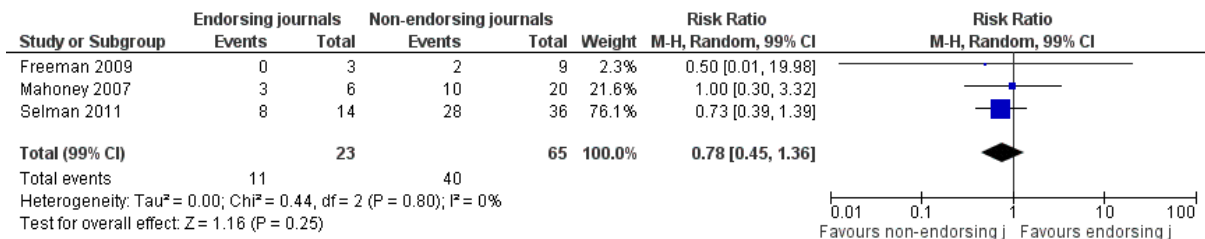

### STARD – Participants, Data collection for endorsing compared with non-endorsing journals.

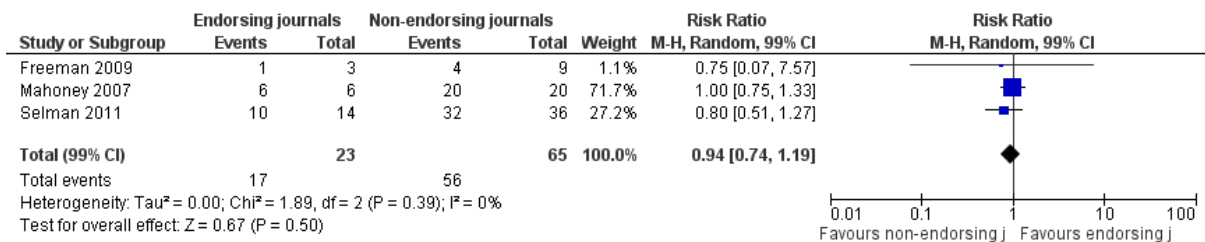

### STARD – Test methods, Describe reference standard for endorsing compared with non-endorsing journals.

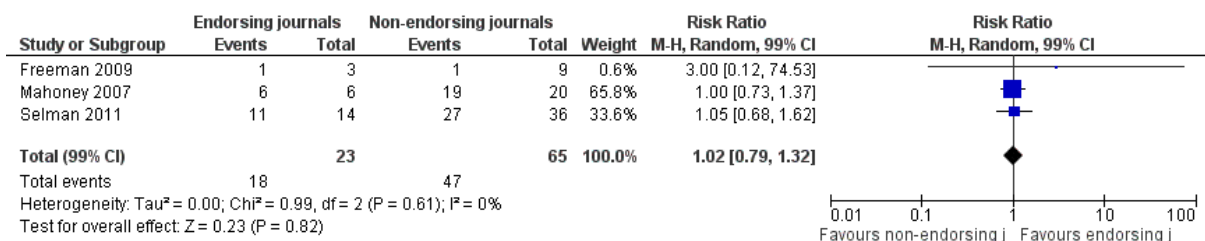

### STARD – Test methods, Describe technical specifications for endorsing compared with non-endorsing journals.

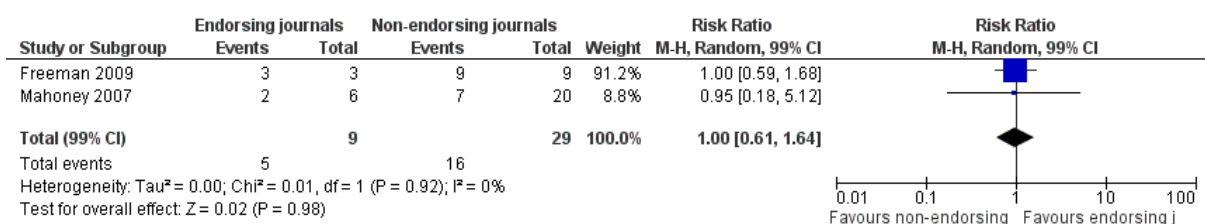

### STARD – Test methods, Cutoffs for index & standard for endorsing compared with non-endorsing journals.

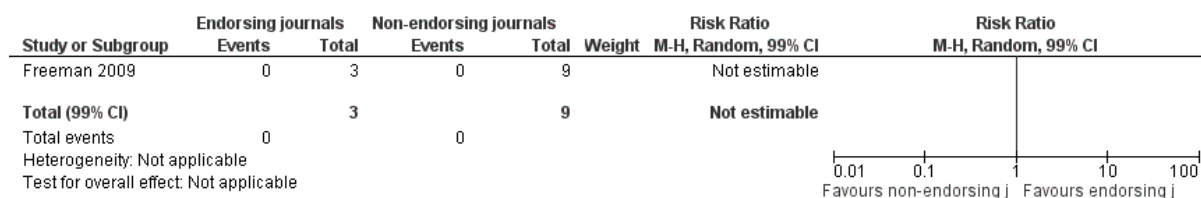

STARD – Describe persons executing index & standar Introduction for endorsing compared with non-endorsing journals.

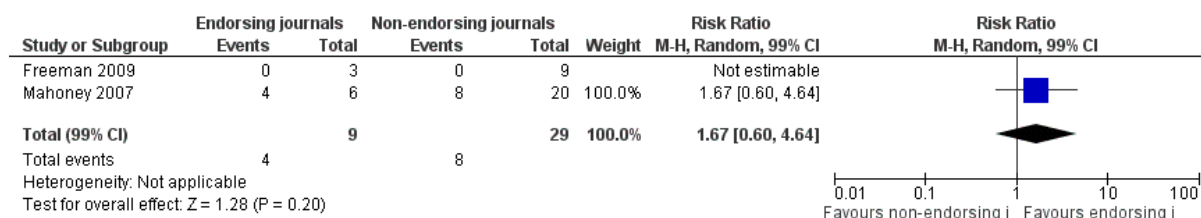

STARD – Test methods, blinding for endorsing compared with non-endorsing journals.

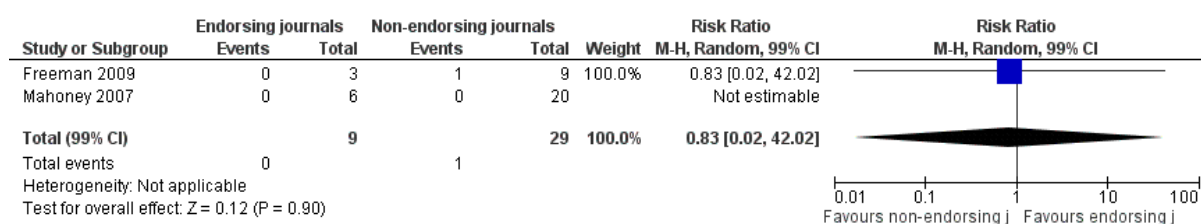

STARD – Statistical methods, Measures & uncertainty for endorsing compared with non-endorsing journals.

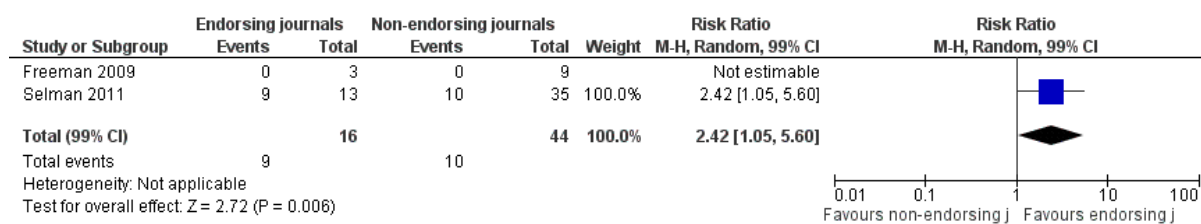

STARD – Statistical methods, Test reproducibility for endorsing compared with non-endorsing journals.

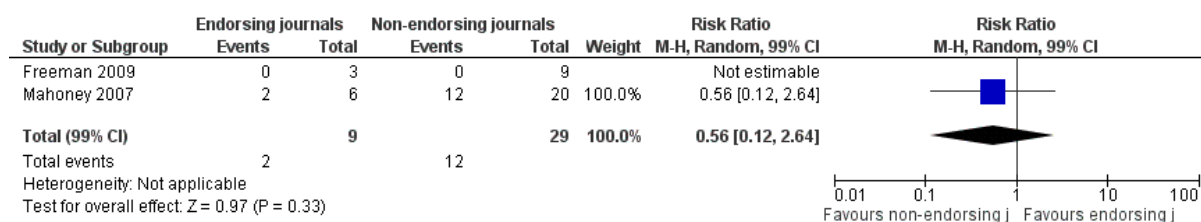

STARD – Results, Study dates & recruitment for endorsing compared with non-endorsing journals.

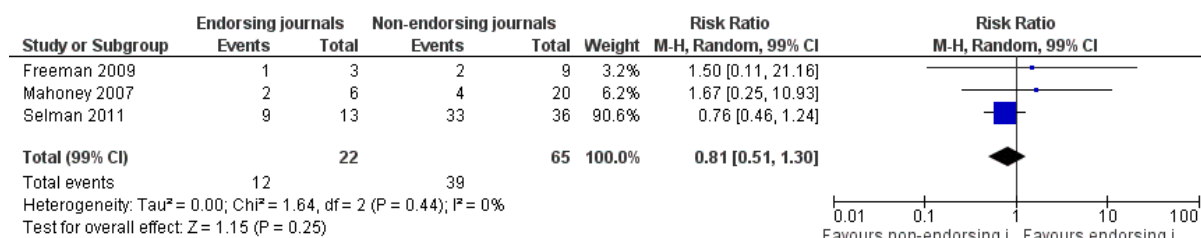

STARD – Results, Participant characteristics for endorsing compared with non-endorsing journals.

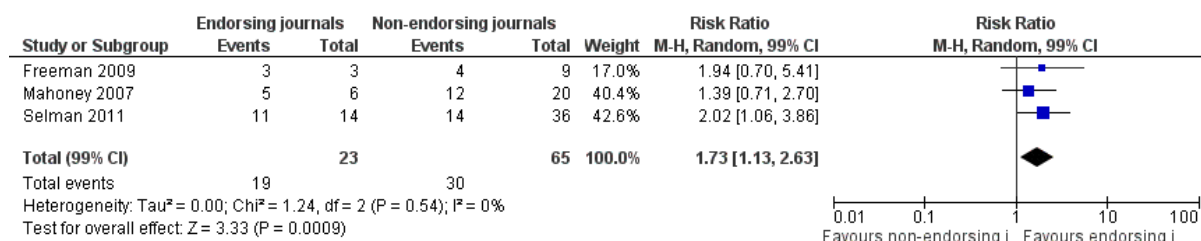

STARD – Participant flow for endorsing compared with non-endorsing journals.

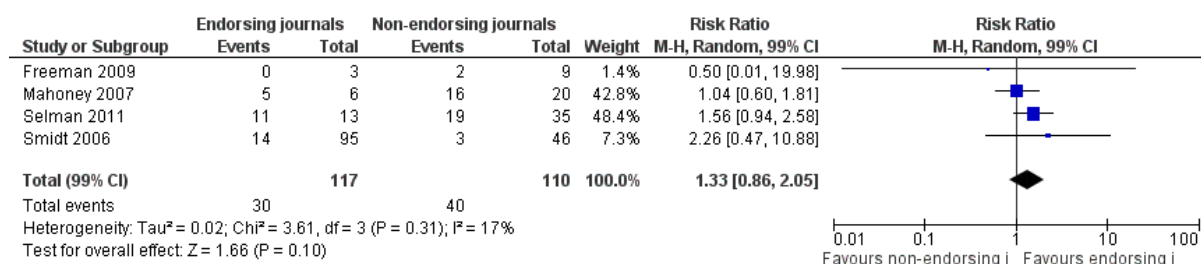

STARD – Results, Time interval for endorsing compared with non-endorsing journals.

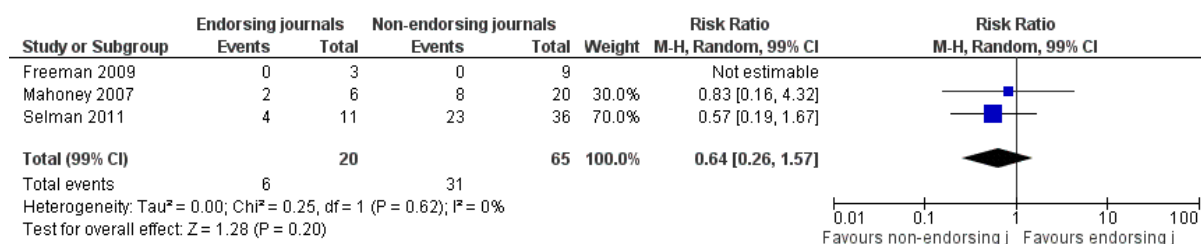

STARD – Results, Condition/Severity of disease for endorsing compared with non-endorsing journals.

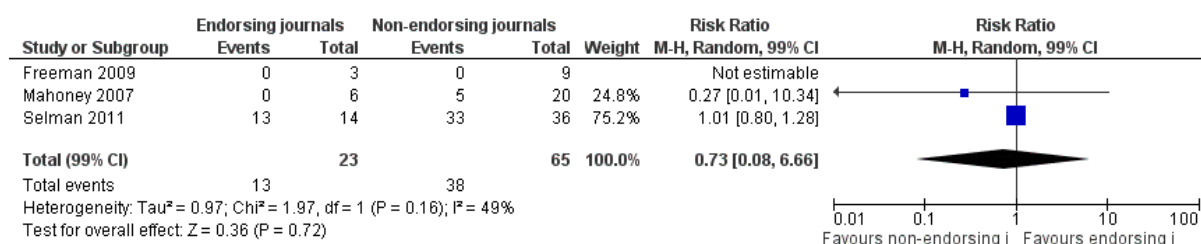

STARD – Results, Cross tabulation of results for endorsing compared with non-endorsing journals.

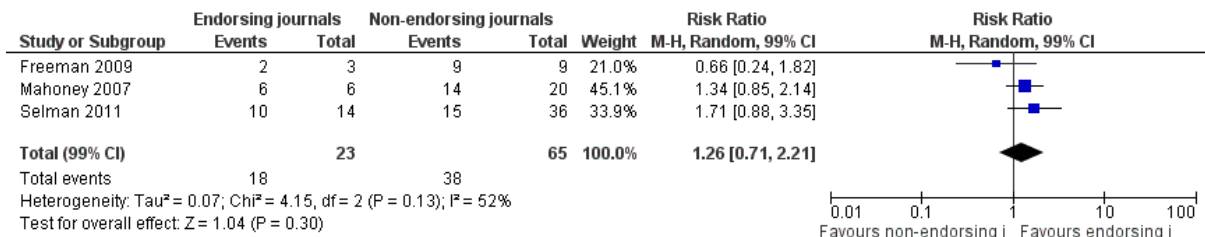

STARD – Results, Adverse events from test/standard for endorsing compared with non-endorsing journals.

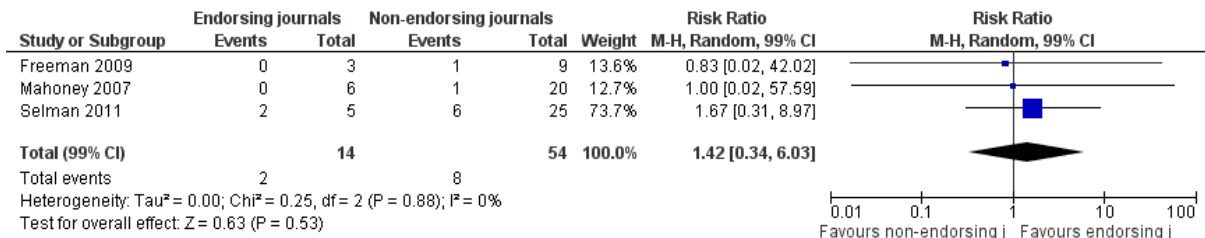

STARD – Results, Estimates of diagnostic accuracy for endorsing compared with non-endorsing journals.

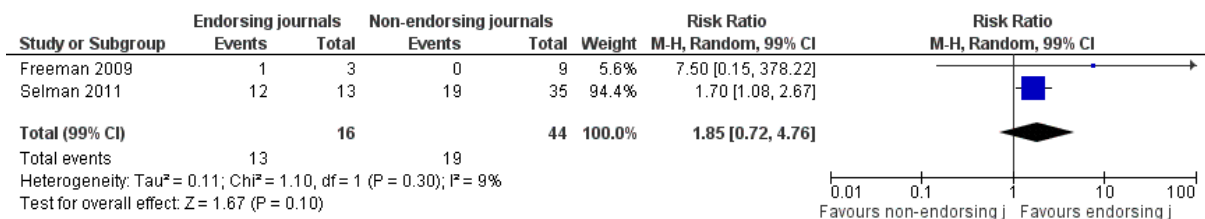

STARD – Results, Handing of indeterminate results, missing data, outliers for endorsing compared with non-endorsing journals.

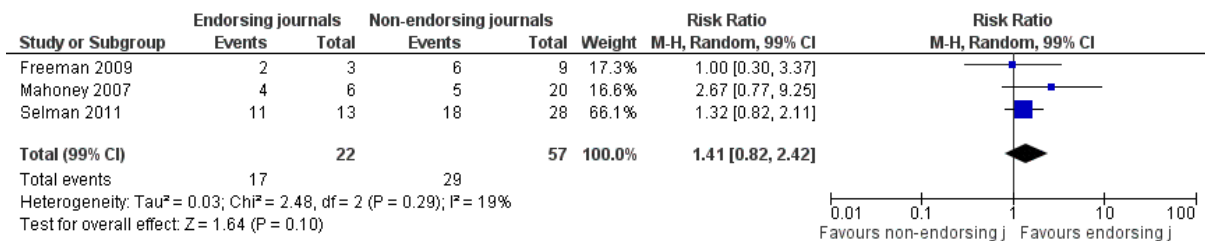

STARD – Results, Estimates of variability among subgroups for endorsing compared with non-endorsing journals.

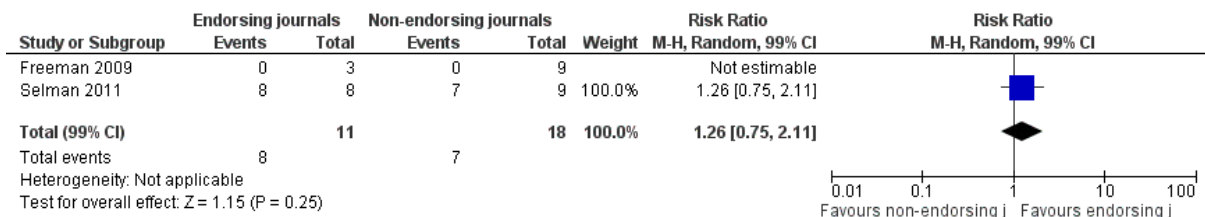

STARD – Results, Test reproducibility for endorsing compared with non-endorsing journals.

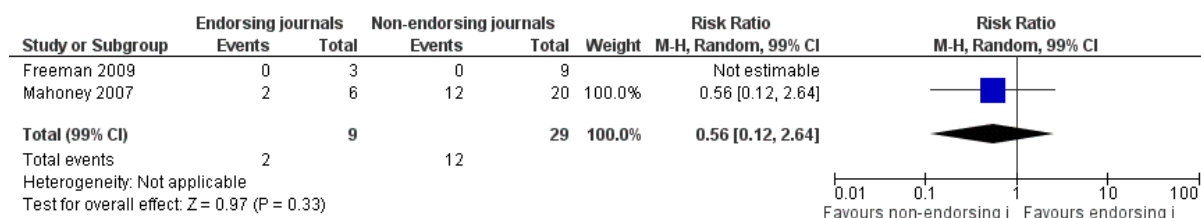

STARD – Discussion, Clinical Applicability for endorsing compared with non-endorsing journals.

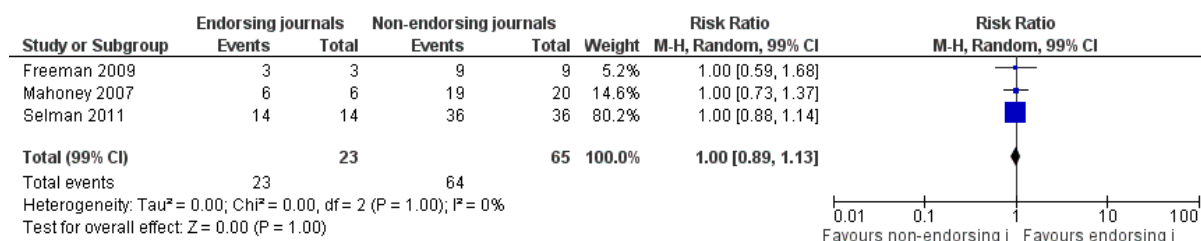

STARD – Mean summed score for endorsing compared with non-endorsing journals.

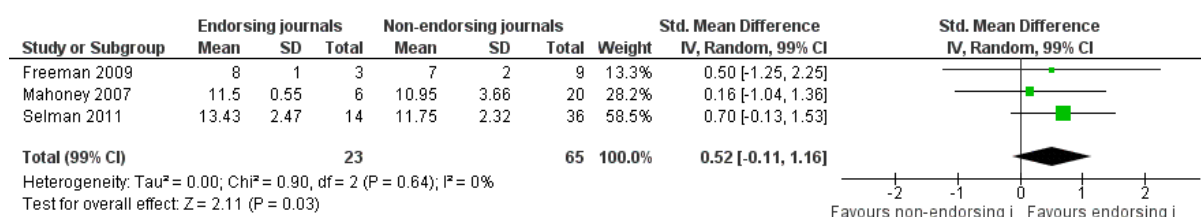

STRICTA – Style of acupuncture for endorsing compared with non-endorsing journals.

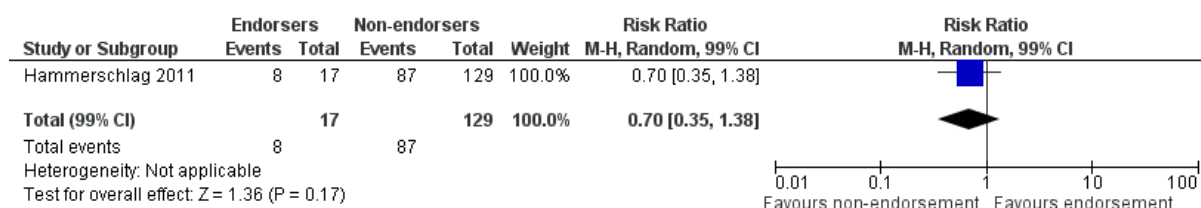

STRICTA – Rationale for treatment for endorsing compared with non-endorsing journals.

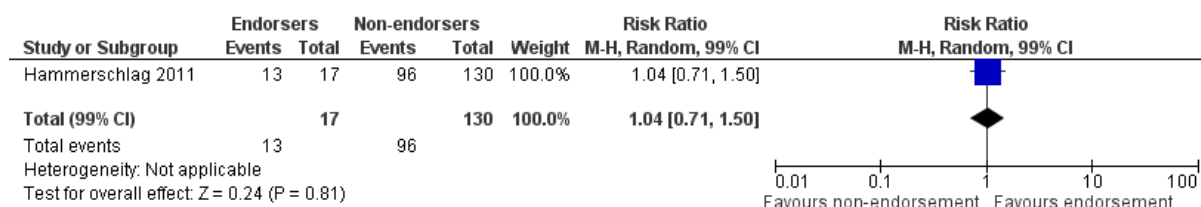

STRICTA – Sources to justify rationale for endorsing compared with non-endorsing journals.

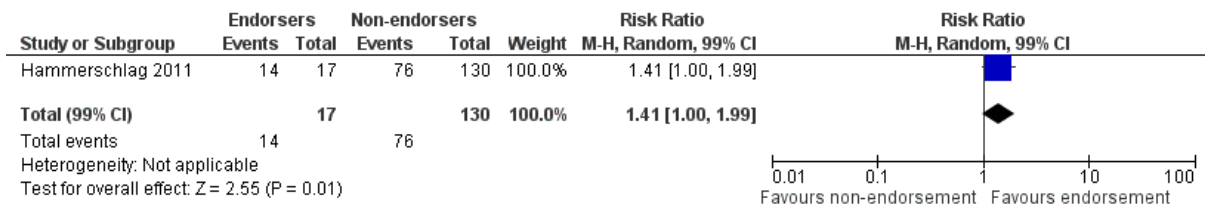

STRICTA – Uni/bilateral points used for endorsing compared with non-endorsing journals.

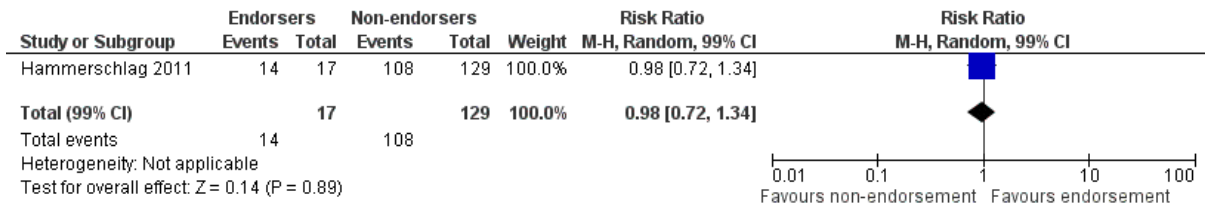

STRICTA – Number of needles inserted for endorsing compared with non-endorsing journals.

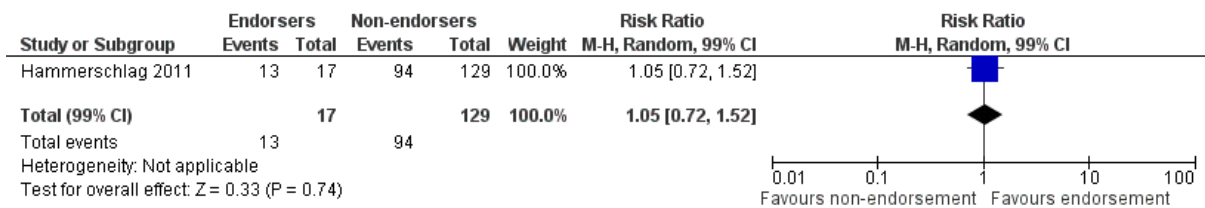

STRICTA – Depths of insertion for endorsing compared with non-endorsing journals.

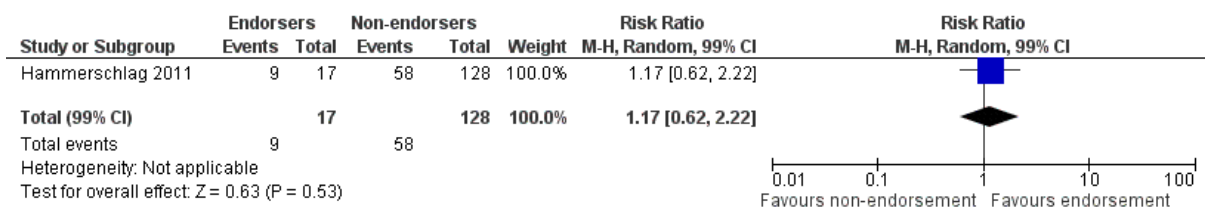

STRICTA – Responses elicited for endorsing compared with non-endorsing journals.

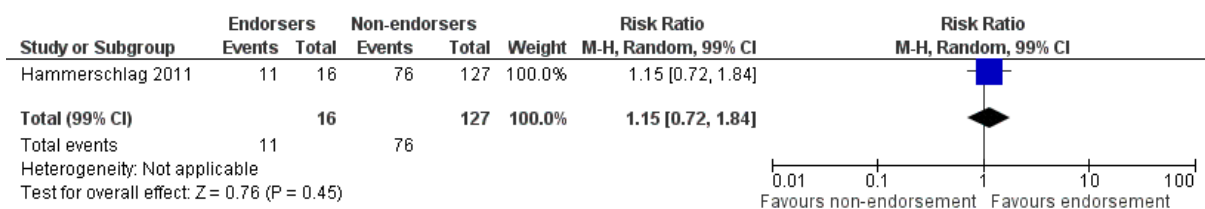

STRICTA – Needle stimulation for endorsing compared with non-endorsing journals.

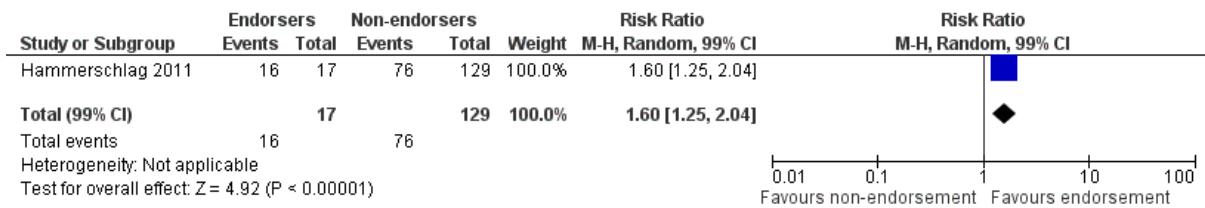

STRICTA – Needle retention time for endorsing compared with non-endorsing journals.

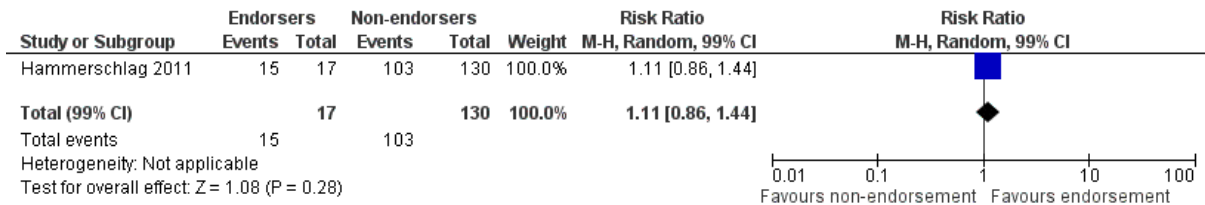

STRICTA – Needle type for endorsing compared with non-endorsing journals.

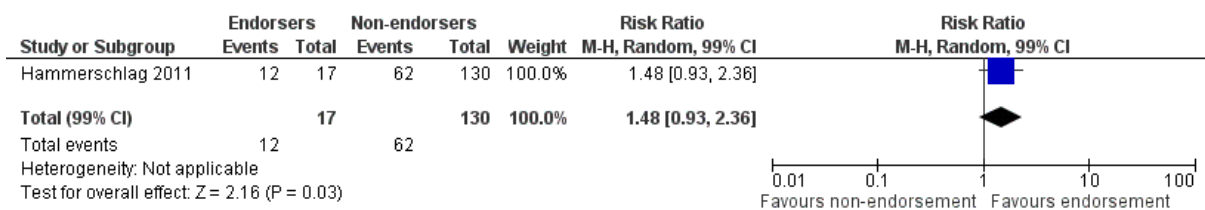

STRICTA – Number of treatment sessions for endorsing compared with non-endorsing journals.

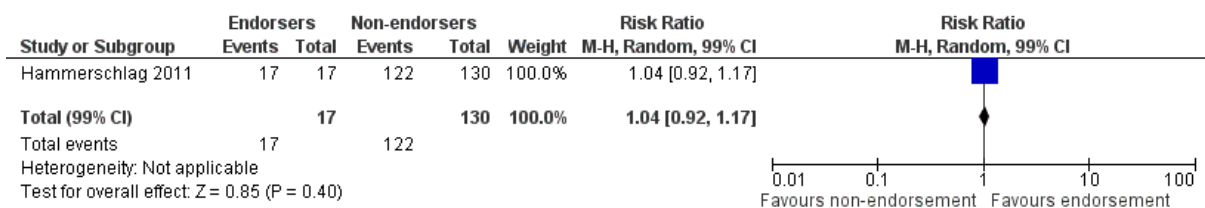

STRICTA – Frequency of treatment for endorsing compared with non-endorsing journals.

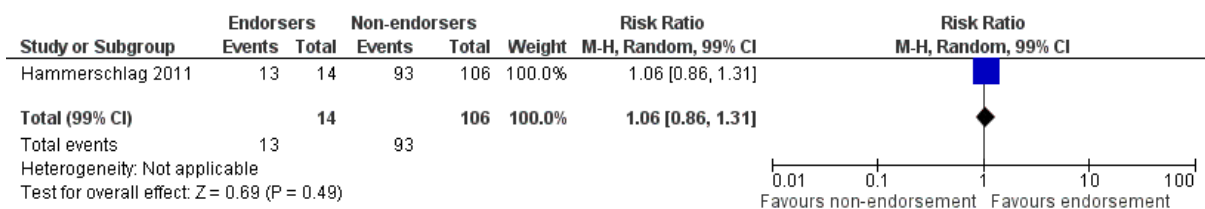

STRICTA – Other interventions for endorsing compared with non-endorsing journals.

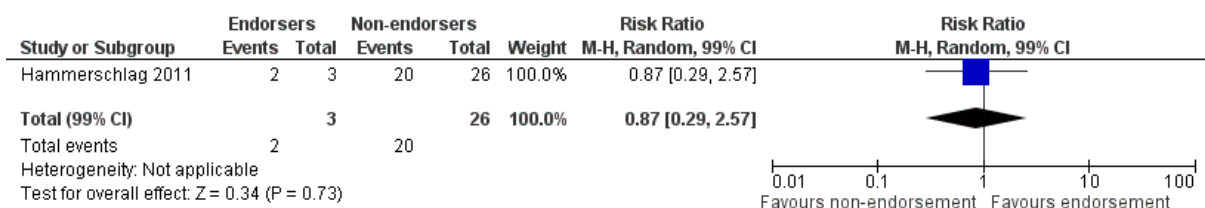



STRICTA – Duration of relevant training for endorsing compared with non-endorsing journals.

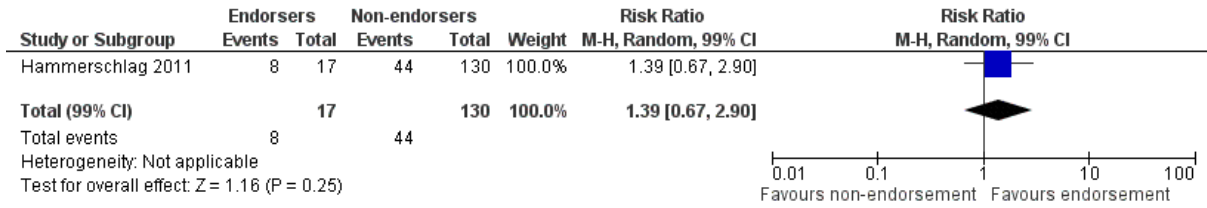

STRICTA – Length of clinical experience for endorsing compared with non-endorsing journals.

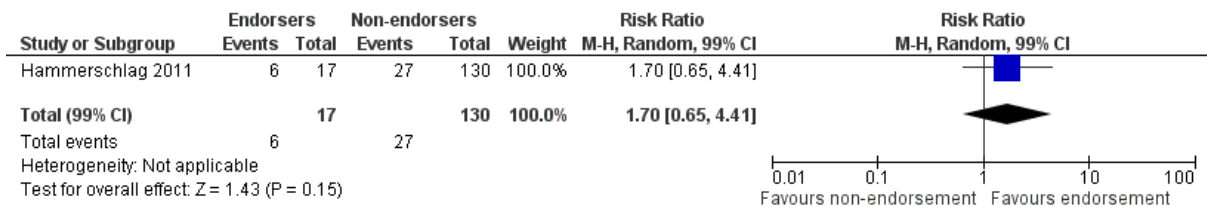

STRICTA – Expertise in condition for endorsing compared with non-endorsing journals.

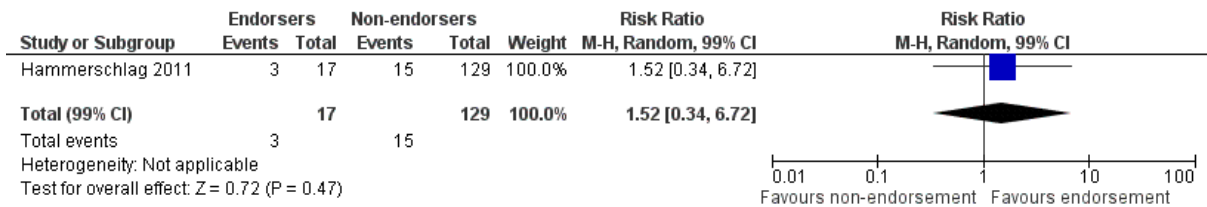

STRICTA – Sources that justify choice of control for endorsing compared with non-endorsing journals.

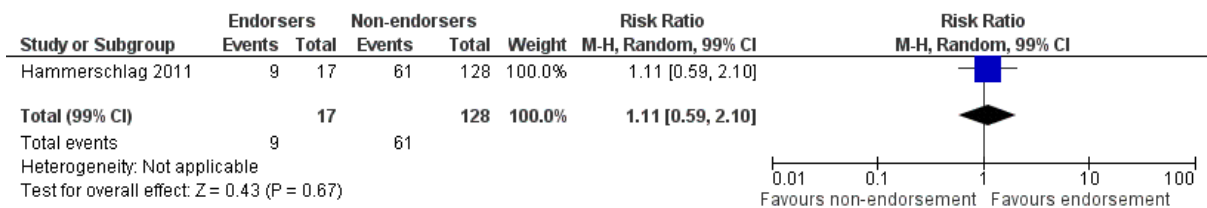

STRICTA – Explanations regarding treatment and control for endorsing compared with non-endorsing journals.

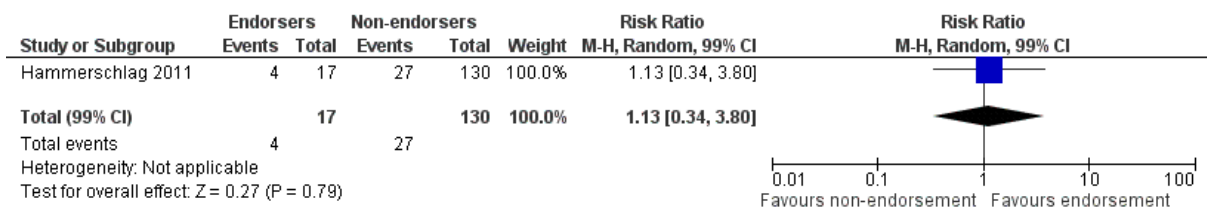

STRICTA – Mean summed score for endorsing compared with non-endorsing journals.

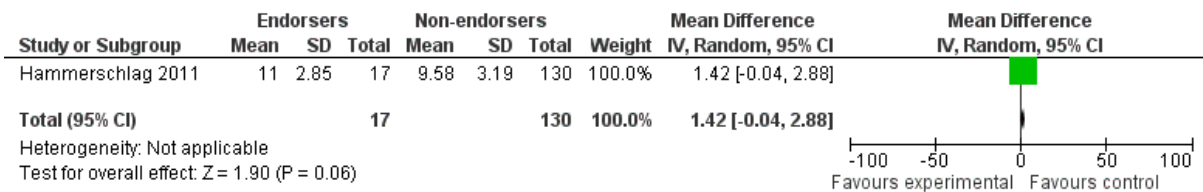

STROBE – Title/abstract for endorsing compared with non-endorsing journals.

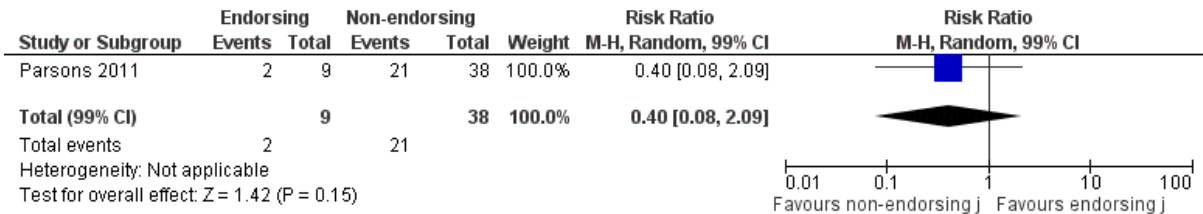

STROBE – Abstract for endorsing compared with non-endorsing journals.

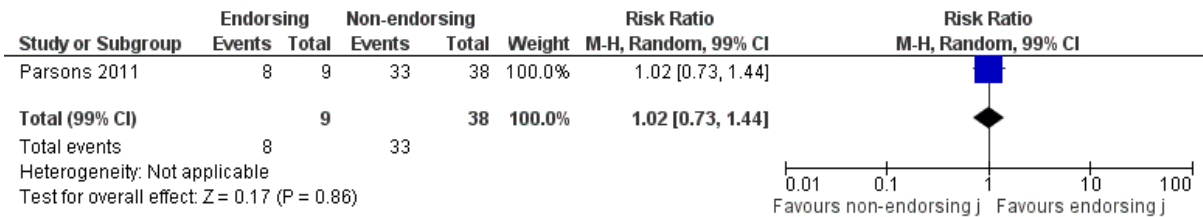

STROBE – Introduction, Background & rationale for endorsing compared with non-endorsing journals.

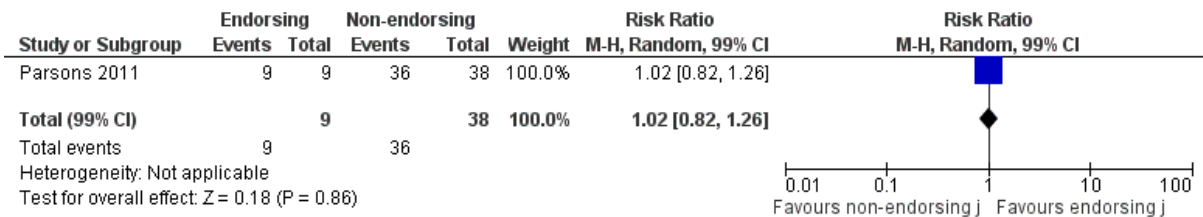

STROBE – Introduction, Objectives for endorsing compared with non-endorsing journals.

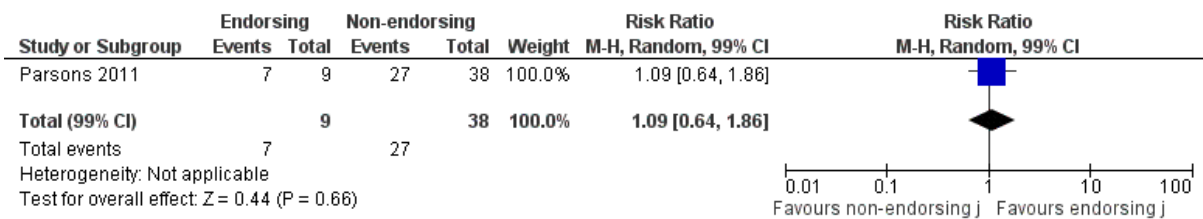

STROBE – Introduction, Study design for endorsing compared with non-endorsing journals.

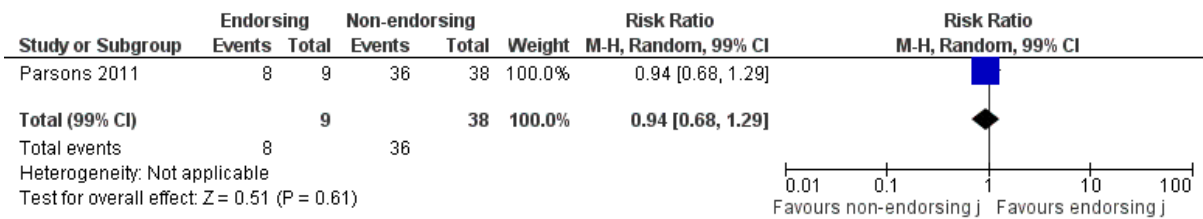

STROBE – Methods, Setting/Locations/Dates for endorsing compared with non-endorsing journals.

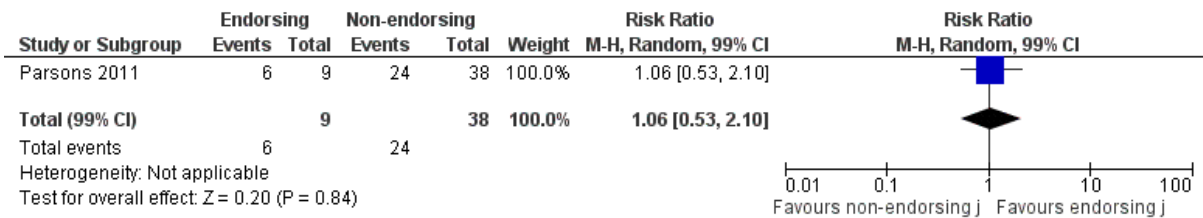

STROBE – Methods, Eligibility for endorsing compared with non-endorsing journals.

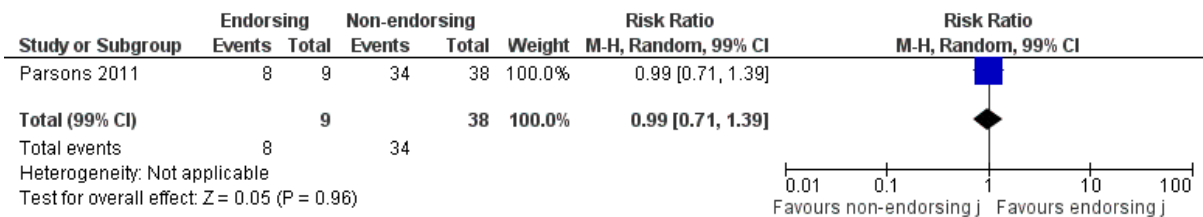

STROBE – Participant matching for endorsing compared with non-endorsing journals.

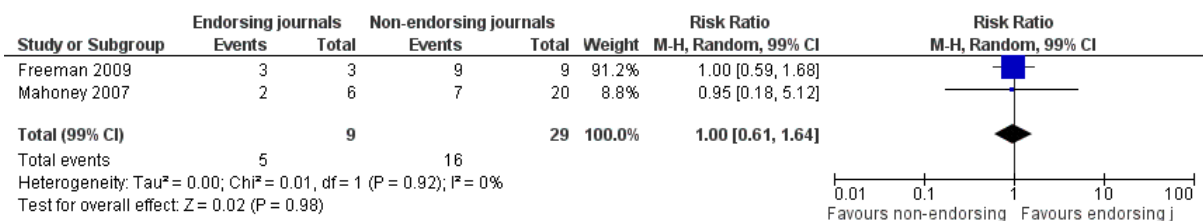

STROBE – Methods, Outcome/exposure/variables for endorsing compared with non-endorsing journals.

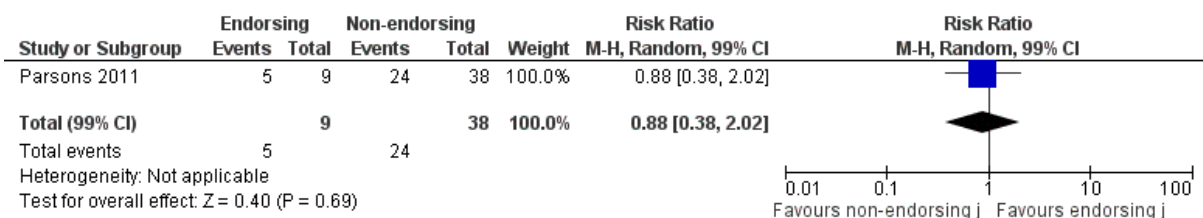

STROBE – Methods, Data sources & measurement for endorsing compared with non-endorsing journals.

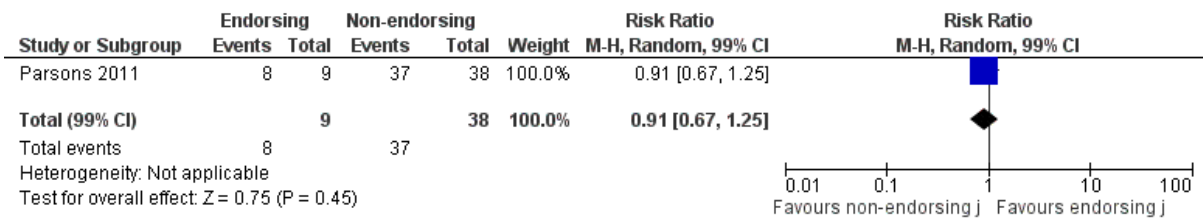

STROBE – Methods, Bias for endorsing compared with non-endorsing journals.

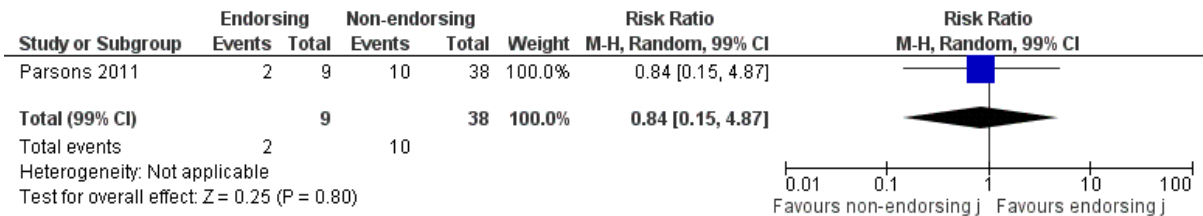

STROBE – Methods, Study size for endorsing compared with non-endorsing journals.

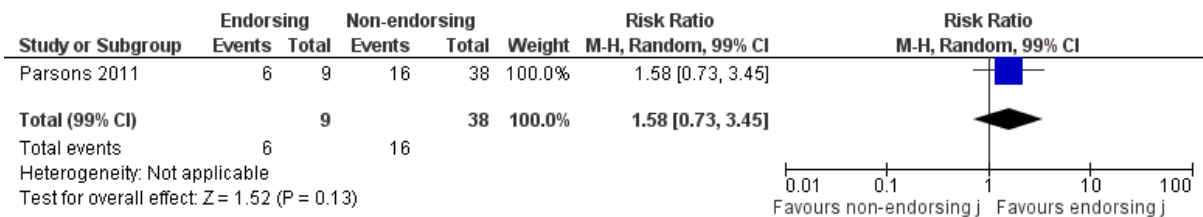

STROBE – Methods, Handling variables for endorsing compared with non-endorsing journals.

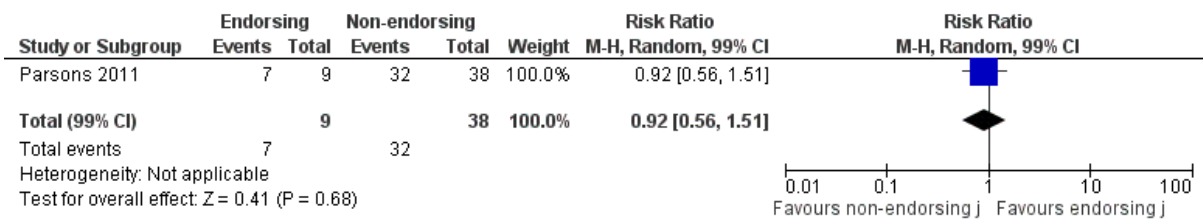

STROBE – Methods, Statistics for endorsing compared with non-endorsing journals.

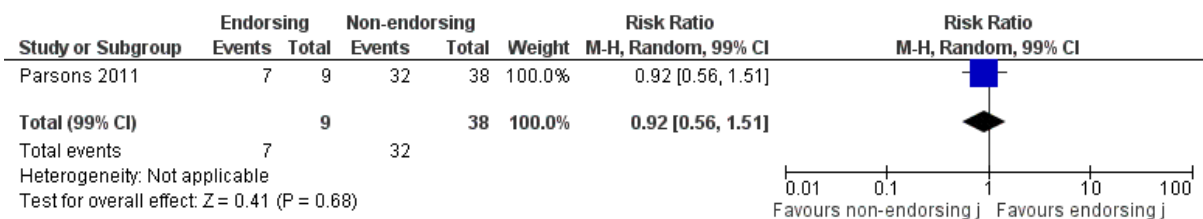

STROBE – Methods, Subgroups/interactions for endorsing compared with non-endorsing journals.

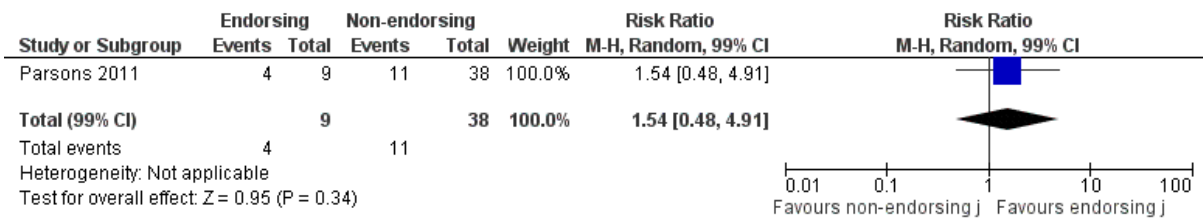

STROBE – Methods, Missing data for endorsing compared with non-endorsing journals.

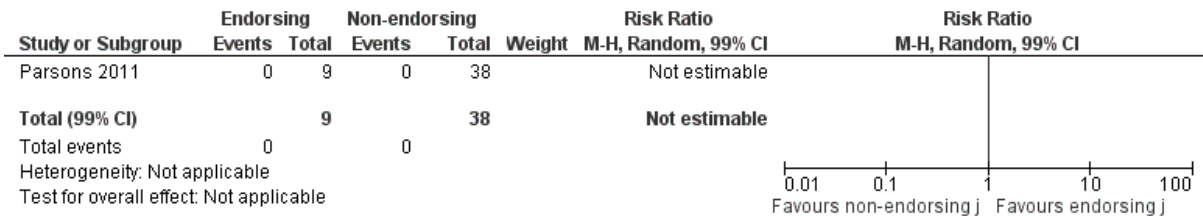

STROBE – Methods, Loss to follow-up/case matching/sampling methods for endorsing compared with non-endorsing journals.

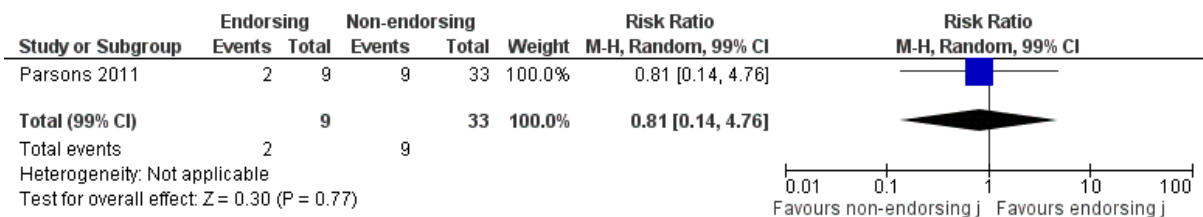

STROBE – Methods, Sensitivity analyses for endorsing compared with non-endorsing journals.

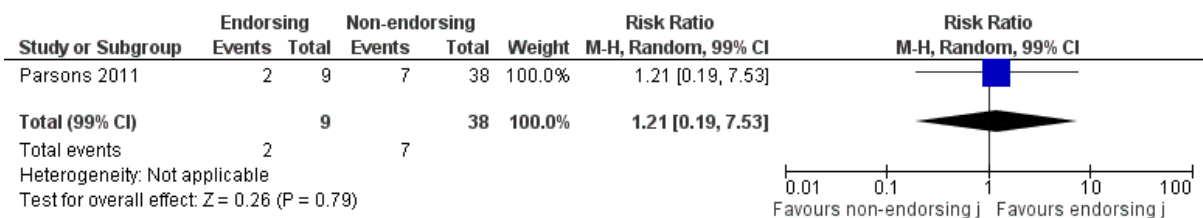

STROBE – Results, Participant flow for endorsing compared with non-endorsing journals.

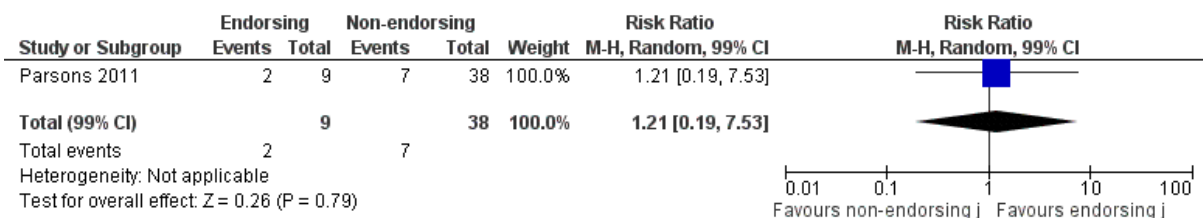

STROBE – Results, Reasons for nonparticipation for endorsing compared with non-endorsing journals.

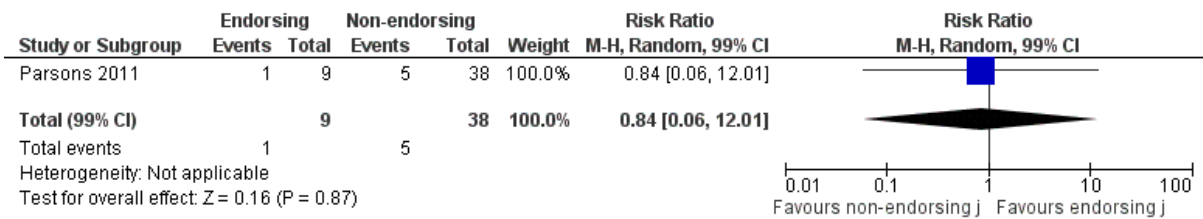

STROBE – Results, Flow diagram for endorsing compared with non-endorsing journals.

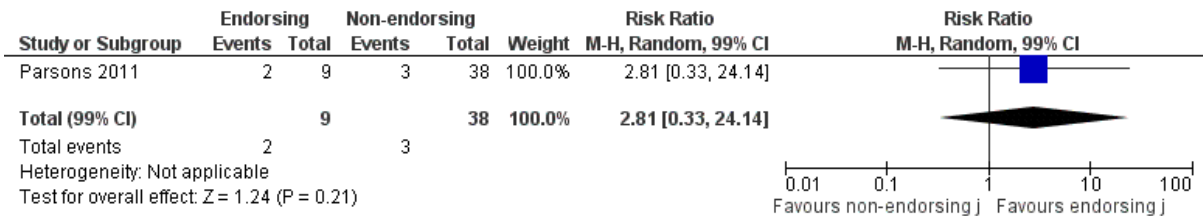

STROBE – Results, Participant characteristics for endorsing compared with non-endorsing journals.

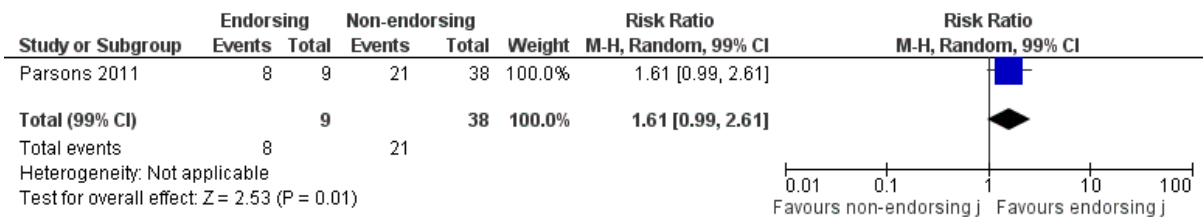

STROBE – Results, Participants with missing data for endorsing compared with non-endorsing journals.

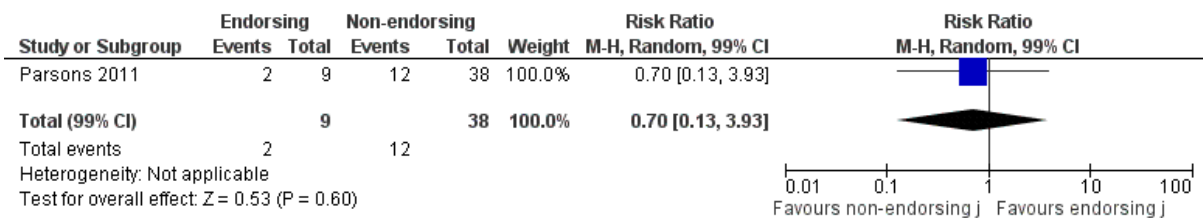

STROBE – Results, Follow-up time (cohort) for endorsing compared with non-endorsing journals.

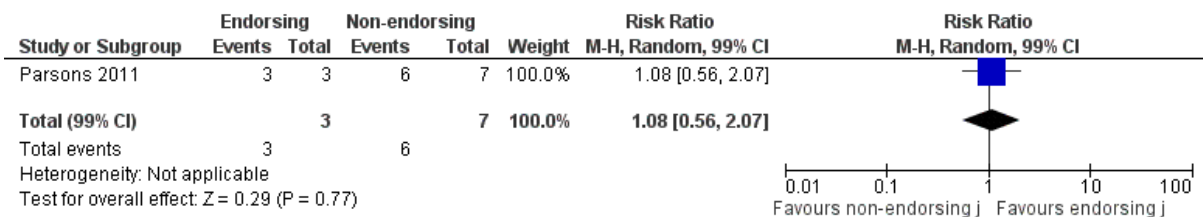

STROBE – Results, Outcomes data for endorsing compared with non-endorsing journals.

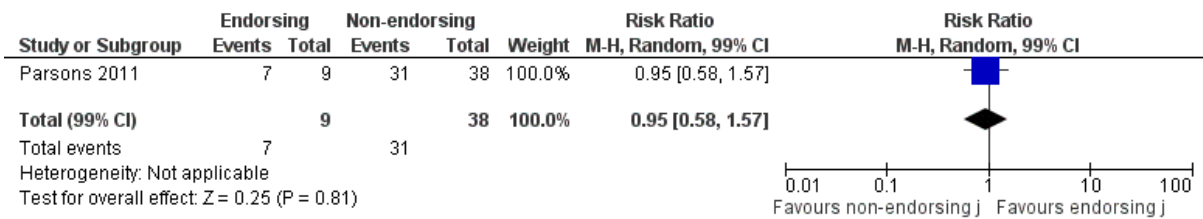

STROBE – Results, Estimates of effect/precision for endorsing compared with non-endorsing journals.

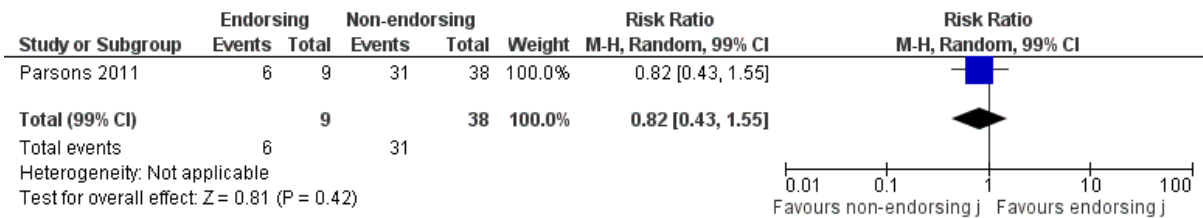

STROBE – Results, Boundaries for continuous variable categories for endorsing compared with non-endorsing journals.

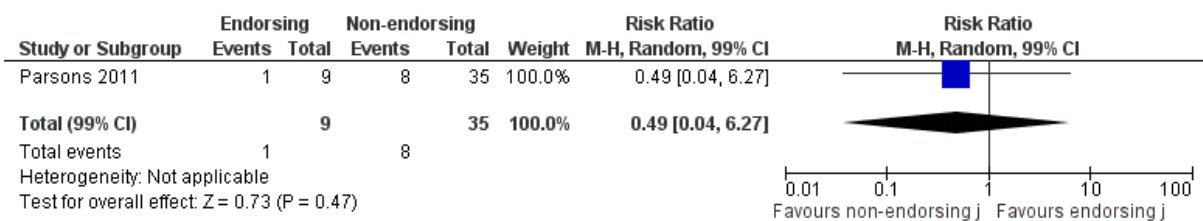

STROBE – Results, Relative to absolute risks for endorsing compared with non-endorsing journals.

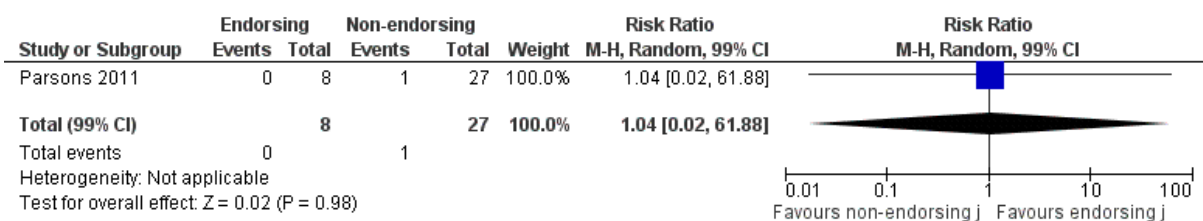

STROBE – Results, Other analyses for endorsing compared with non-endorsing journals.

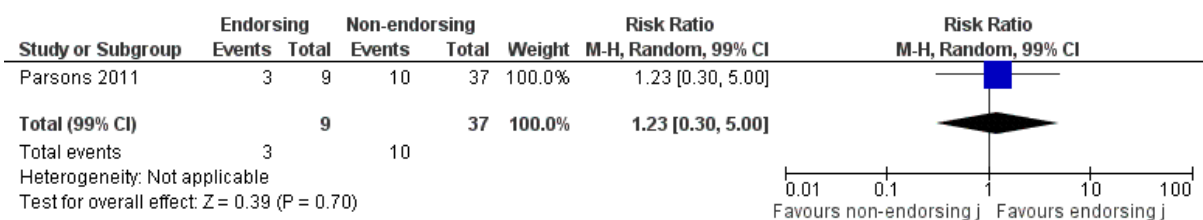

STROBE – Discussion, Key results summarized for endorsing compared with non-endorsing journals.

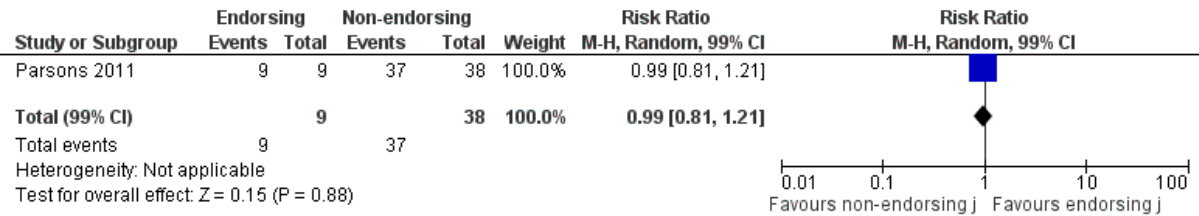

### STROBE – Discussion, Limitations for endorsing compared with non-endorsing journals.

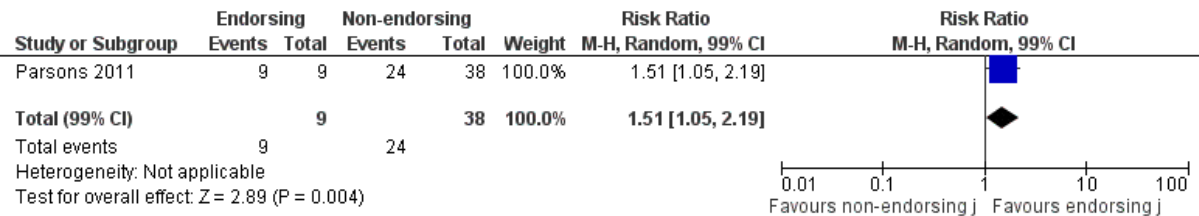

### STROBE – Discussion, Interpretation for endorsing compared with non-endorsing journals.

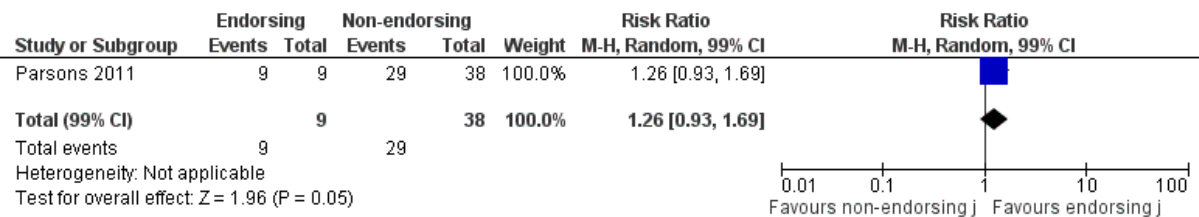

### STROBE – Discussion, Generalizability for endorsing compared with non-endorsing journals.

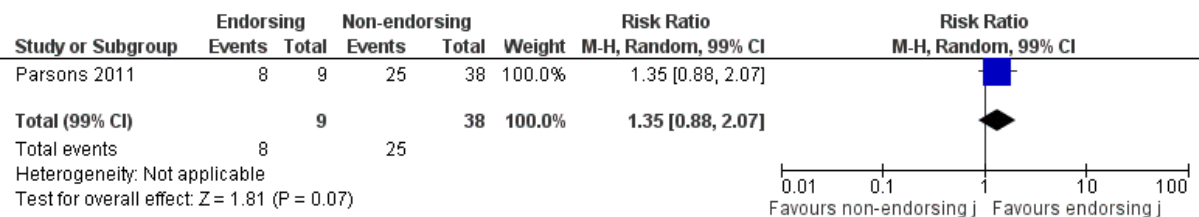

### STROBE – Other, Funding for endorsing compared with non-endorsing journals.

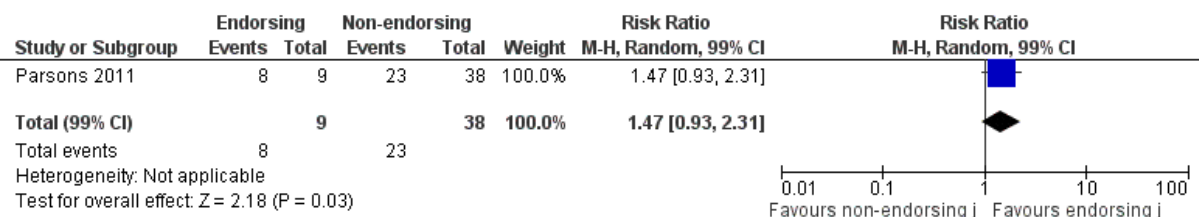

### STROBE – Mean summed score for endorsing compared with non-endorsing journals.

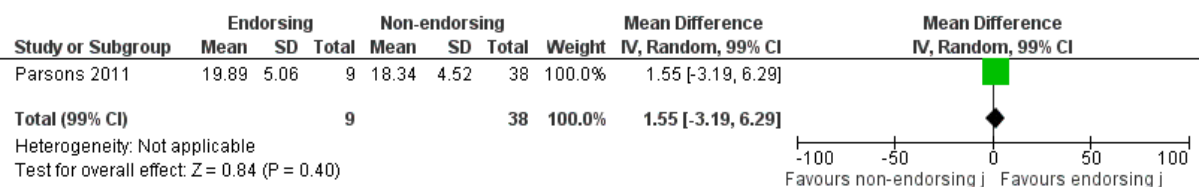



PRISMA – Title for after compared with before endorsement.

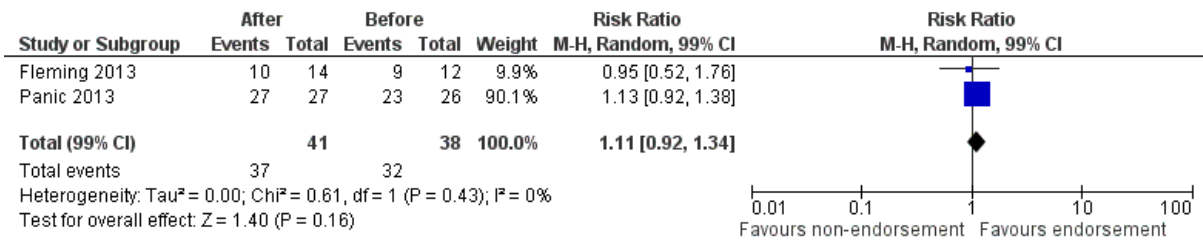

PRISMA – Structured summary for after compared with before endorsement.

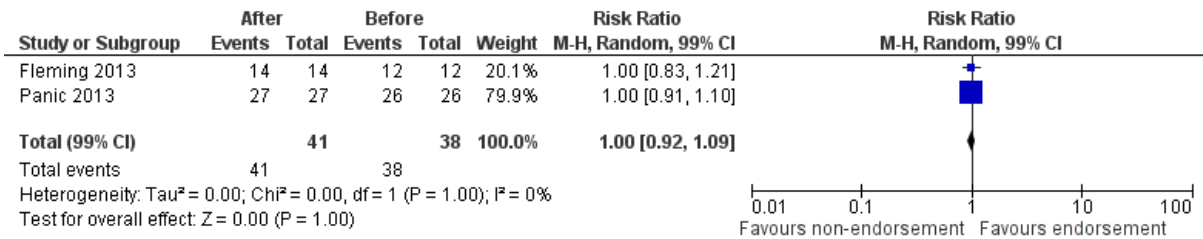

PRISMA – Rationale for after compared with before endorsement.

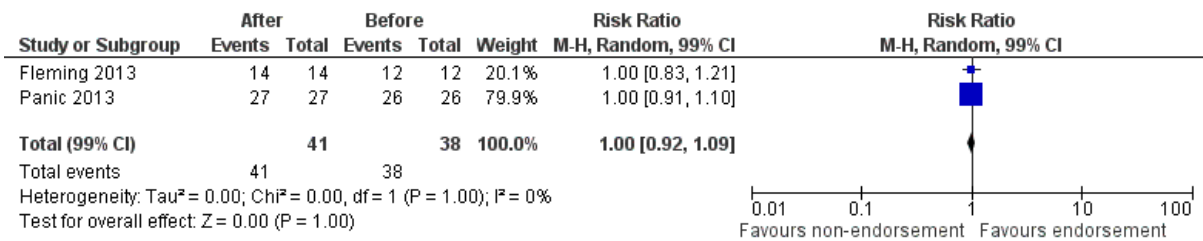

PRISMA – Objectives for after compared with before endorsement.

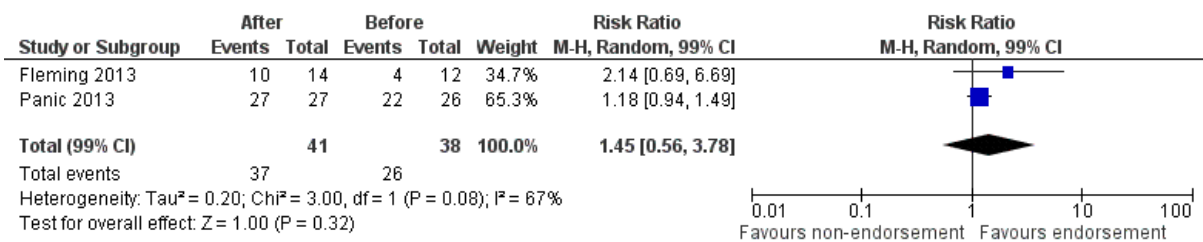

PRISMA – Methods, Protocol and registration for after compared with before endorsement.

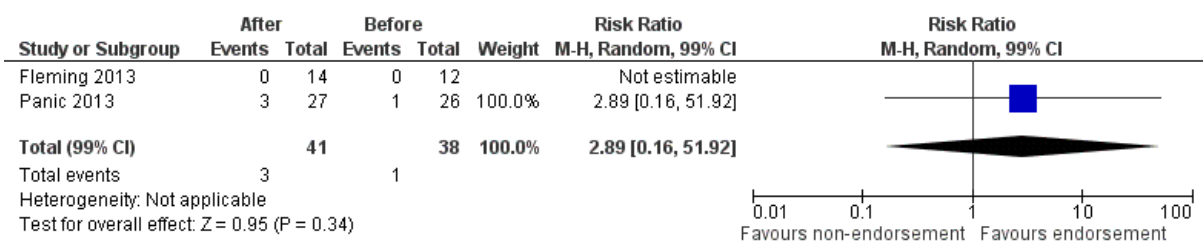

PRISMA – Methods, Eligibility criteria for after compared with before endorsement.

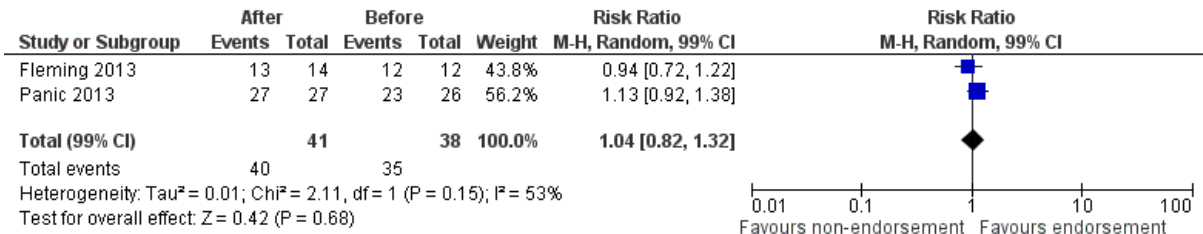

PRISMA – Methods, Information sources for after compared with before endorsement.

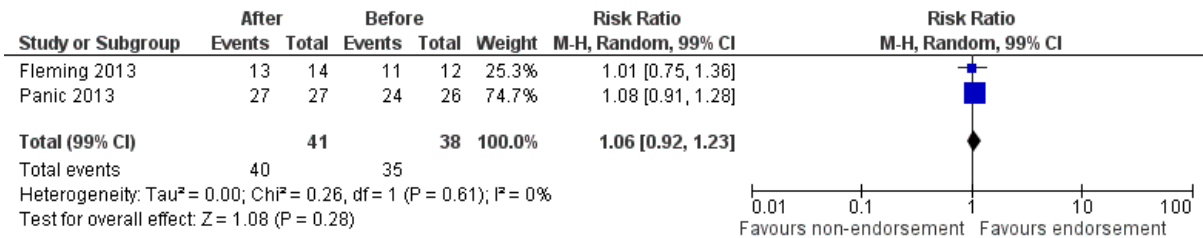

PRISMA – Methods, Search for after compared with before endorsement.

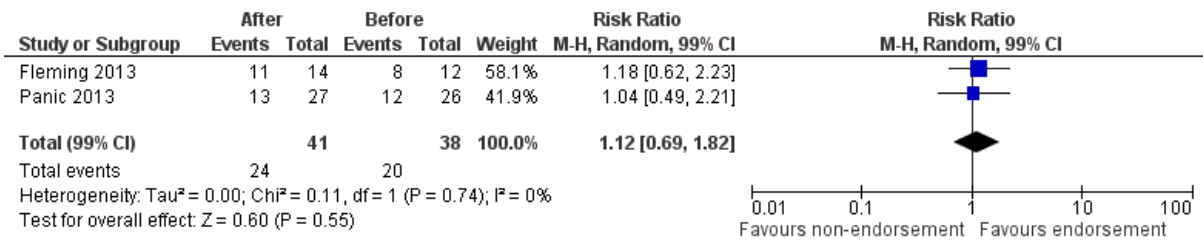

PRISMA – Methods, Study selection for after compared with before endorsement.

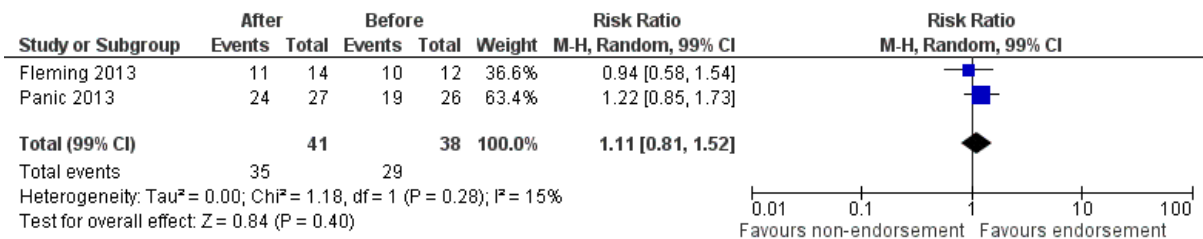

PRISMA – Methods, Data collection process for after compared with before endorsement.

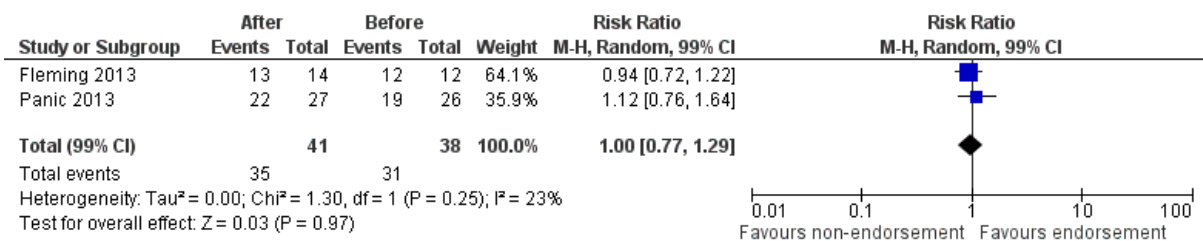

PRISMA – Methods, Data items for after compared with before endorsement.

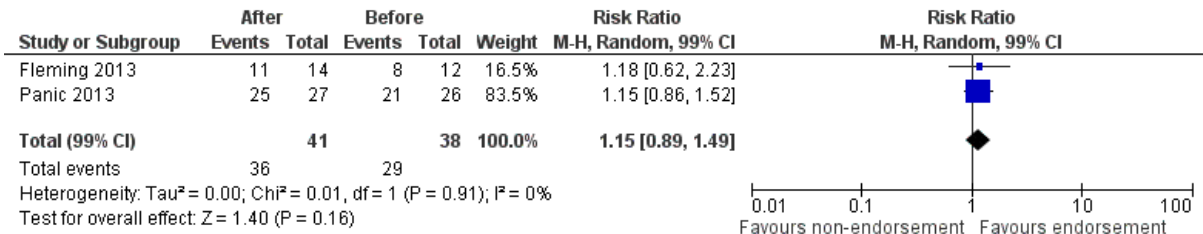

PRISMA – Methods, Risk of bias, individual studies for after compared with before endorsement.

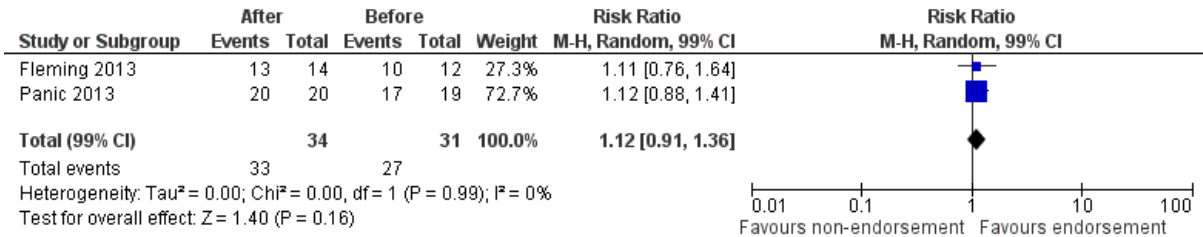

PRISMA – Methods, Summary measures for after compared with before endorsement.

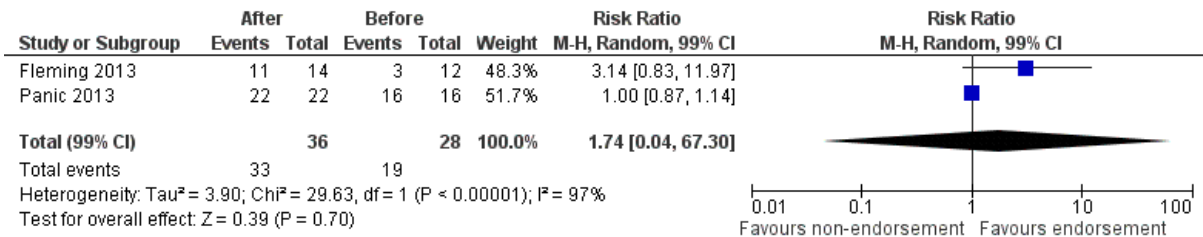

PRISMA – Methods, Synthesis of Results for after compared with before endorsement.

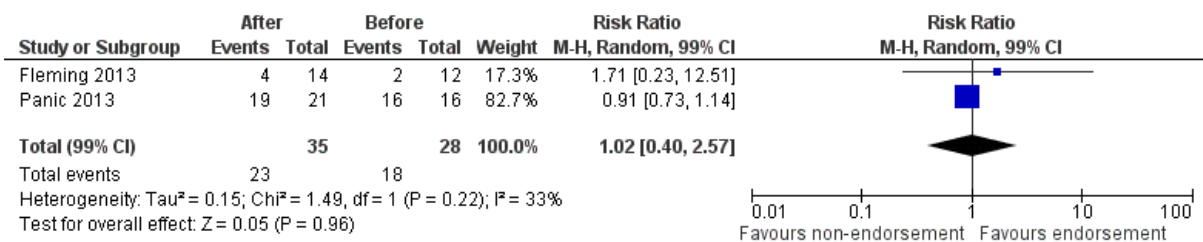

PRISMA – Methods, Risk of bias across studies for after compared with before endorsement.

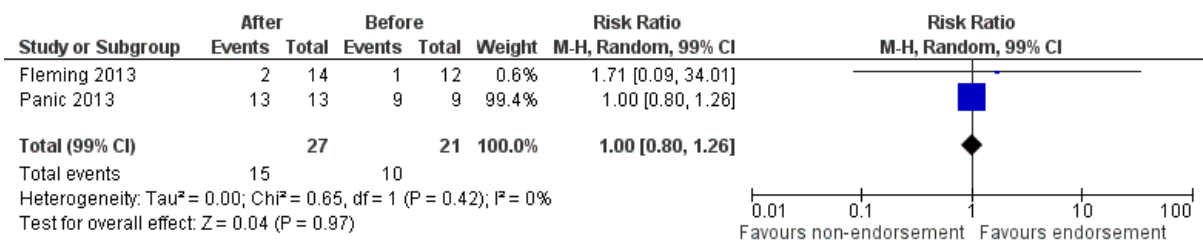

PRISMA – Methods, Additional analyses for after compared with before endorsement.

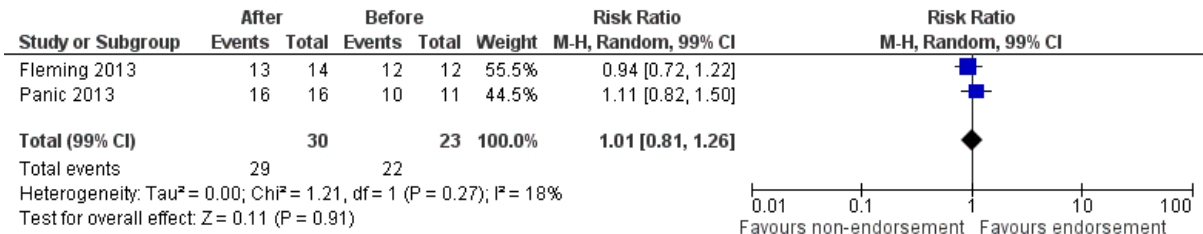

PRISMA – Results, Study selection for after compared with before endorsement.

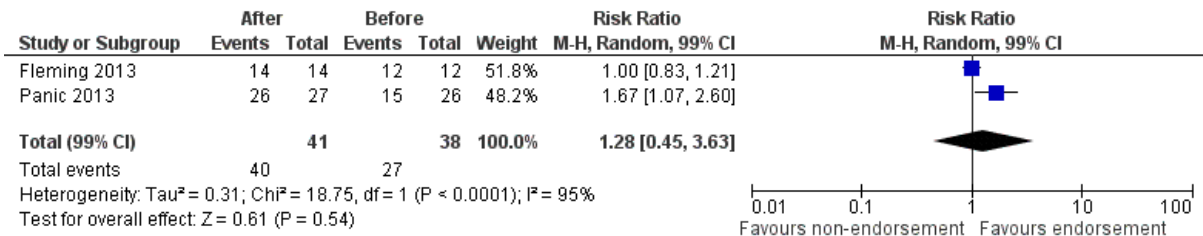

PRISMA – Results, Study characteristics for after compared with before endorsement.

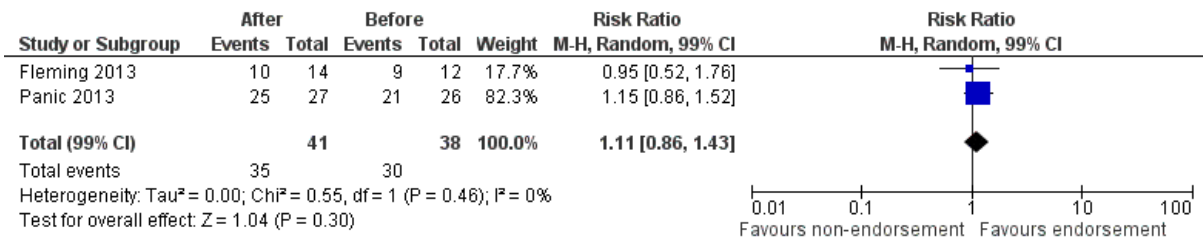

PRISMA – Results, Risk of bias within studies for after compared with before endorsement.

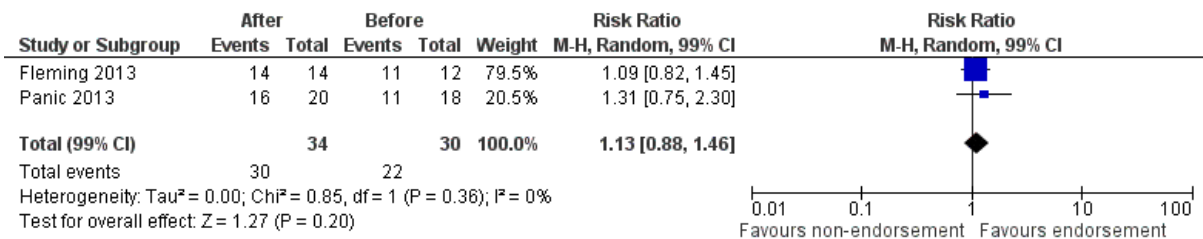

PRISMA – Results, Individual study results for after compared with before endorsement.

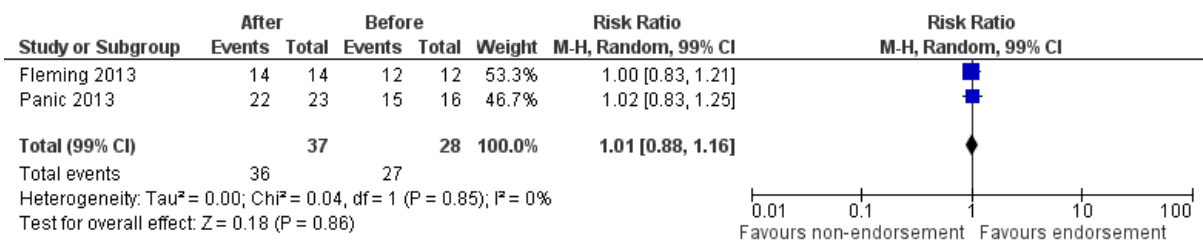

PRISMA – Results, Synthesis of Results for after compared with before endorsement.

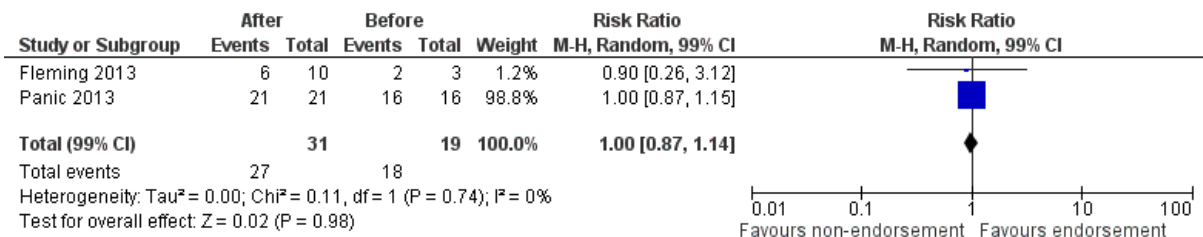

PRISMA – Results, Risk of bias across studies for after compared with before endorsement.

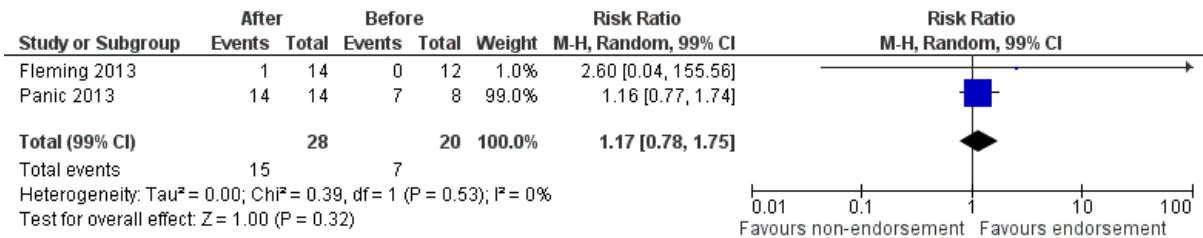

PRISMA – Results, Additional analyses for after compared with before endorsement.

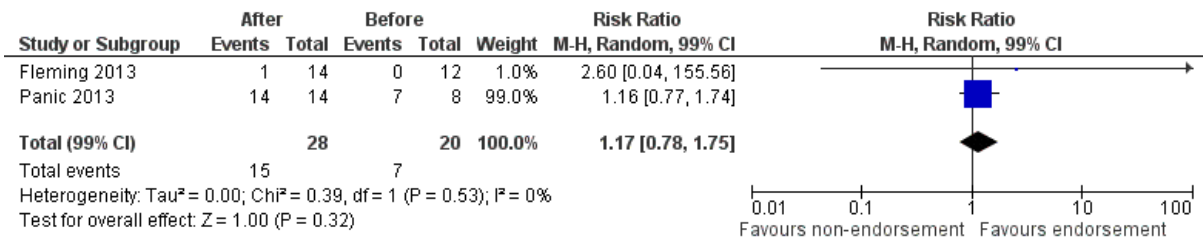

PRISMA – Discussion, Summary of Evidence for after compared with before endorsement.

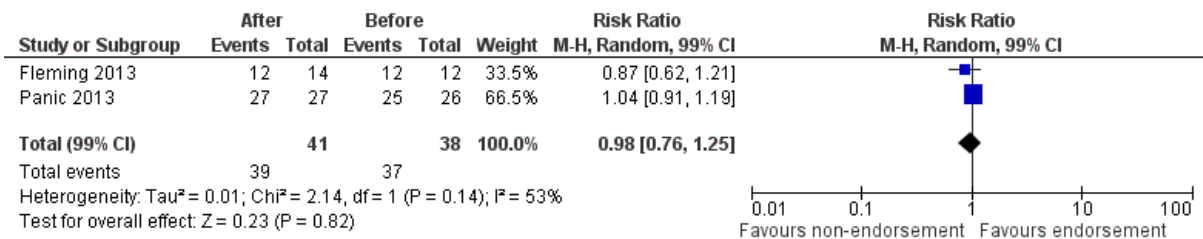

PRISMA – Discussion, Limitations for after compared with before endorsement.

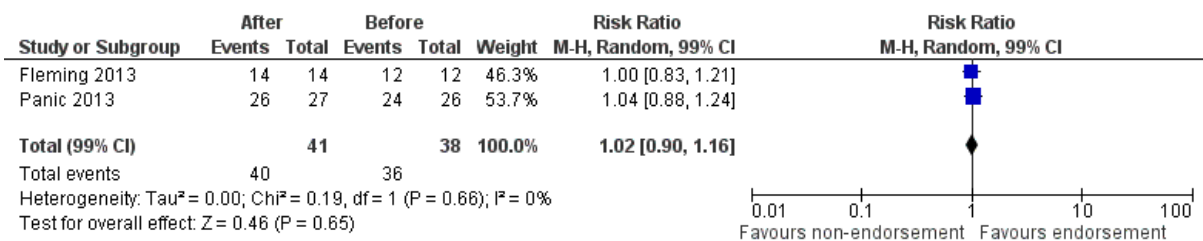

PRISMA – Discussion, Conclusions for after compared with before endorsement.

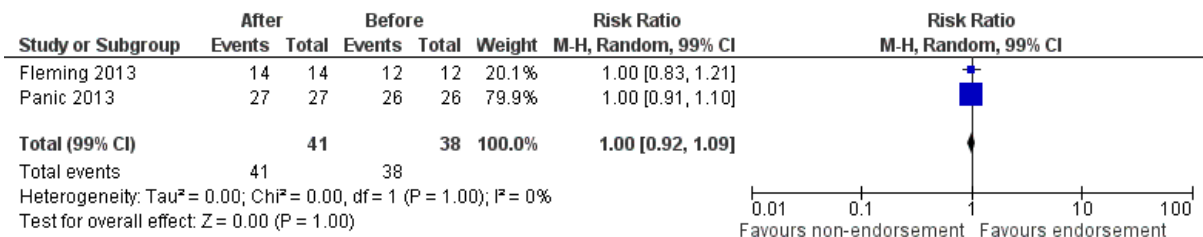

PRISMA – Funding for after compared with before endorsement.

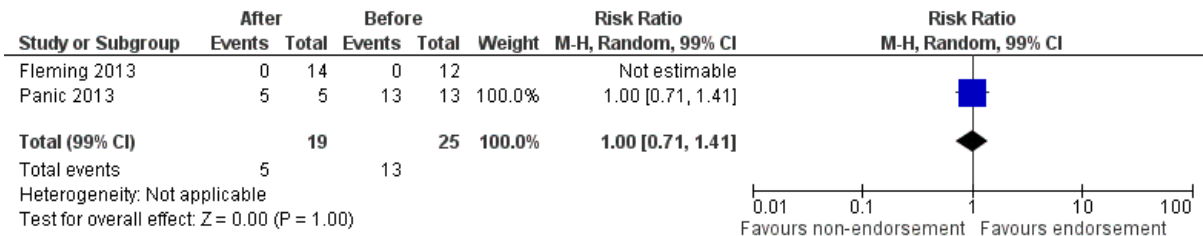

PRISMA – Mean summed score for after compared with before endorsement.

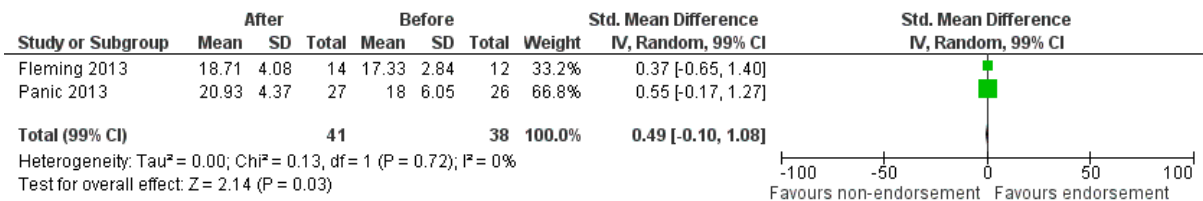

QUOROM – Flow diagram for after compared with before endorsement.

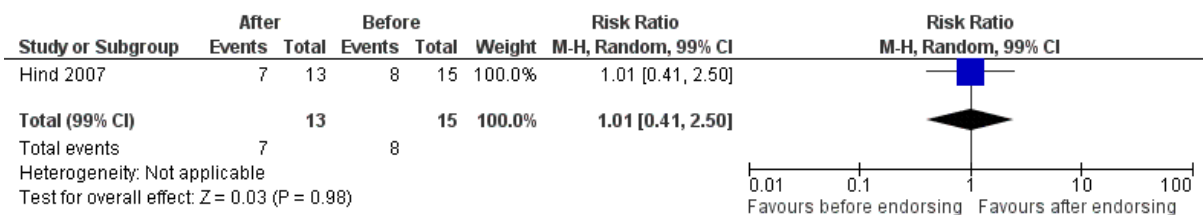

STARD – Flow diagram for after compared with before endorsement.

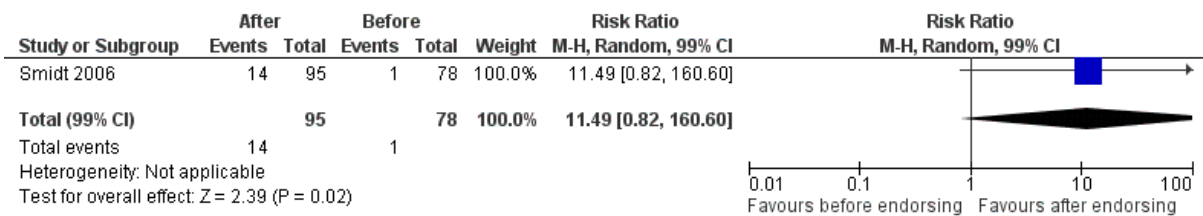

STRICTA – Style of acupuncture for after compared with before endorsement.

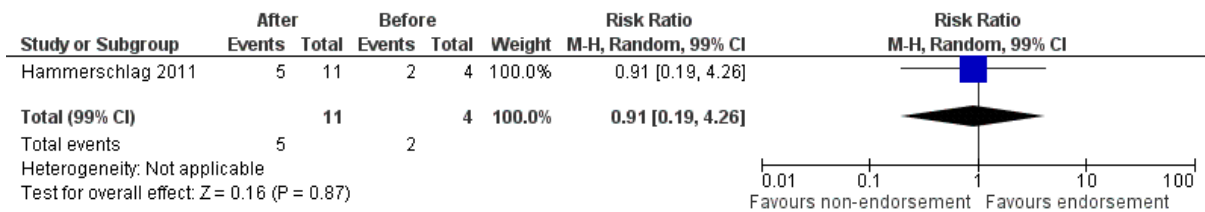

STRICTA – Rationale for after compared with before endorsement.

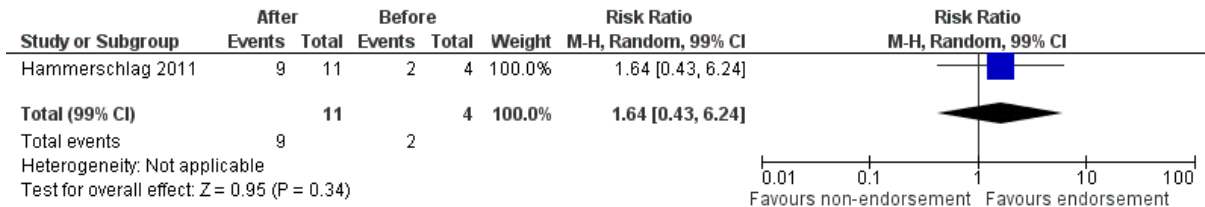

STRICTA – Sources for rationale for after compared with before endorsement.

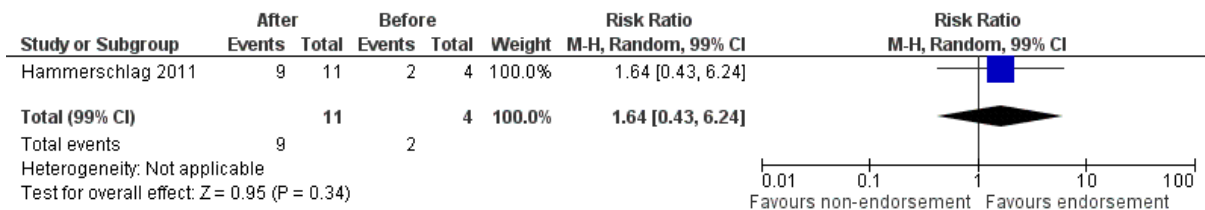

STRICTA – Points used for after compared with before endorsement.

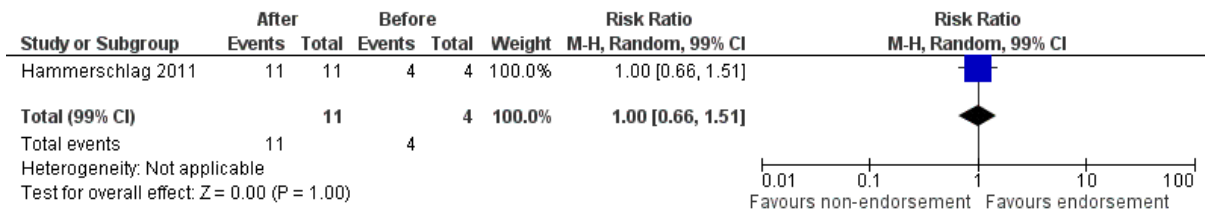

STRICTA – Number of needles inserted for after compared with before endorsement.

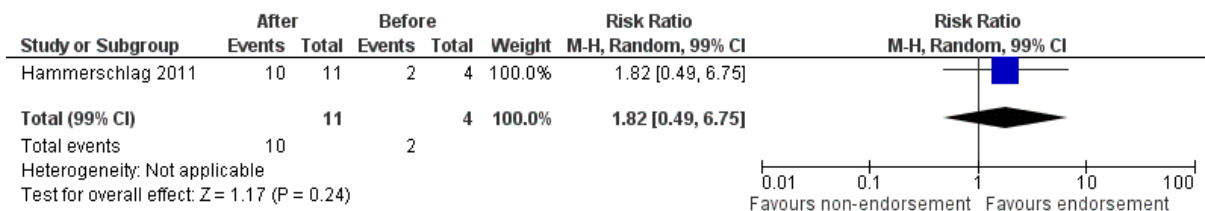

STRICTA – Depths of insertion for after compared with before endorsement.

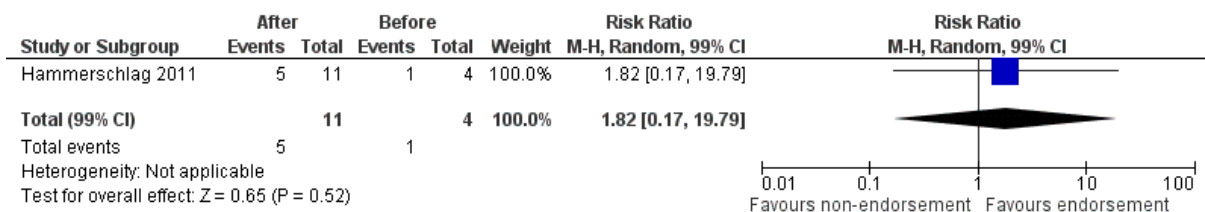



STRICTA – Responses elicited for after compared with before endorsement.

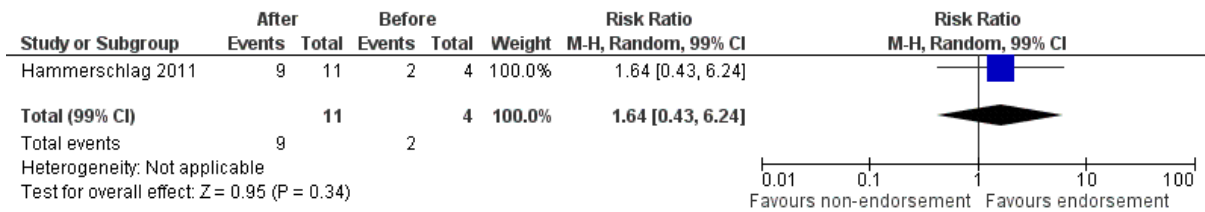

STRICTA – Needle stimulation for after compared with before endorsement.

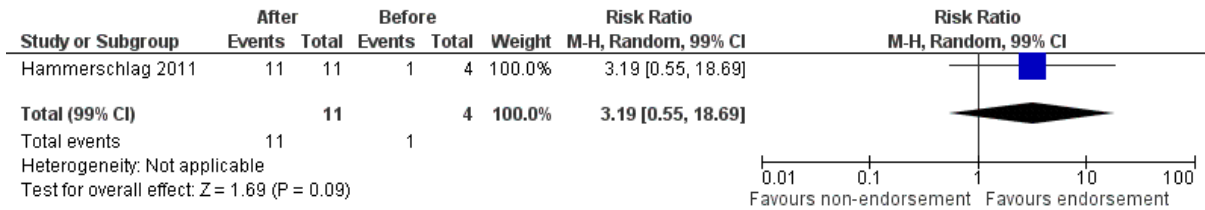

STRICTA – Needle retention time for after compared with before endorsement.

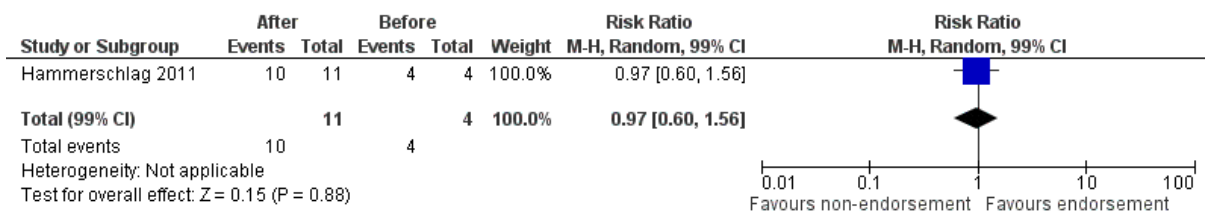

STRICTA – Needle type for after compared with before endorsement.

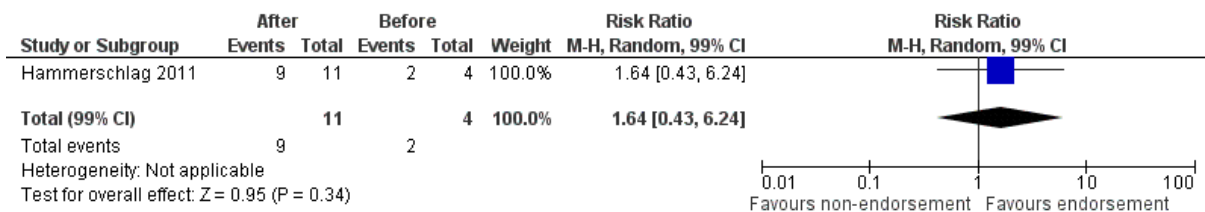

STRICTA – Number of treatment sessions for after compared with before endorsement.

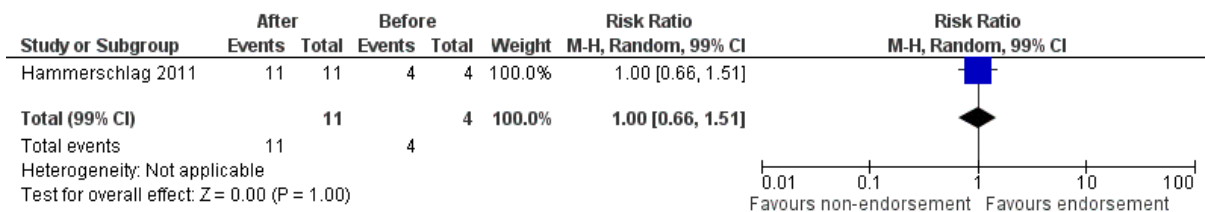

STRICTA – Frequency of treatment for after compared with before endorsement.



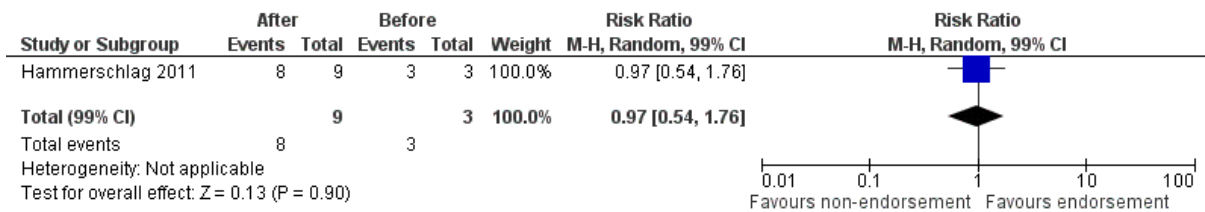

STRICTA – Duration of relevant training for after compared with before endorsement.

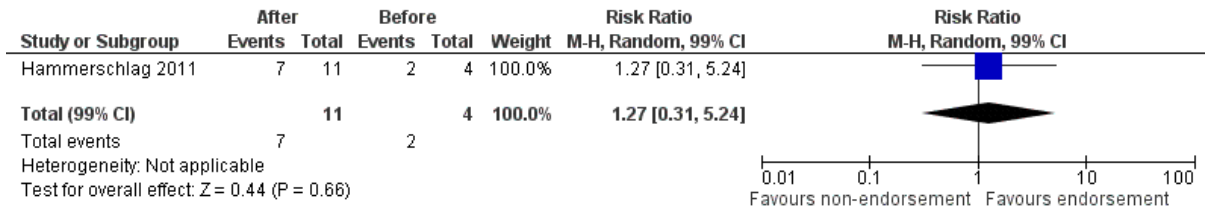

STRICTA – Length of clinical experience for after compared with before endorsement.

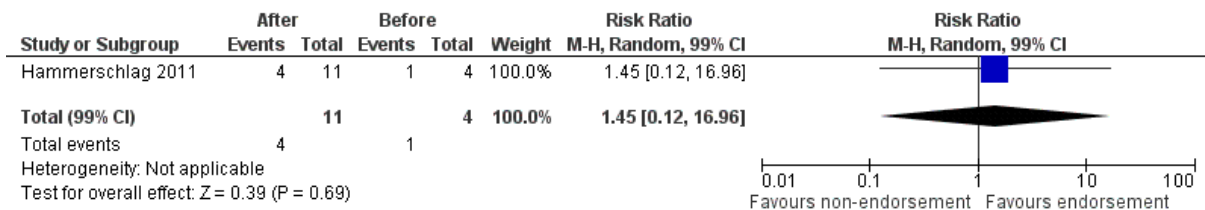

STRICTA – Expertise in condition for after compared with before endorsement.

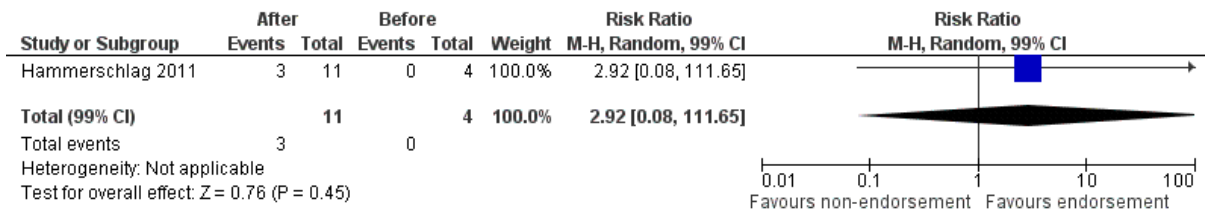

STRICTA – Explanations for treatment and control interventions for after compared with before endorsement.

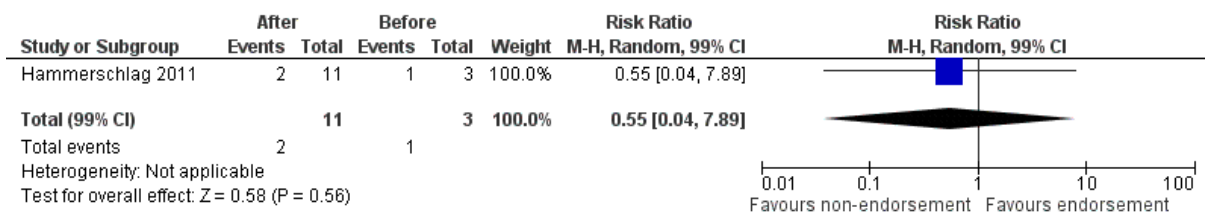

STRICTA – Sources that justify choice of control for after compared with before endorsement.

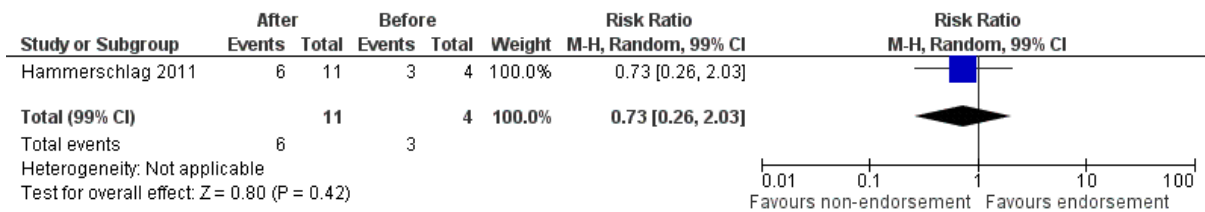

STRICTA – Mean summed score for after compared with before endorsement.

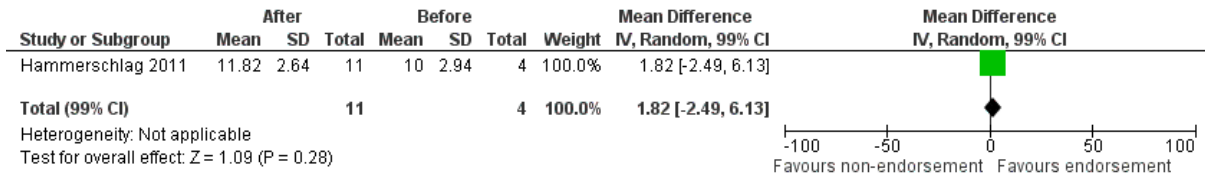

STROBE – Title/abstract for after compared with before endorsement.

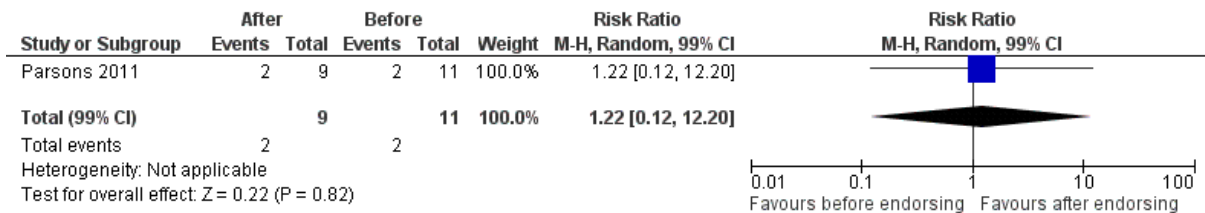

STROBE – Abstract for after compared with before endorsement.

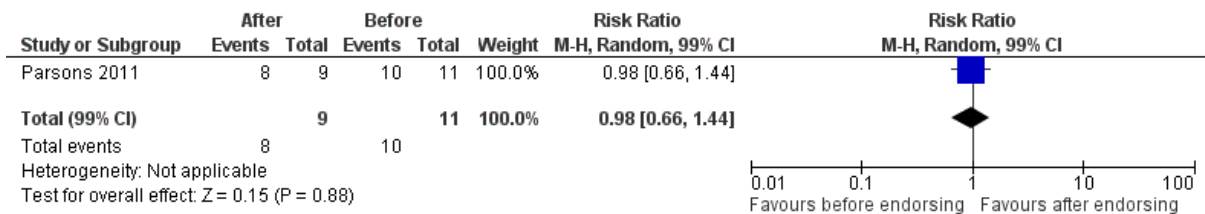

STROBE – Introduction, Background & rationale for after compared with before endorsement.

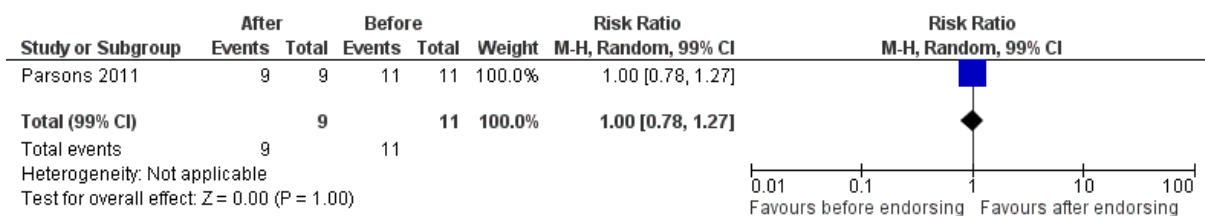

STROBE – Introduction, Objectives for after compared with before endorsement.

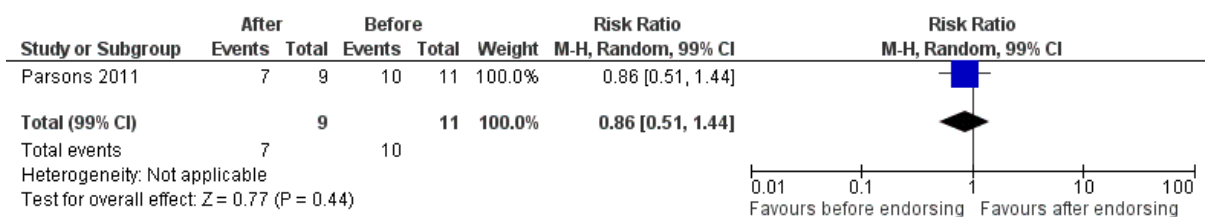

STROBE – Methods, Study design for after compared with before endorsement.

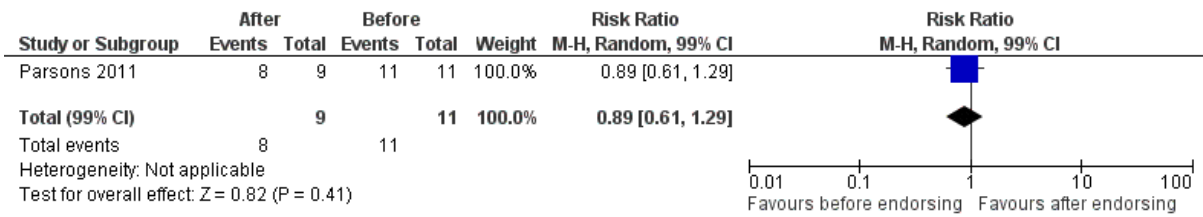

STROBE – Methods, Setting/locations/dates for after compared with before endorsement.

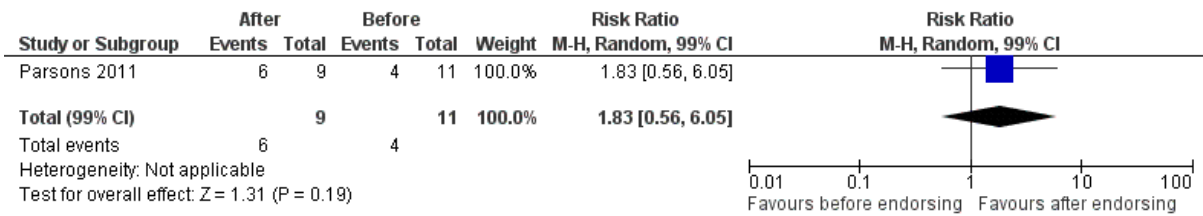

STROBE – Methods, Eligibility & selection for after compared with before endorsement.

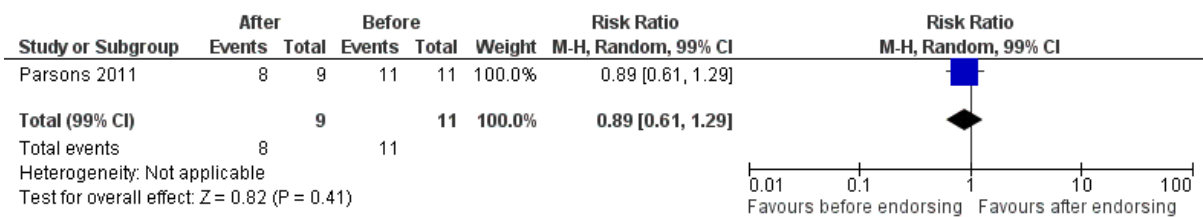

STROBE – Methods, Participant matching for after compared with before endorsement.

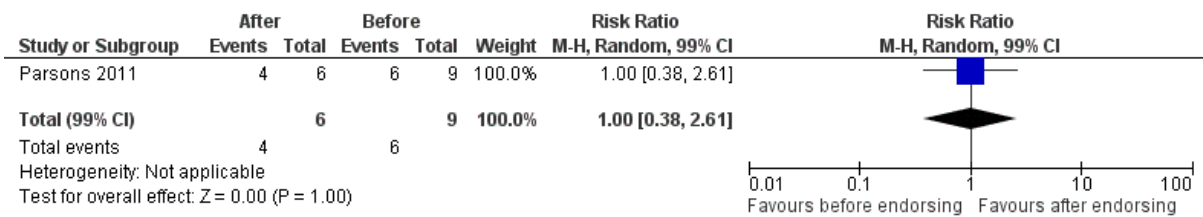

STROBE – Methods, Outcome/exposure/variables for after compared with before endorsement.

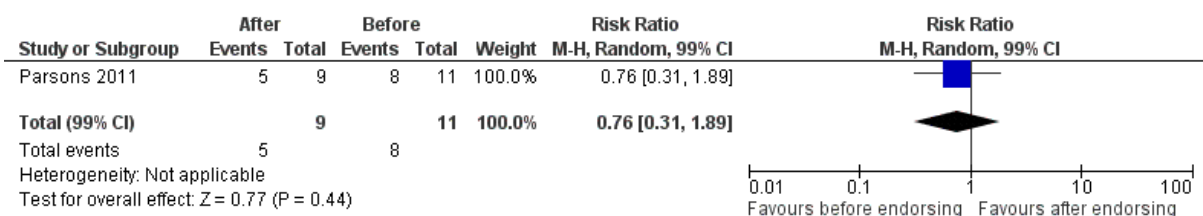

STROBE – Methods, Data sources/management for after compared with before endorsement.

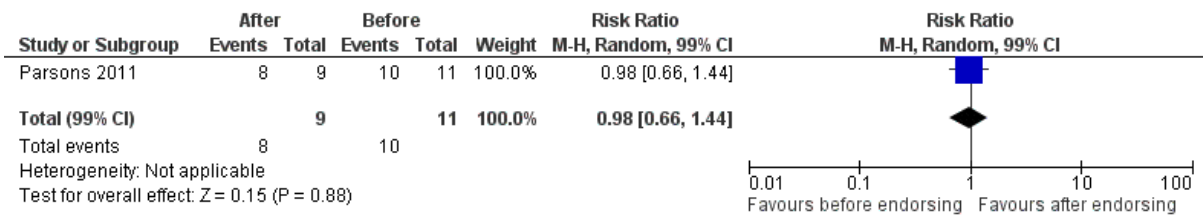

STROBE – Methods, Bias for after compared with before endorsement.

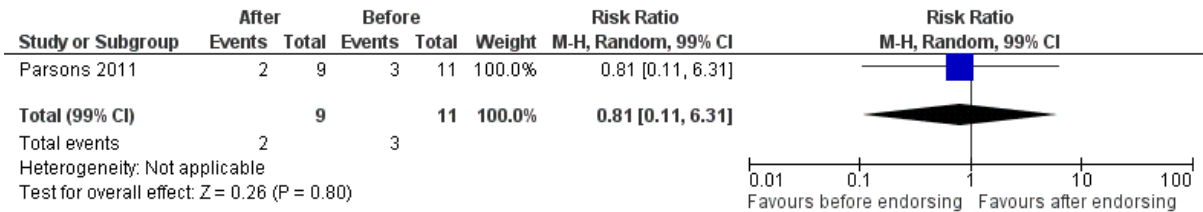

STROBE – Methods, Study size for after compared with before endorsement.

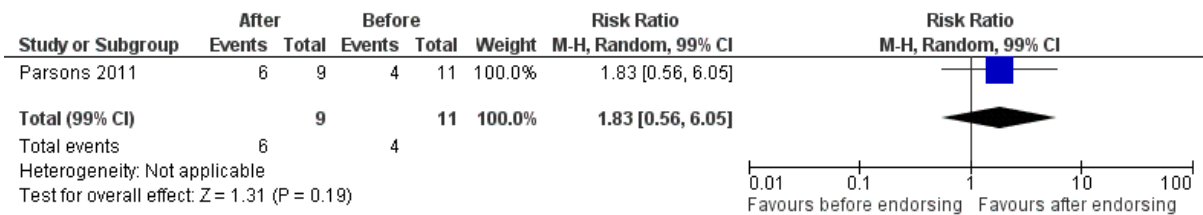

STROBE – Methods, Variables for after compared with before endorsement.

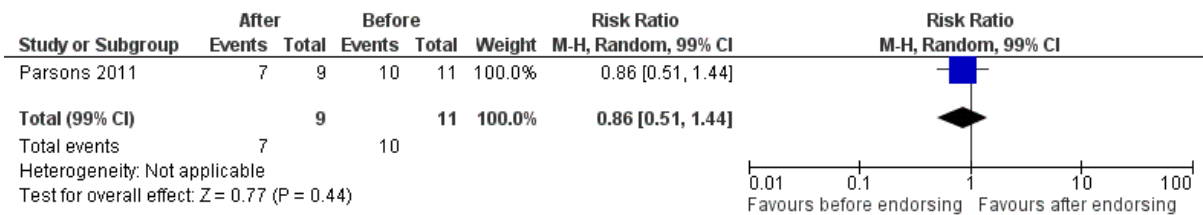

STROBE – Methods, Statistics for after compared with before endorsement.

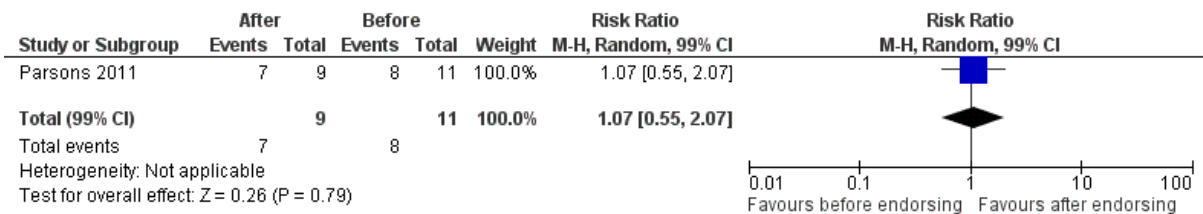

STROBE – Methods, Subgroup/interactions for after compared with before endorsement.

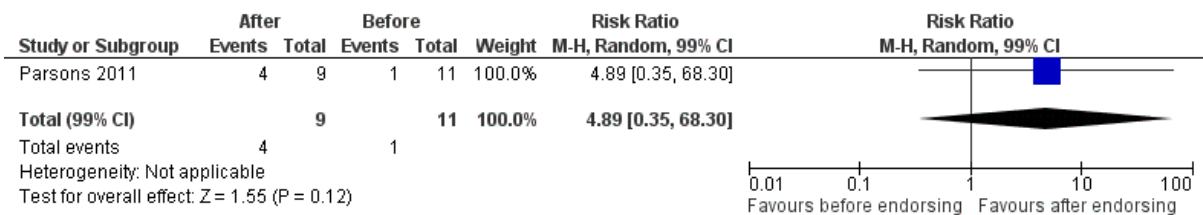

STROBE – Methods, Missing data for after compared with before endorsement.

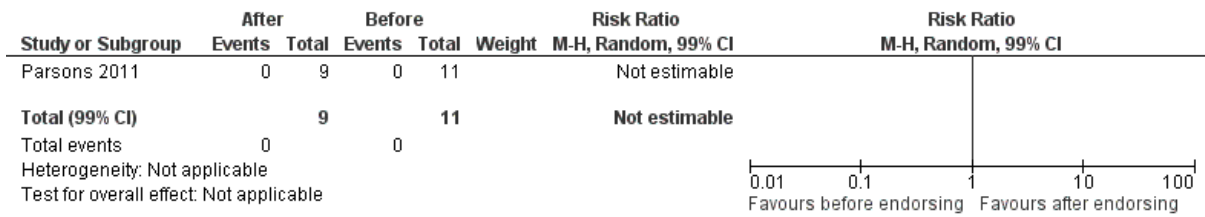

STROBE – Methods, Loss to followup/case matching/sampling for after compared with before endorsement.

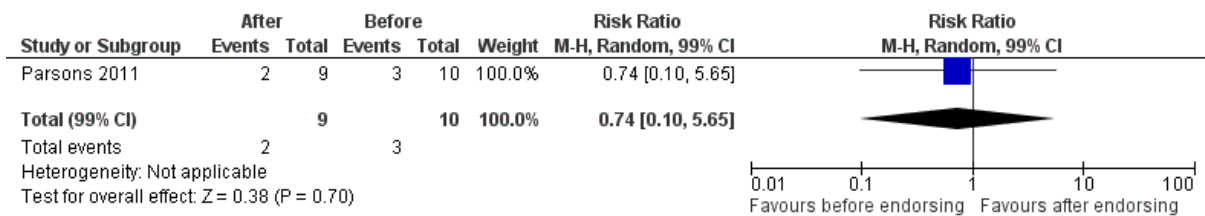

STROBE – Methods, Sensitivity analyses for after compared with before endorsement.

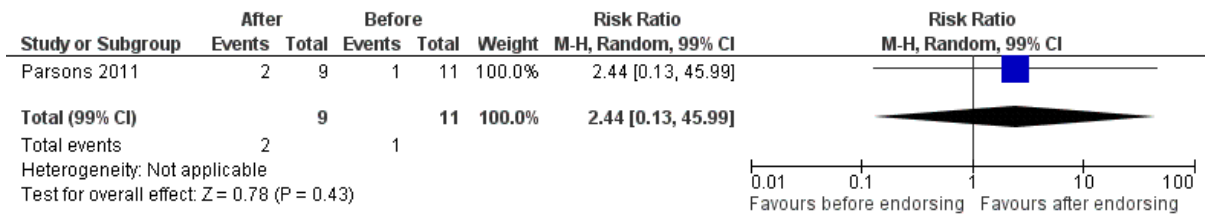

STROBE – Results, participant flow for after compared with before endorsement.

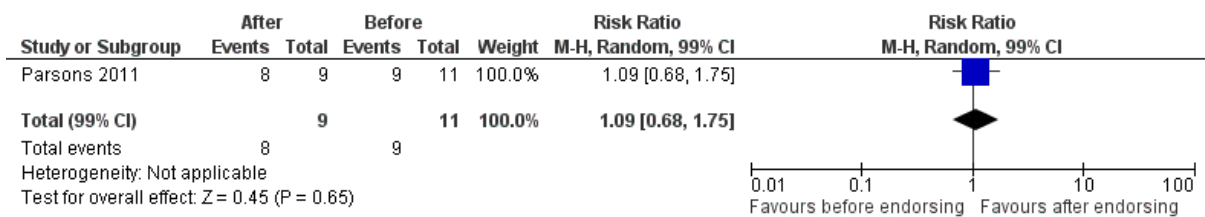

STROBE – Results, Nonparticipation for after compared with before endorsement.

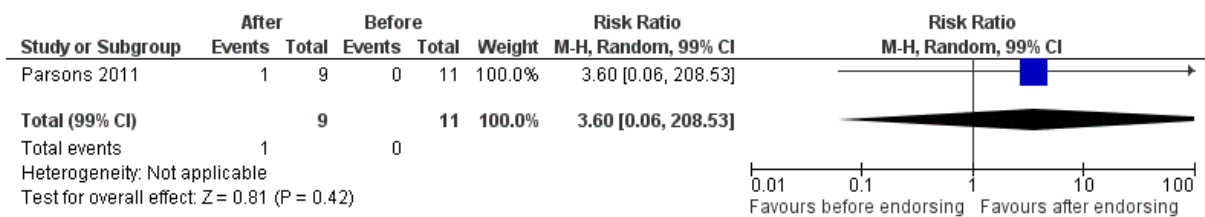

STROBE – Results, Flow diagram for after compared with before endorsement.

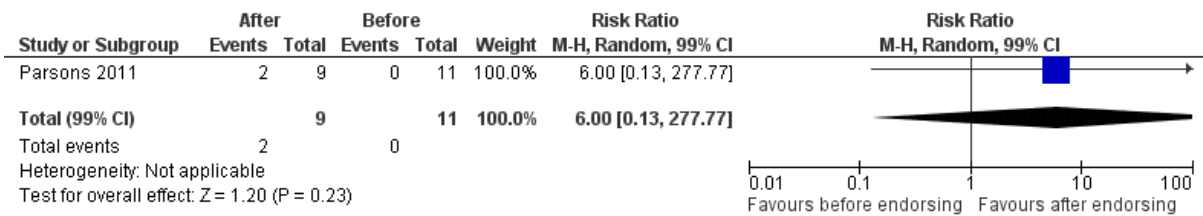

STROBE – Results, Participant characteristics for after compared with before endorsement.

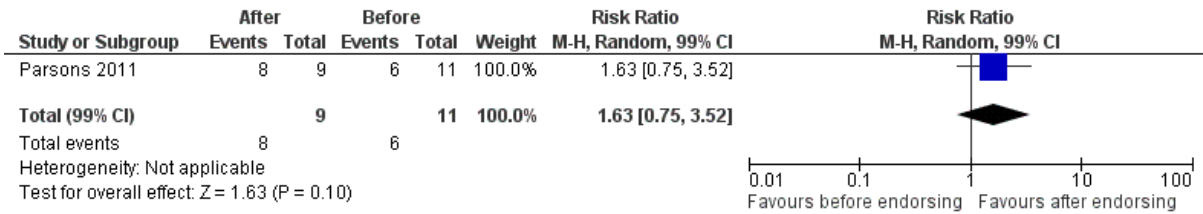

STROBE – Results, Missing data for after compared with before endorsement.

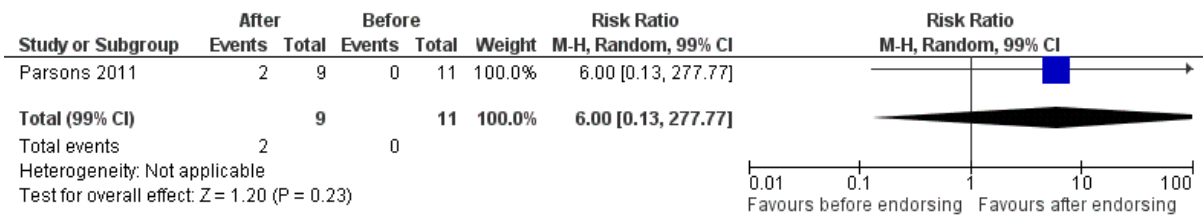

STROBE – Results, Follow-up (cohort) for after compared with before endorsement.

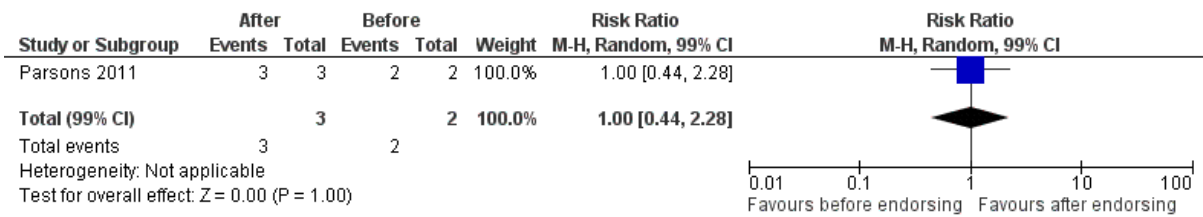

STROBE – Results, Outcome data for after compared with before endorsement.

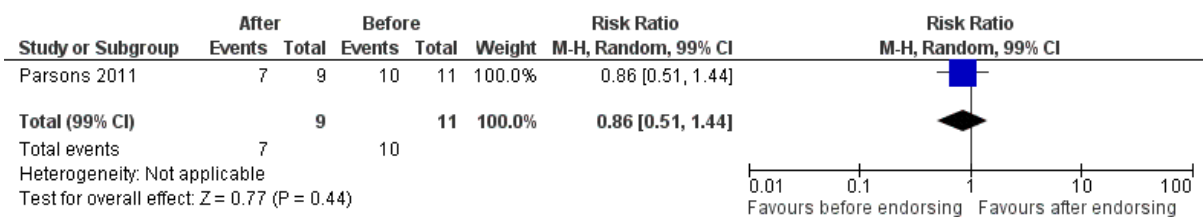

STROBE – Results, Effect/Precision for after compared with before endorsement.

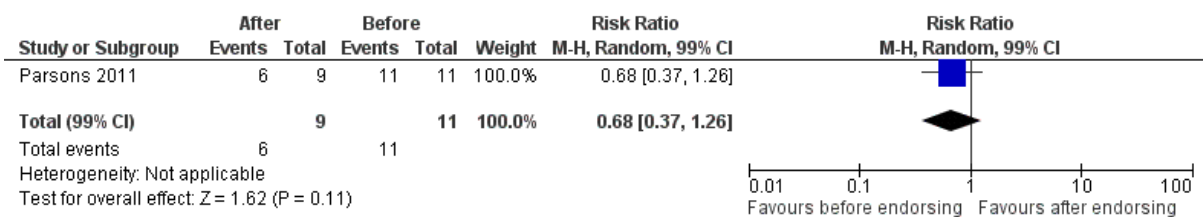

STROBE – Results, Boundaries for continuous categories for after compared with before endorsement.

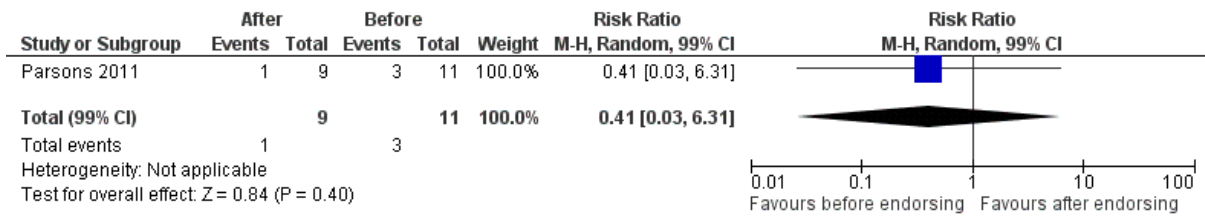

STROBE – Results, Relative to Absolute risks for after compared with before endorsement.

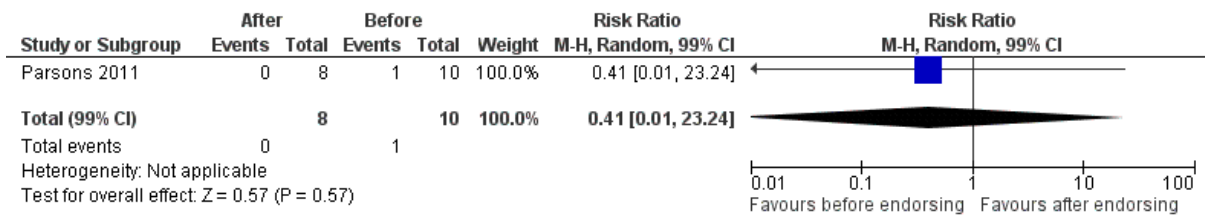

STROBE – Results, Other analyses for after compared with before endorsement.

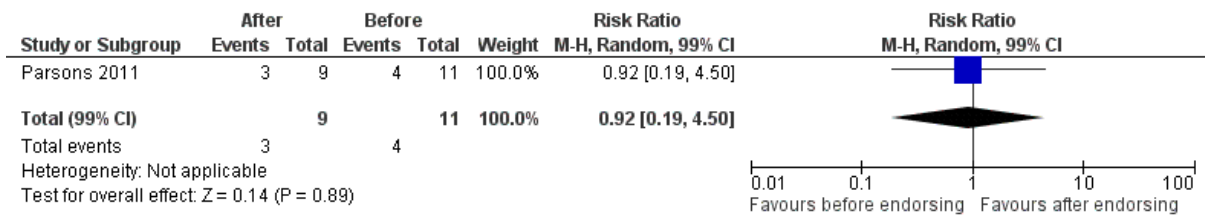

STROBE – Discussion, Key results for after compared with before endorsement.

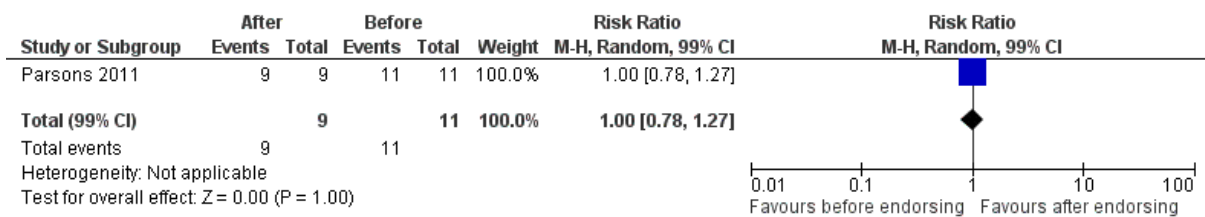

STROBE – Discussion, Limitations for after compared with before endorsement.

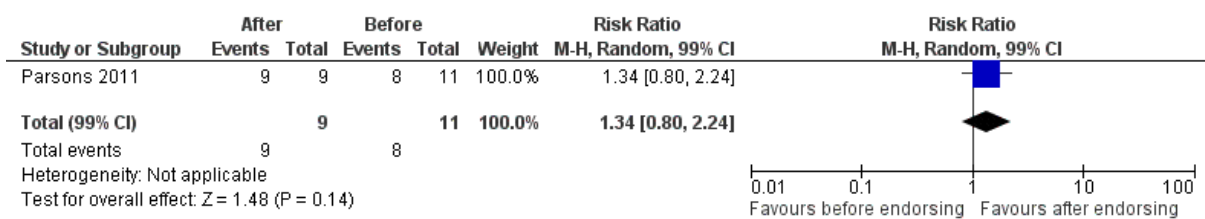

STROBE – Discussion, Interpretation for after compared with before endorsement.

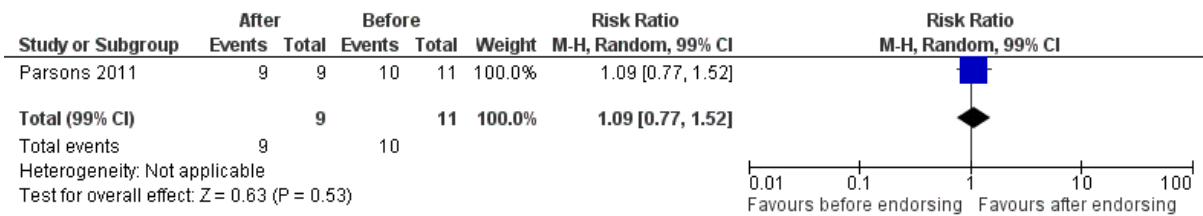

STROBE – Discussion, Generalizability for after compared with before endorsement.

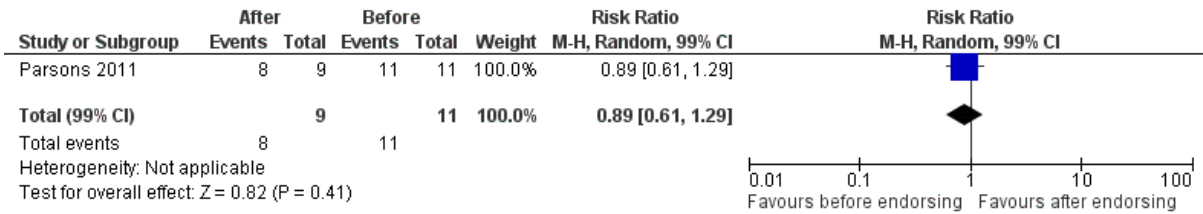

STROBE – Other, Funding for after compared with before endorsement.

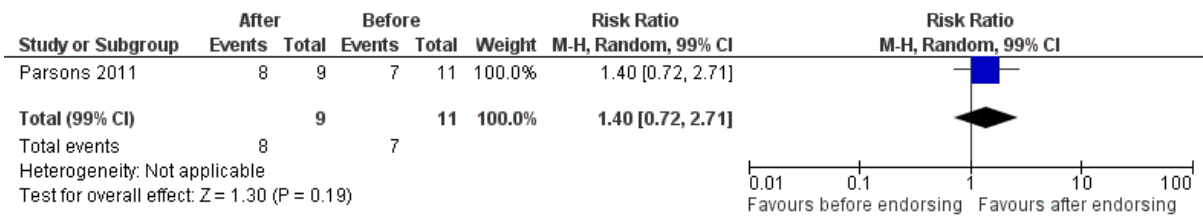

STROBE – Mean summed score for after compared with before endorsement.

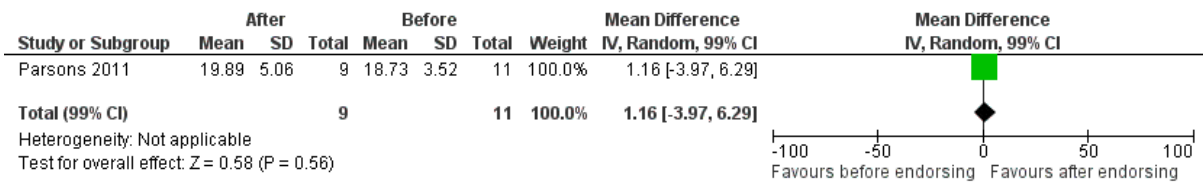

Supplement: stea018674.ww1_default.pdf [file stea018674.ww1_default.pdf]
